# Supplementary material
Source: MDPI journal article supplement (https://www.mdpi.com/2073-4433/11/4/359)
Supplement: s1 [file s1]

16:30 UTC, 24 Dec 2018

17:00 UTC, 24 Dec 2018

17:30 UTC, 24 Dec 2018

18:00 UTC, 24 Dec 2018

18:30 UTC, 24 Dec 2018

Observations: mean

Forecast state: mean

Analyzed state: mean

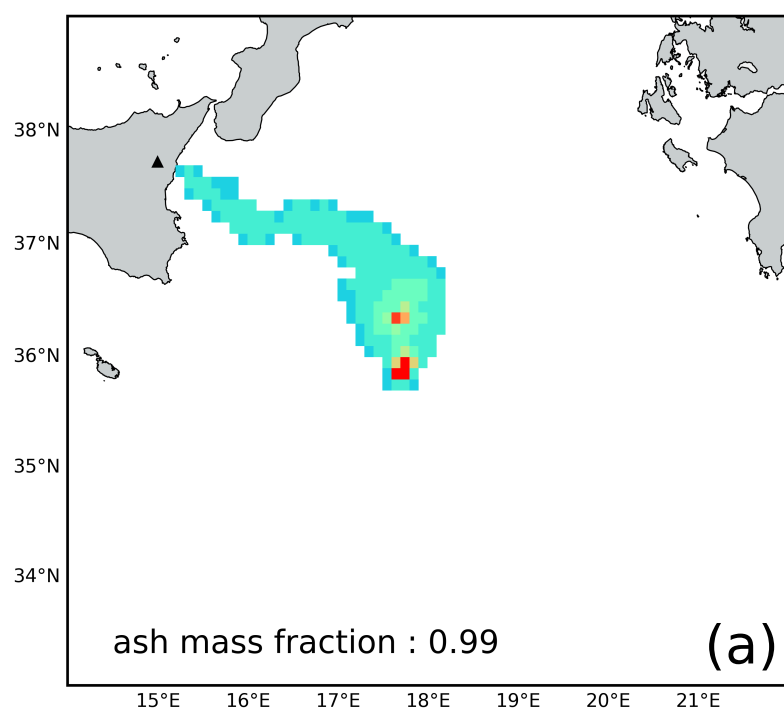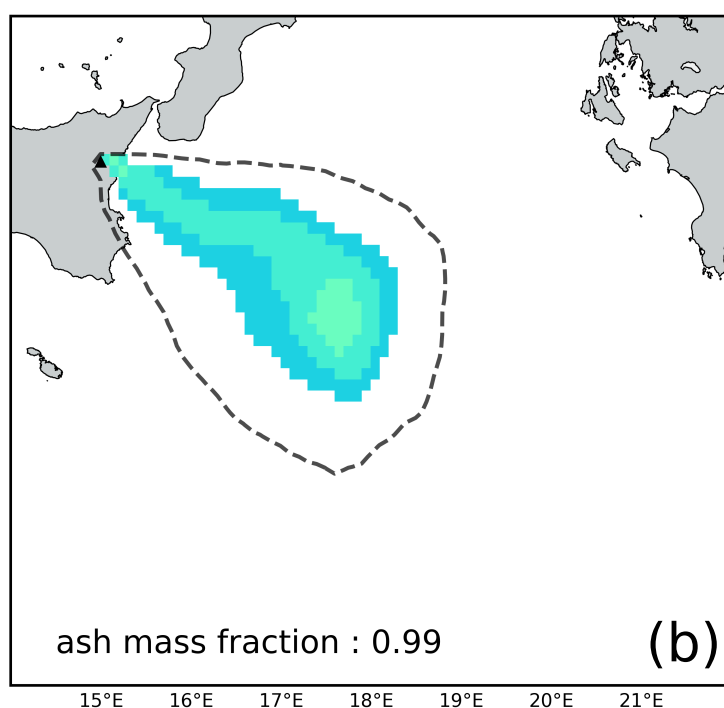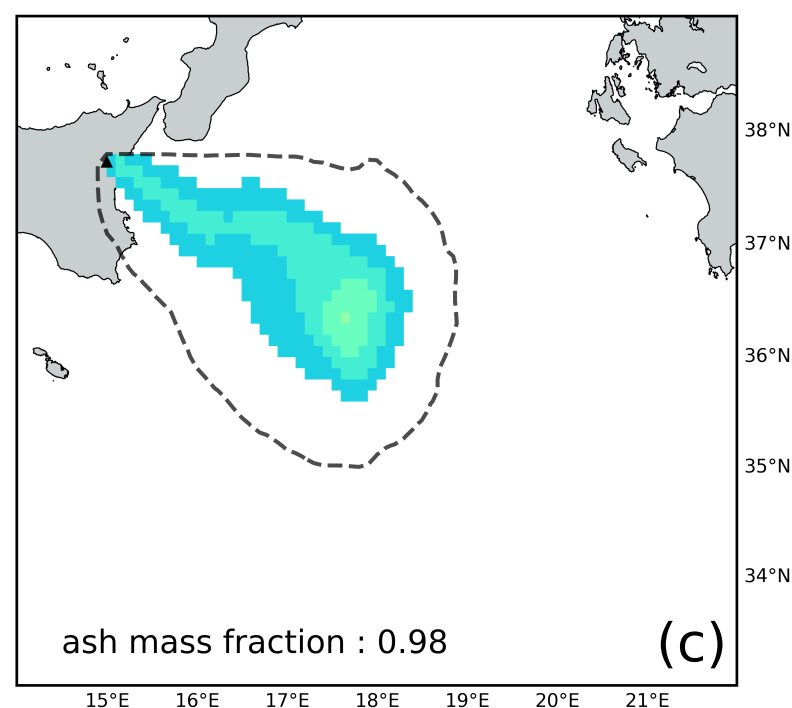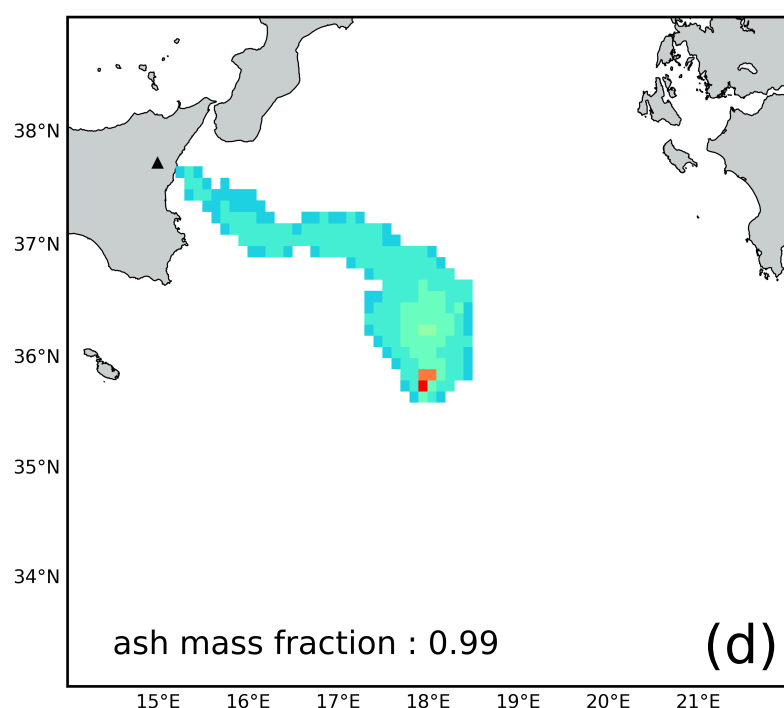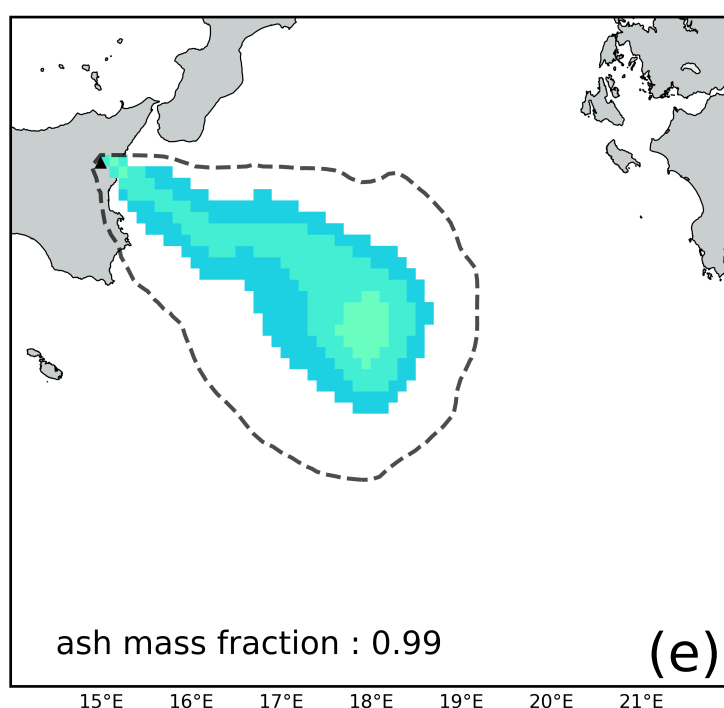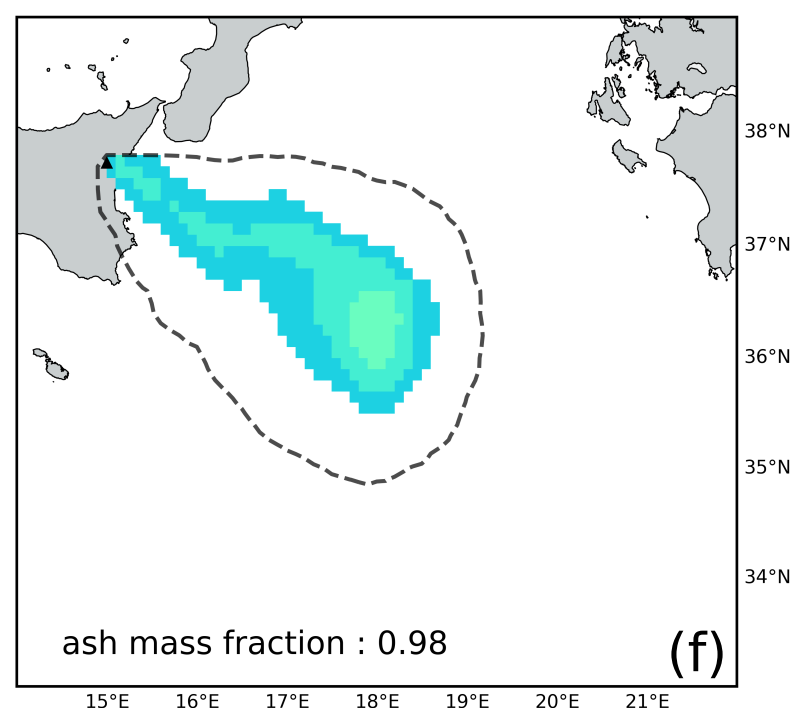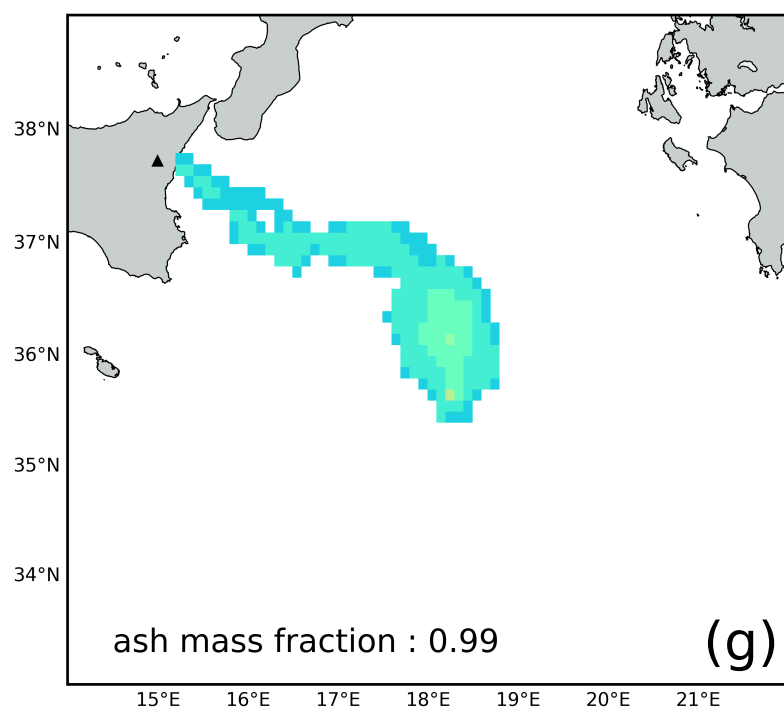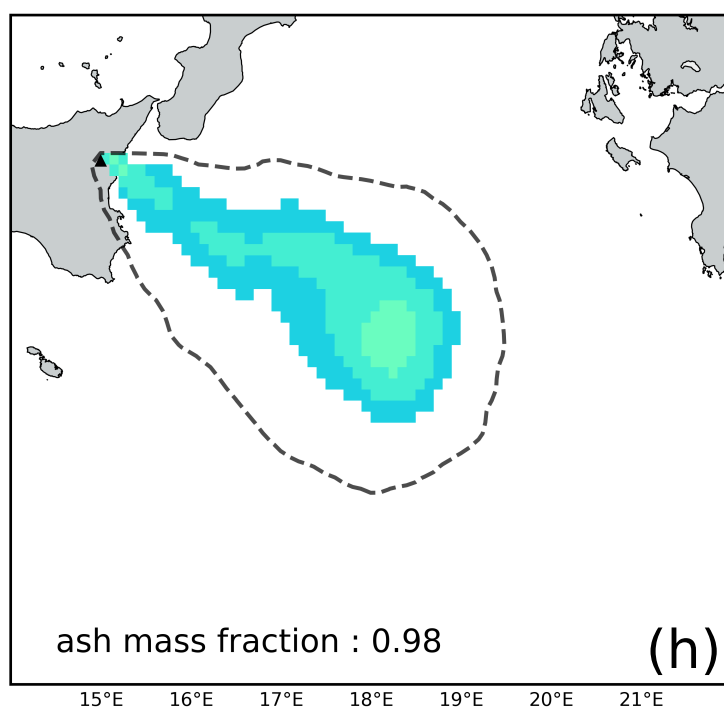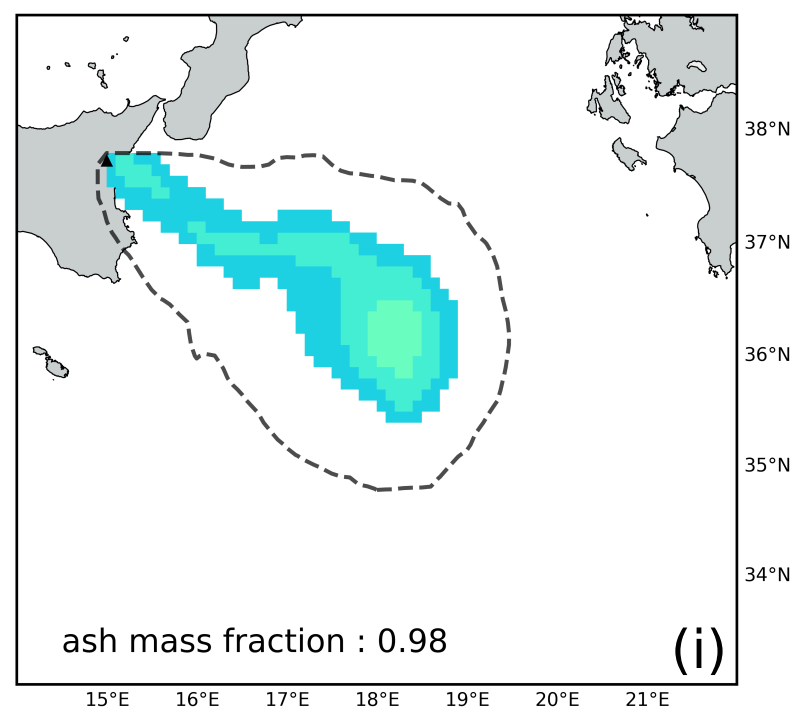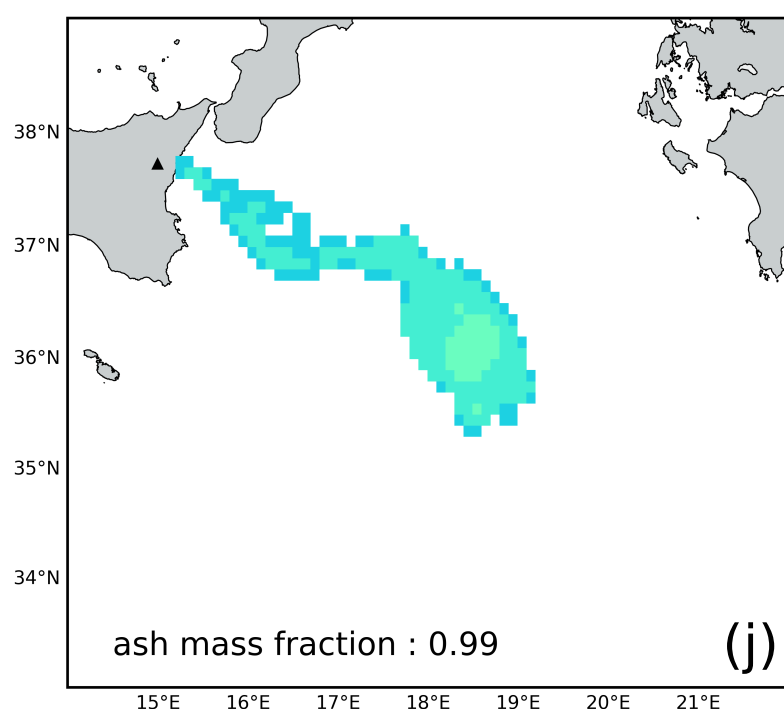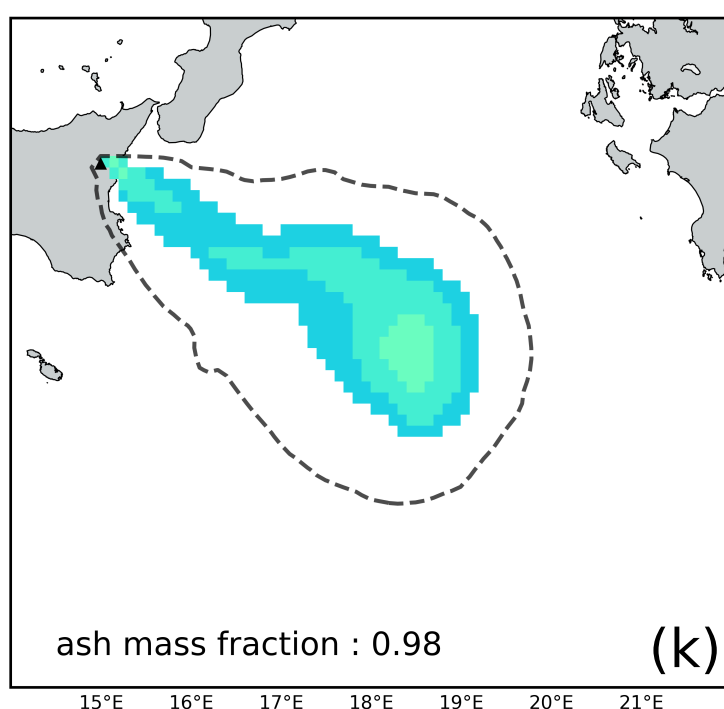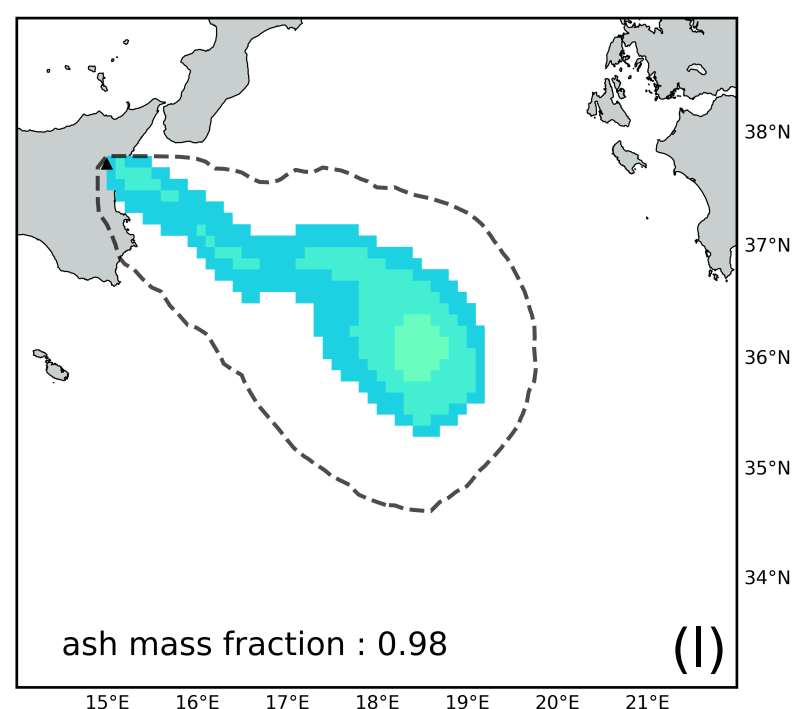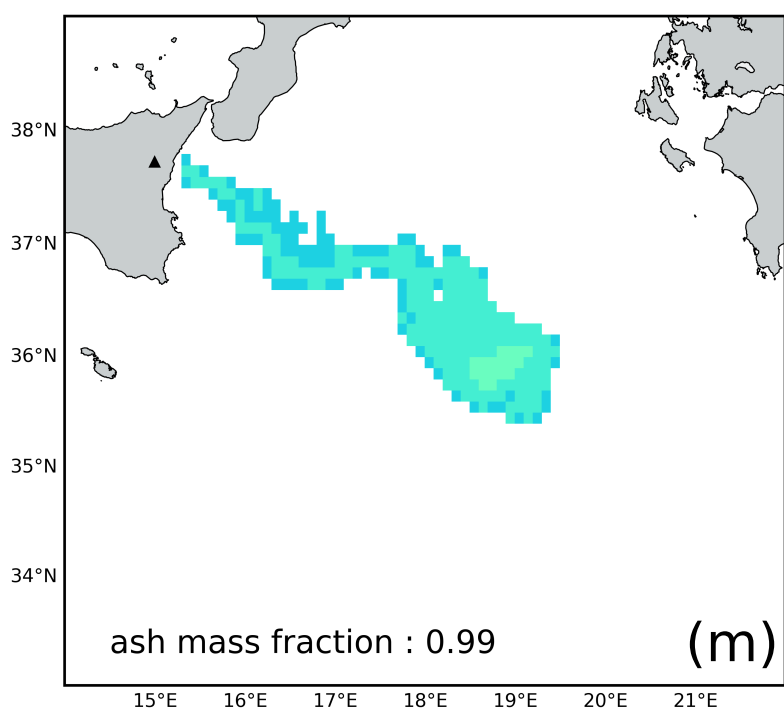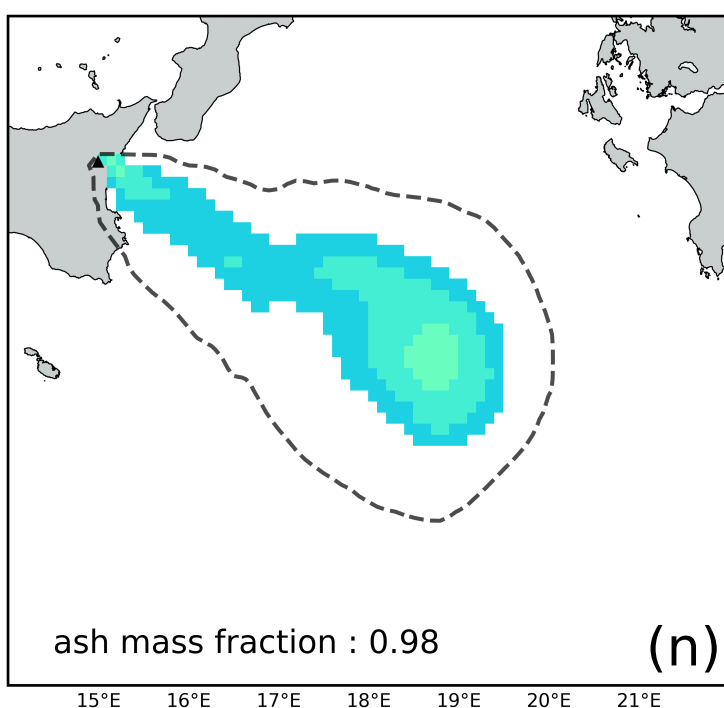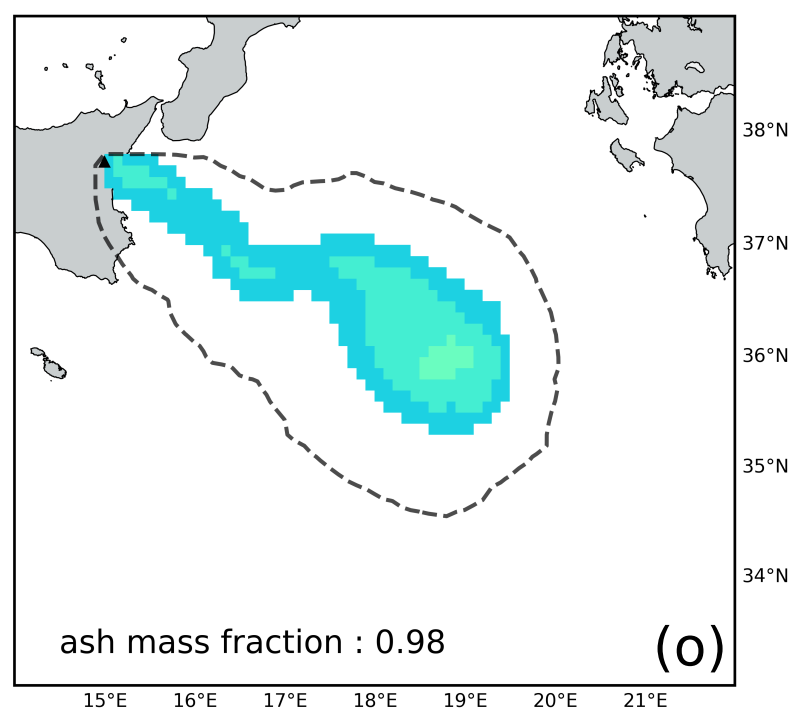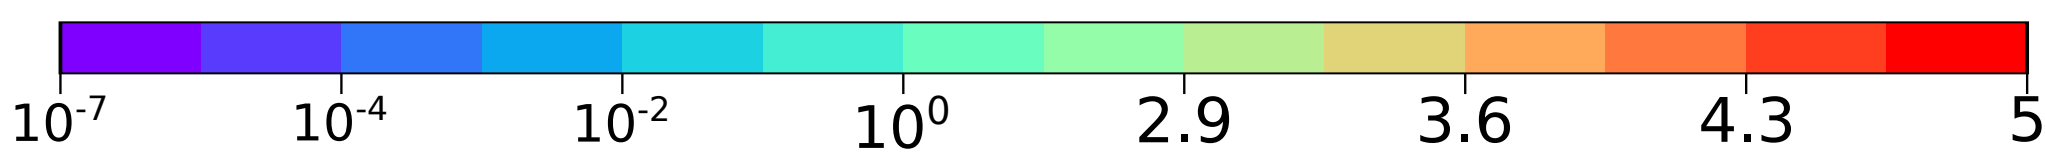

Ash mass [t km<sup>-2</sup>]
