# Supplementary material
Source: MDPI journal article supplement (https://www.mdpi.com/2073-4433/11/4/359)

|                        |                        |                        |                        |                        |
|------------------------|------------------------|------------------------|------------------------|------------------------|
| 18:30 UTC, 24 Dec 2018 | 18:00 UTC, 24 Dec 2018 | 17:30 UTC, 24 Dec 2018 | 17:00 UTC, 24 Dec 2018 | 16:30 UTC, 24 Dec 2018 |
|------------------------|------------------------|------------------------|------------------------|------------------------|

|                        |                        |                        |                        |                        |
|------------------------|------------------------|------------------------|------------------------|------------------------|
| 18:30 UTC, 24 Dec 2018 | 18:00 UTC, 24 Dec 2018 | 17:30 UTC, 24 Dec 2018 | 17:00 UTC, 24 Dec 2018 | 16:30 UTC, 24 Dec 2018 |
|------------------------|------------------------|------------------------|------------------------|------------------------|

|                        |                        |                        |                        |                        |
|------------------------|------------------------|------------------------|------------------------|------------------------|
| 18:30 UTC, 24 Dec 2018 | 18:00 UTC, 24 Dec 2018 | 17:30 UTC, 24 Dec 2018 | 17:00 UTC, 24 Dec 2018 | 16:30 UTC, 24 Dec 2018 |
|------------------------|------------------------|------------------------|------------------------|------------------------|

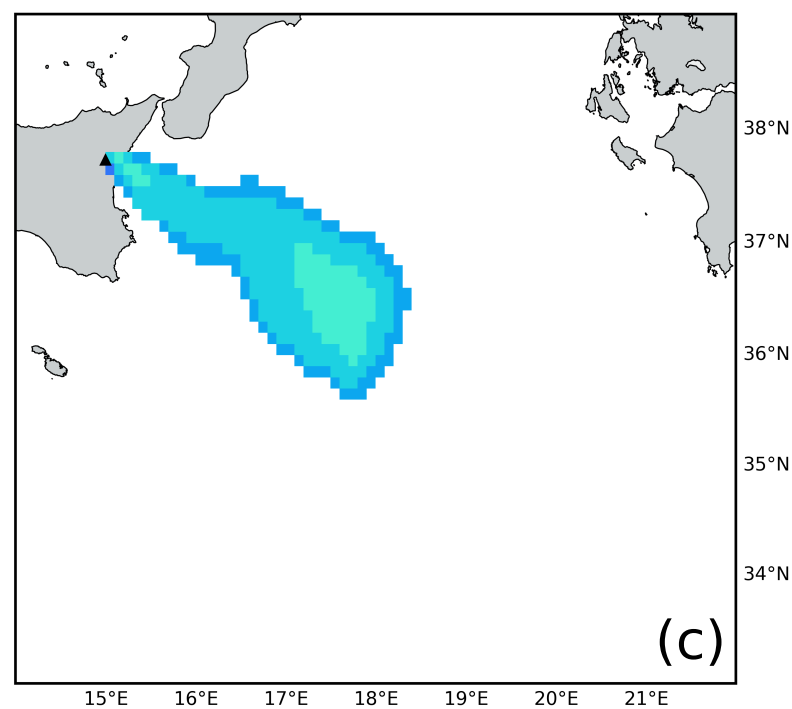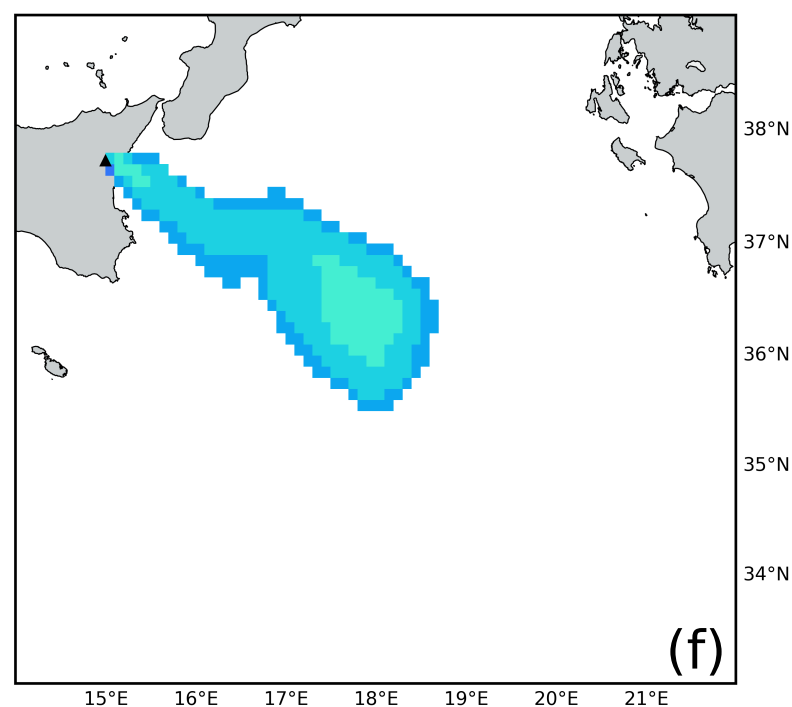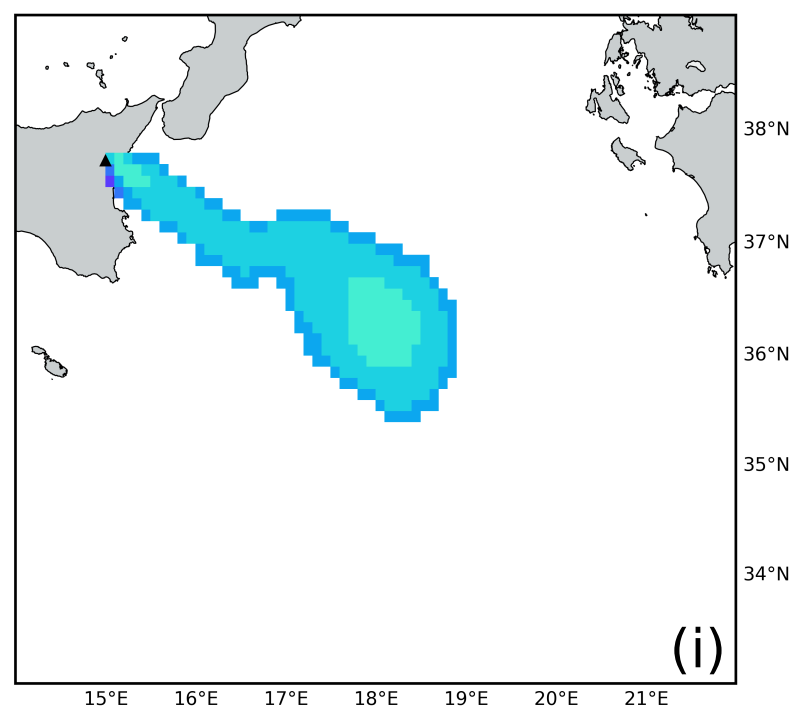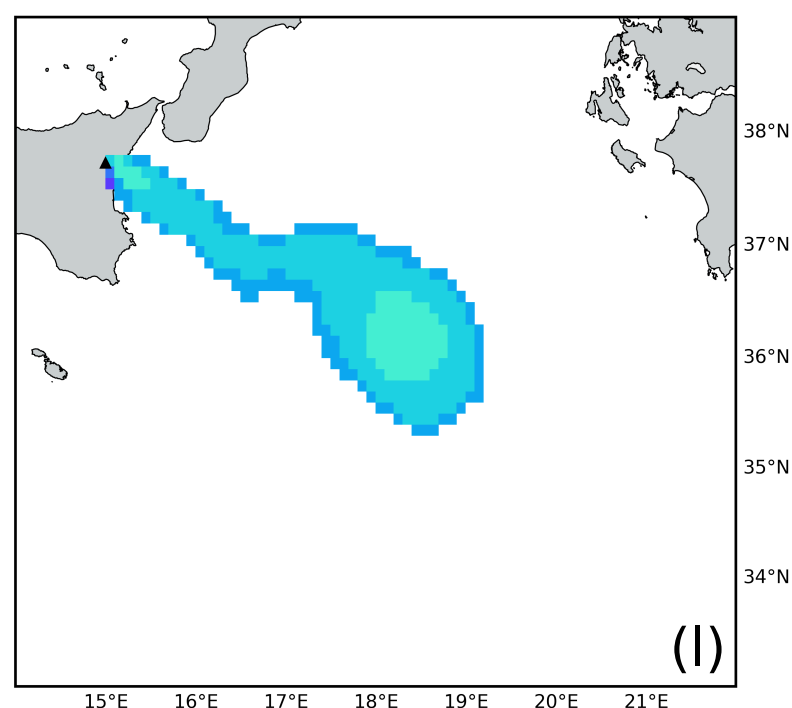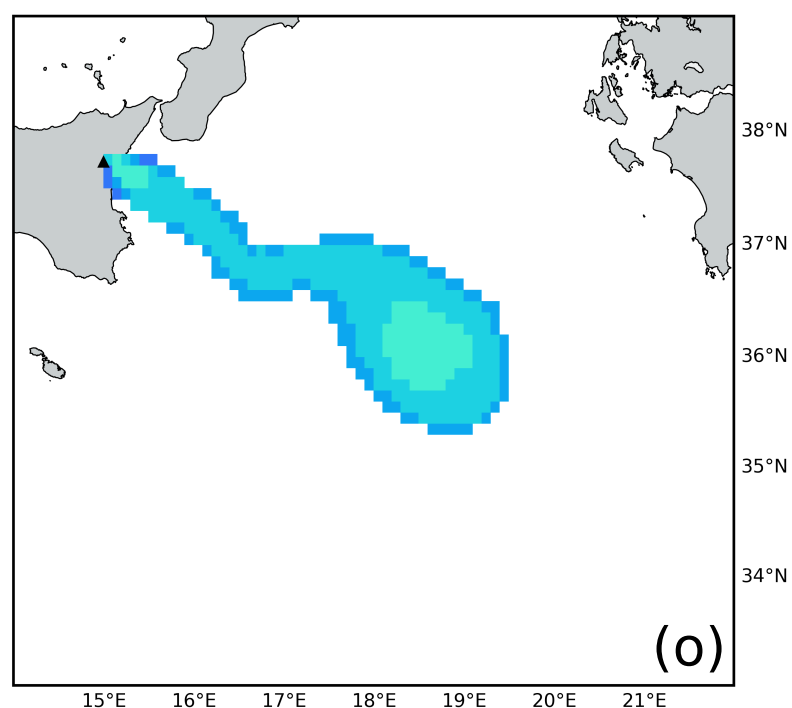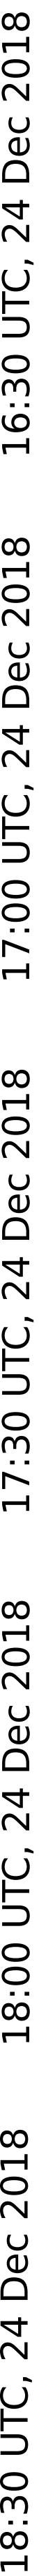

Supplement: s1 [file s1]
