# Supplementary material
Source: MDPI journal article supplement (https://www.mdpi.com/2073-4433/11/4/359)

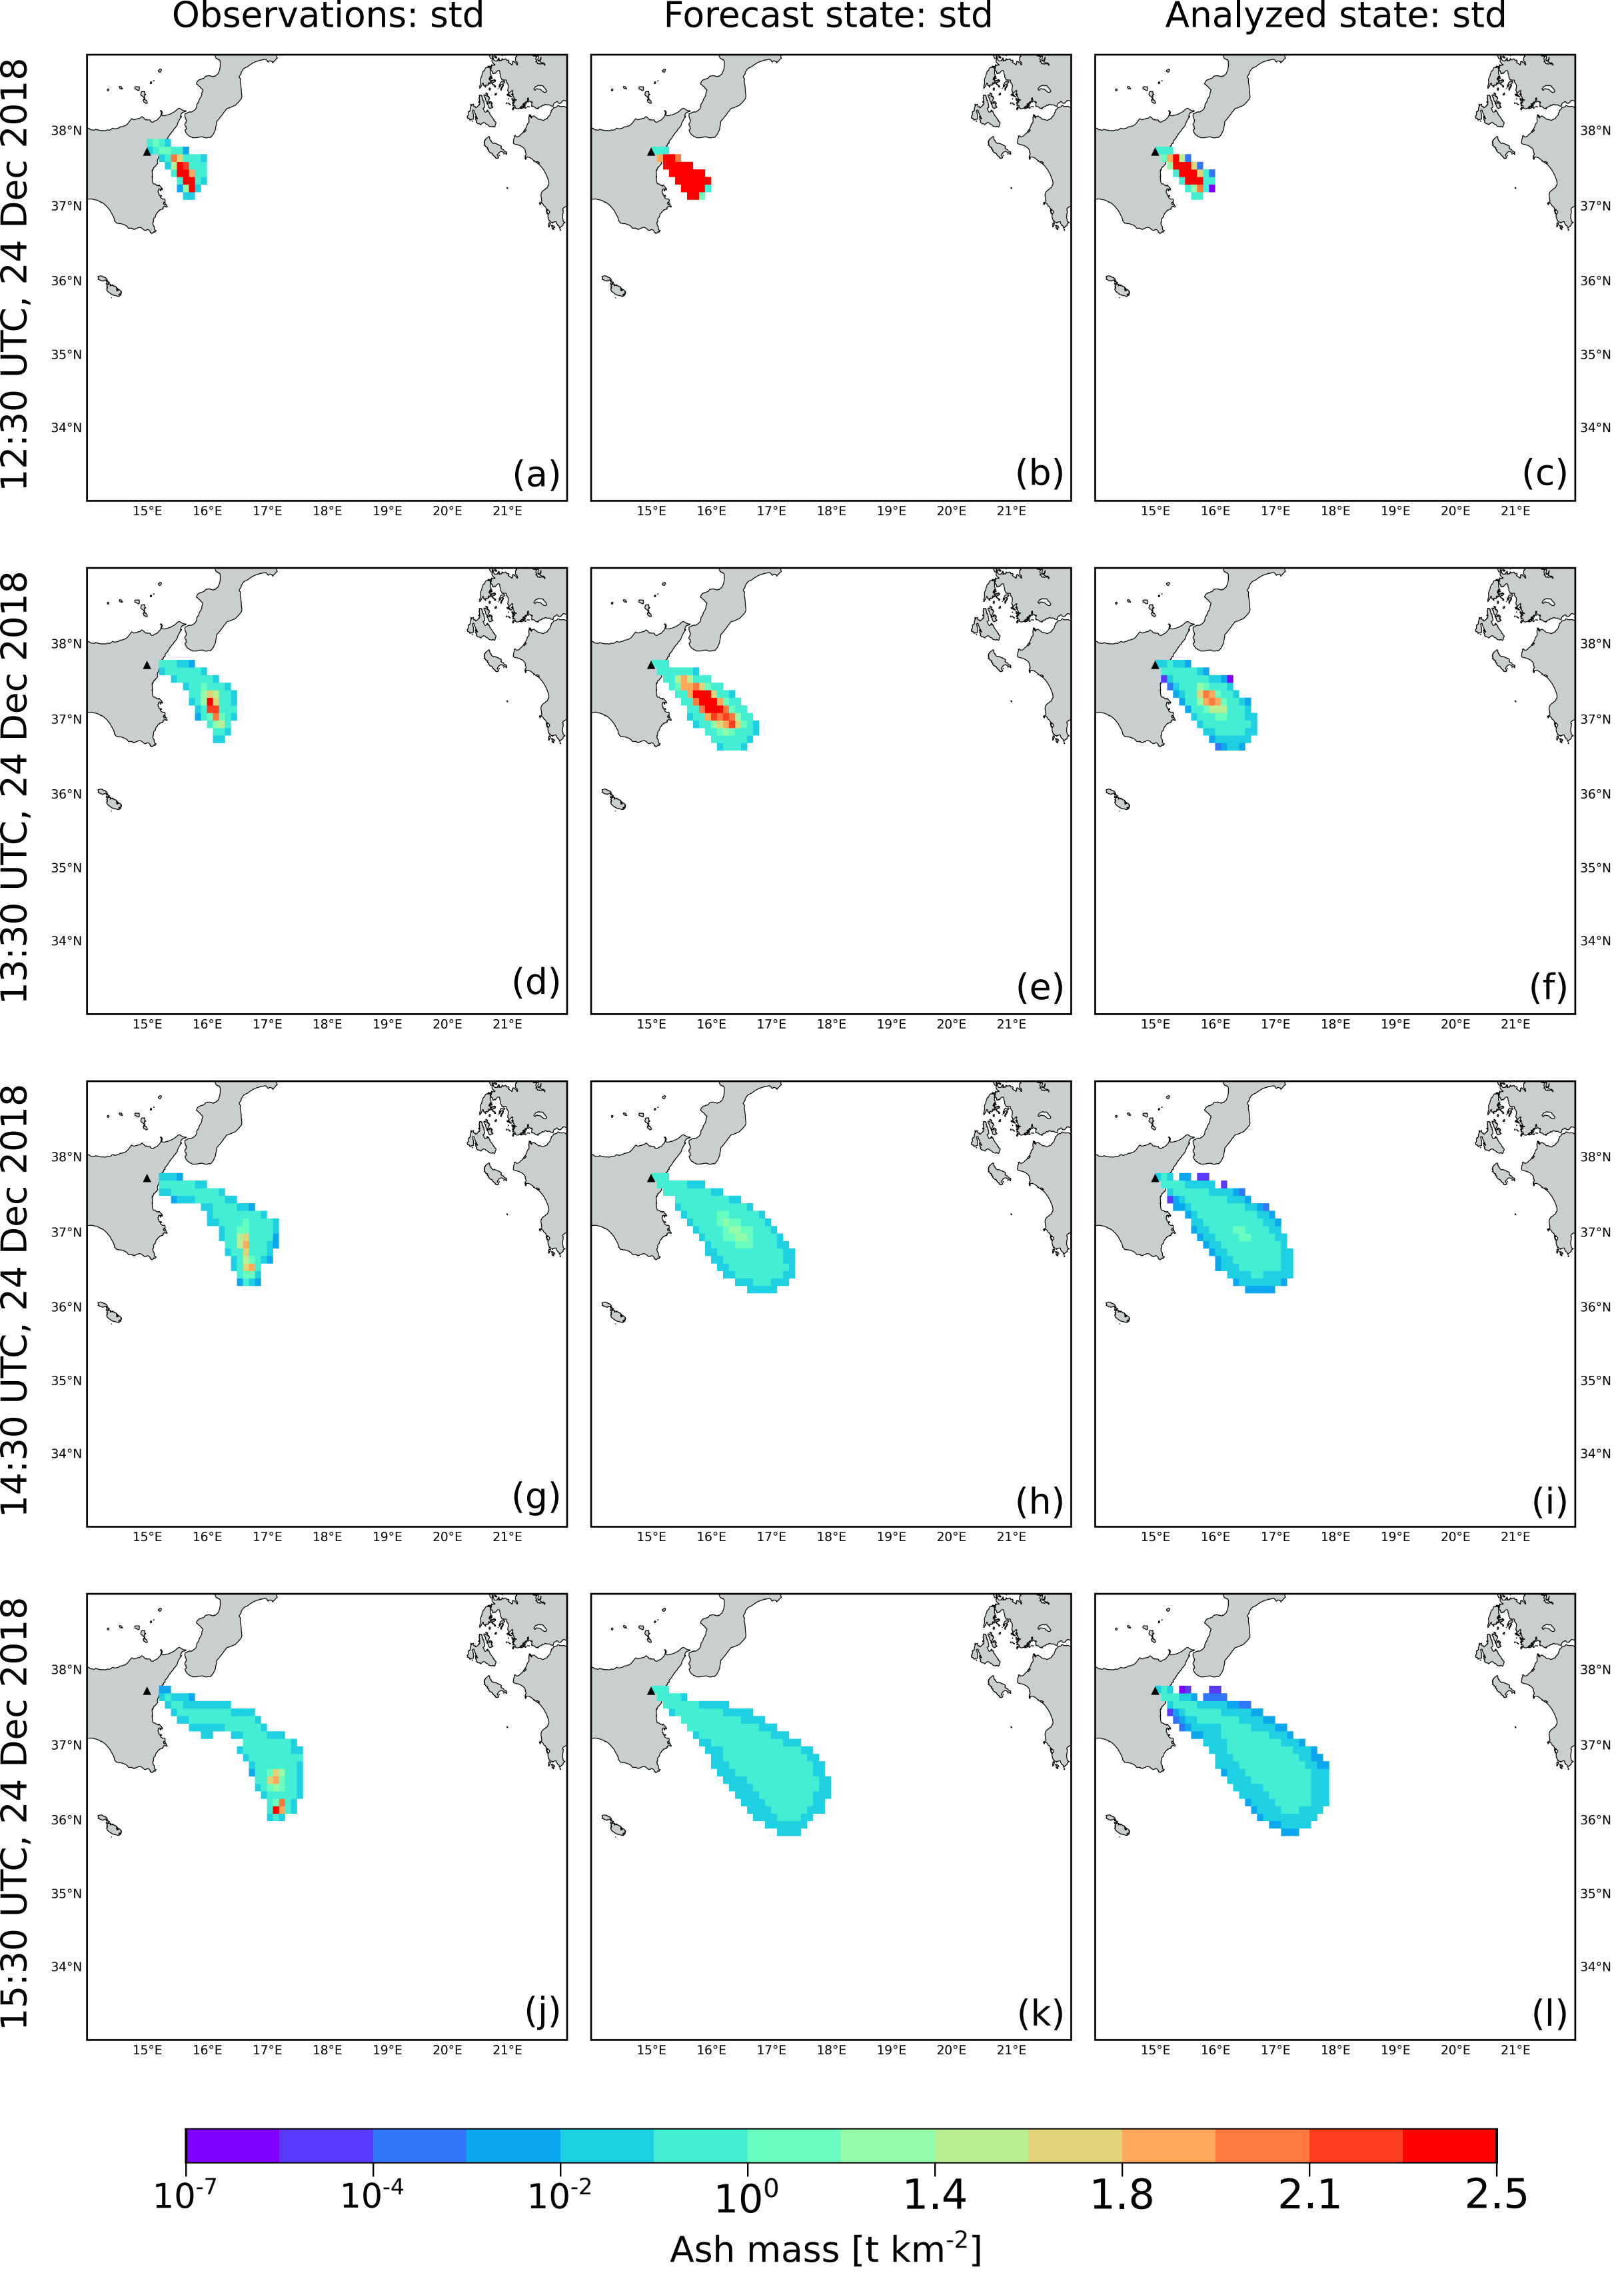

Supplement: s1 [file s1]

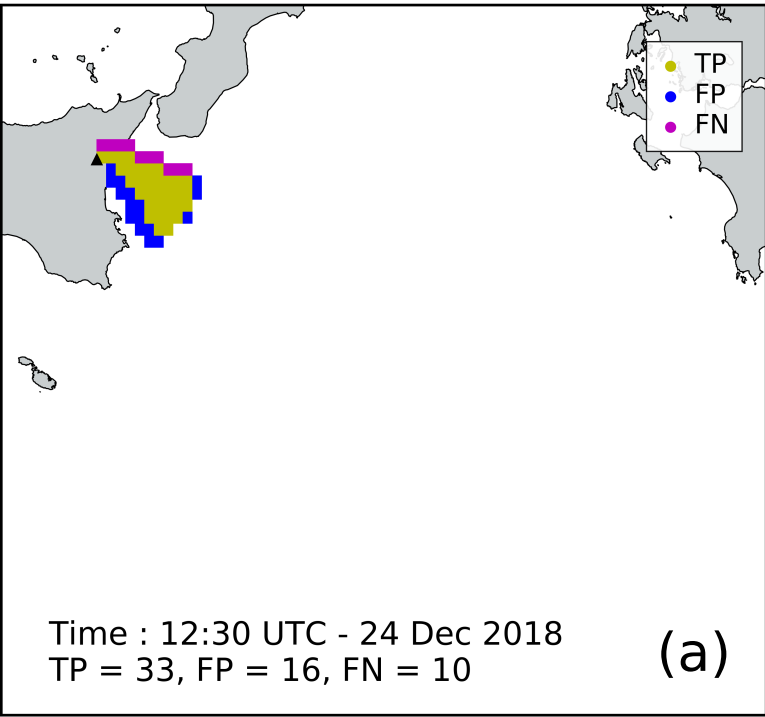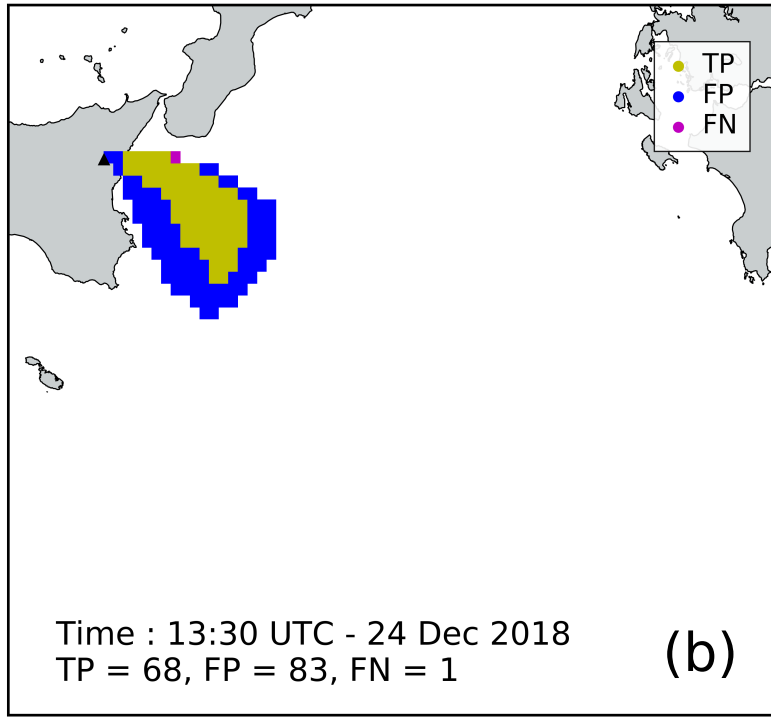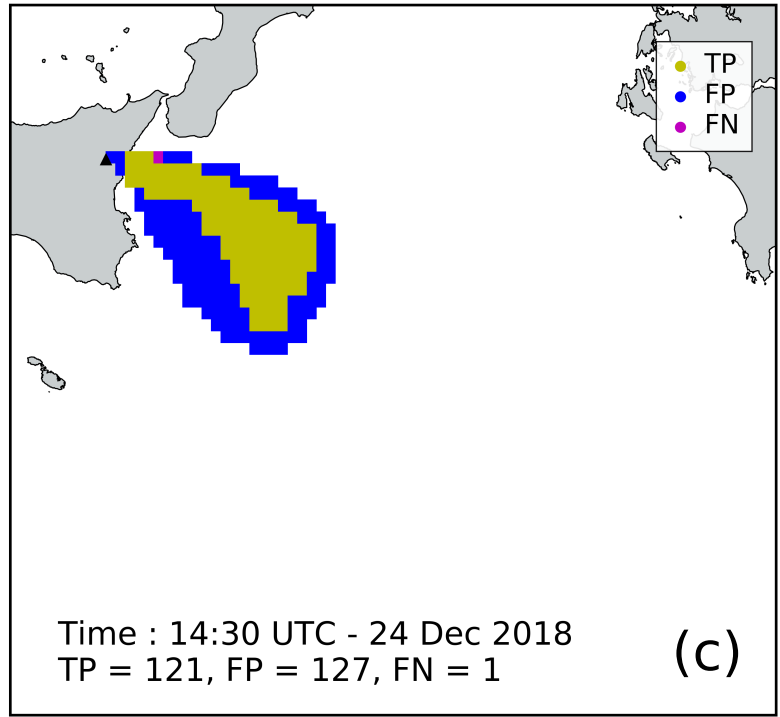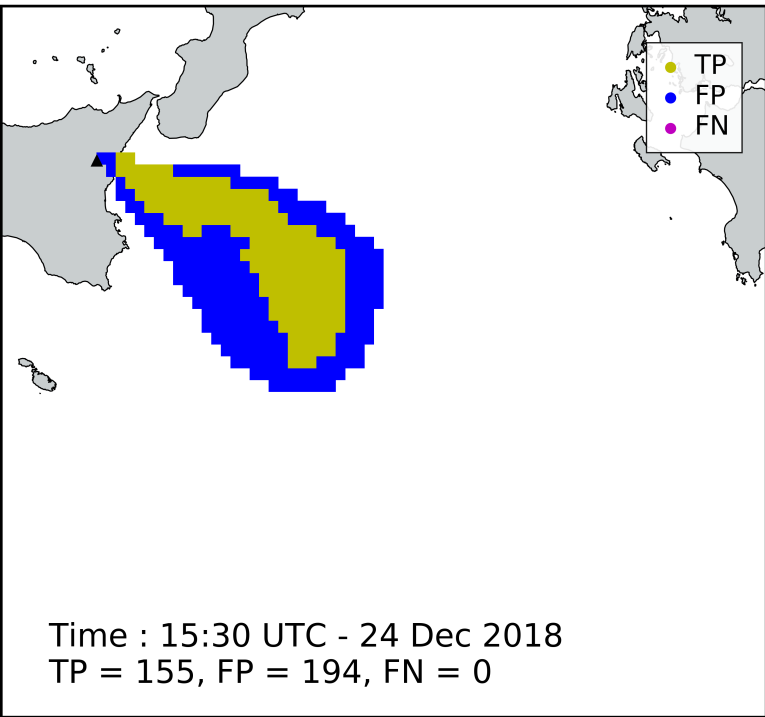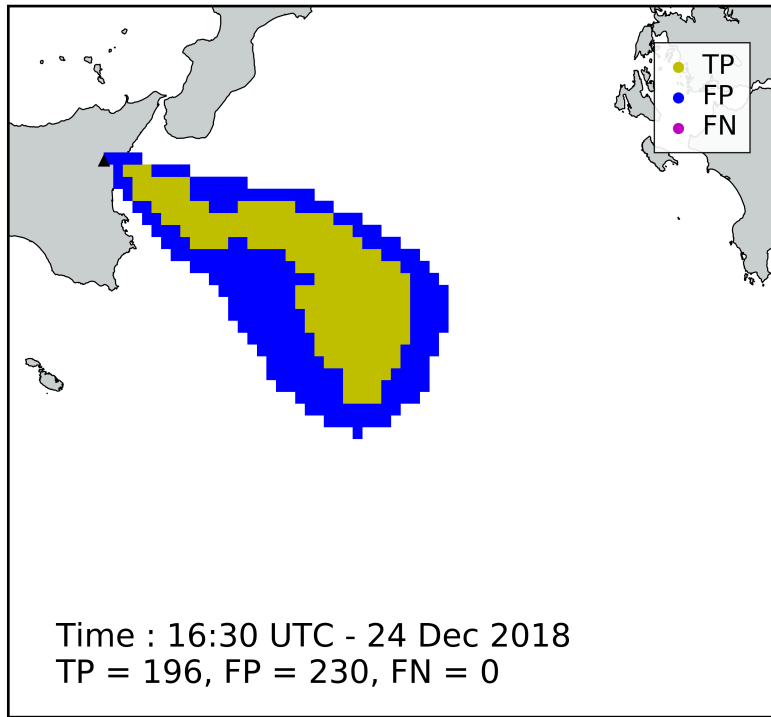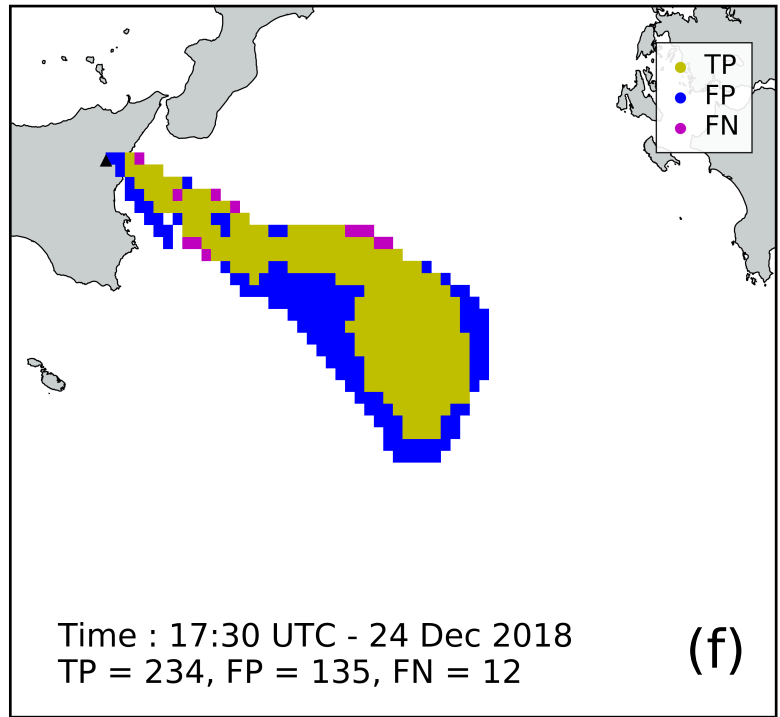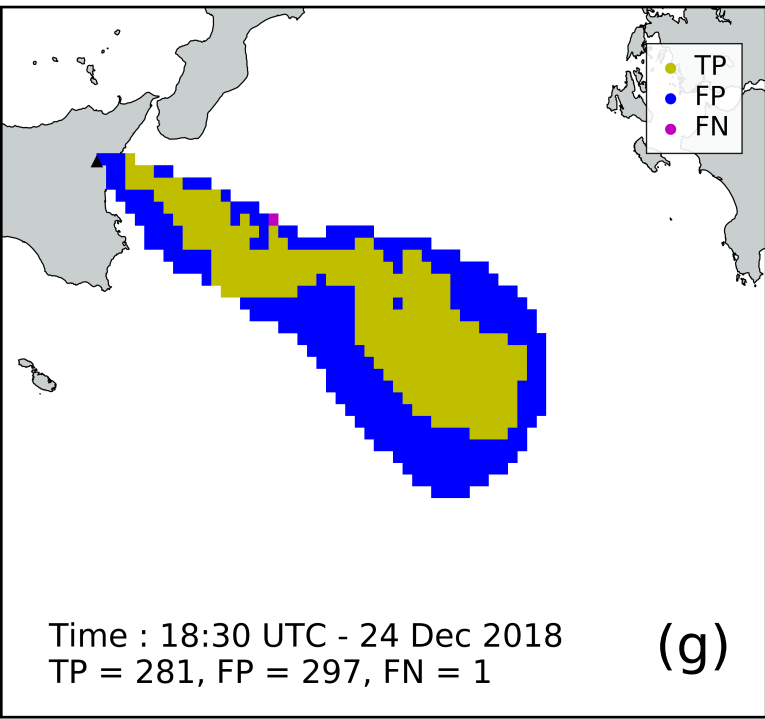

Supplement: s1 [file s1]

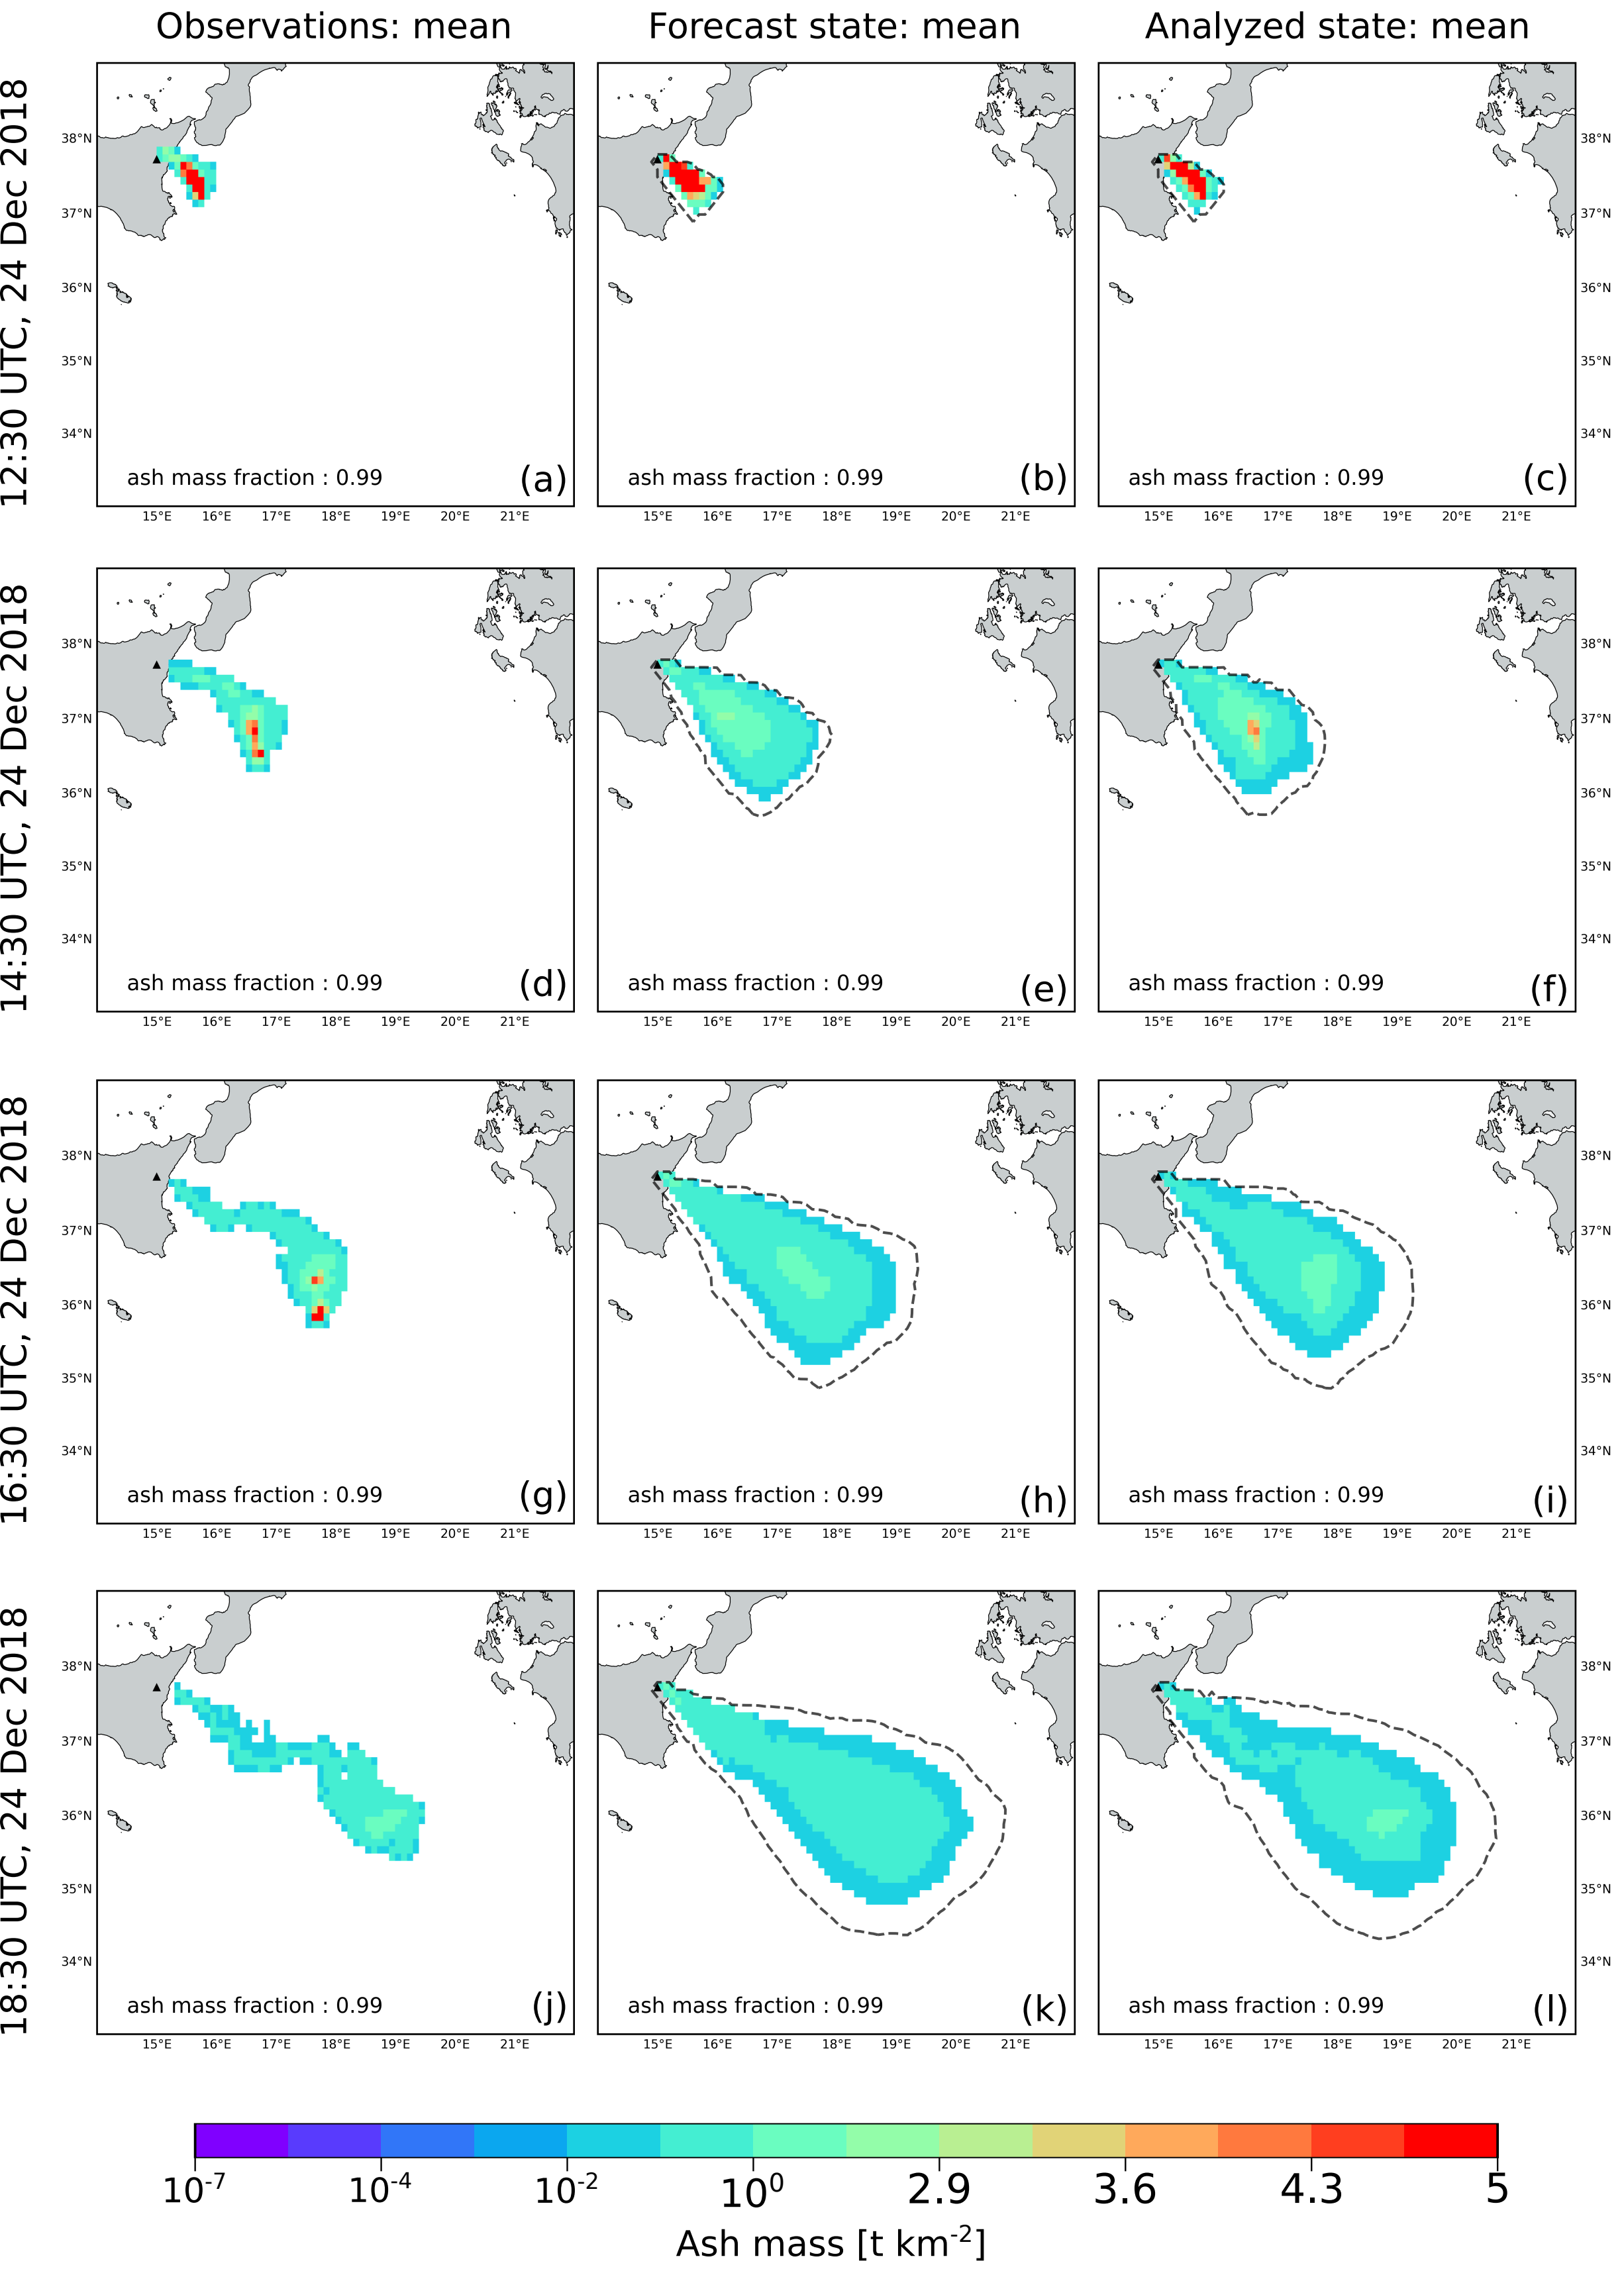

Supplement: s1 [file s1]

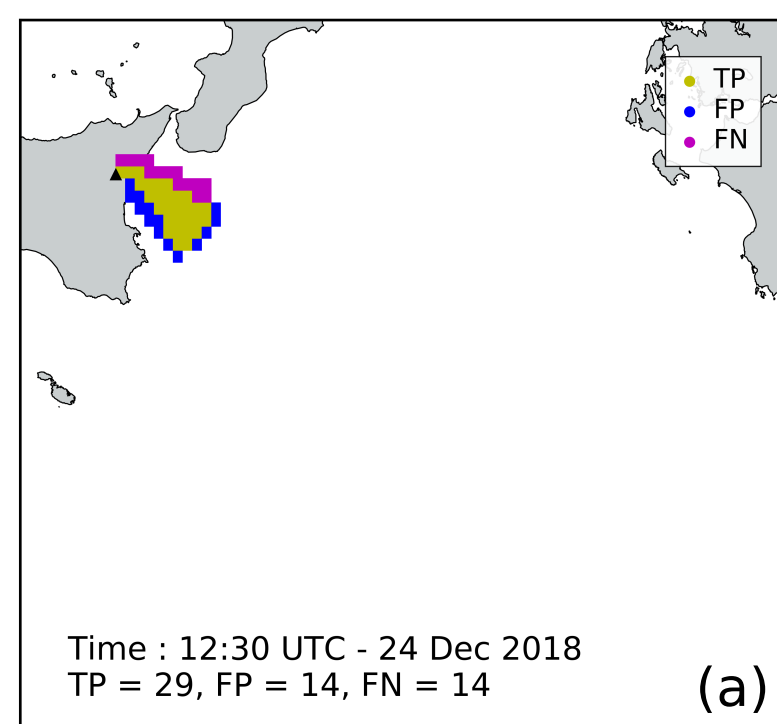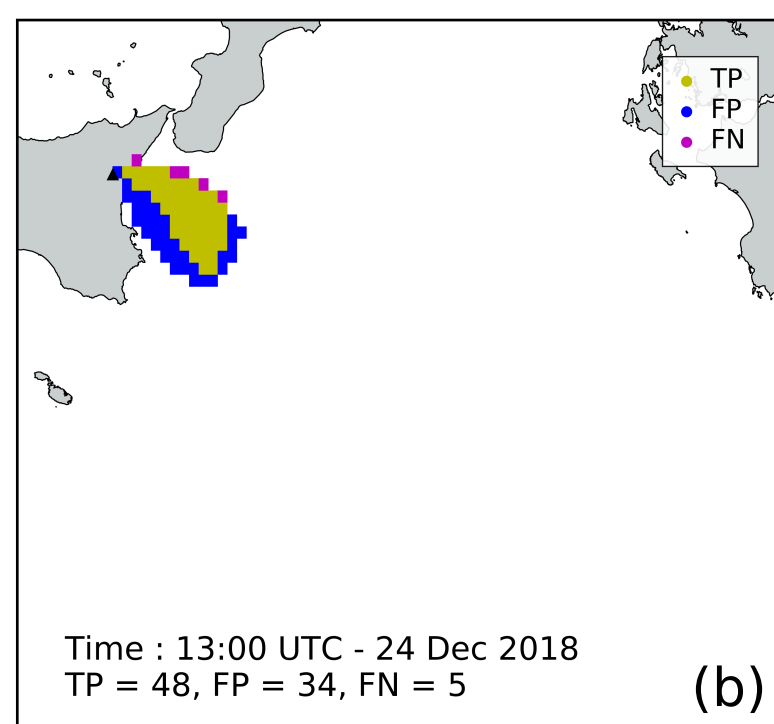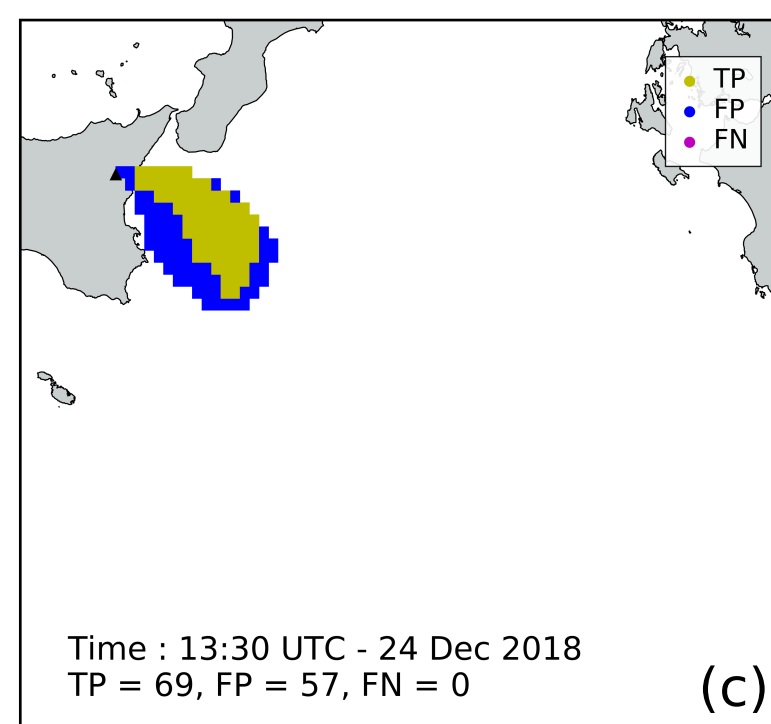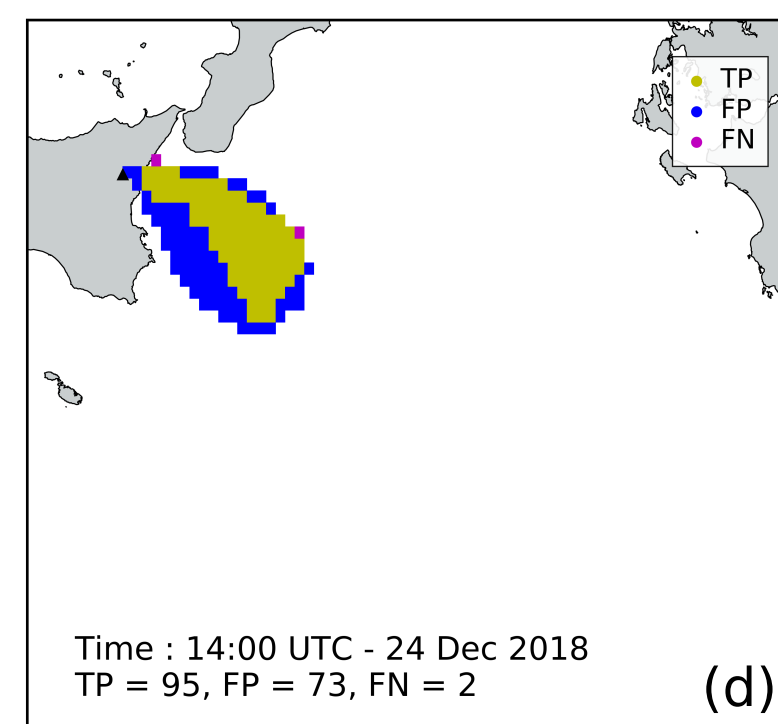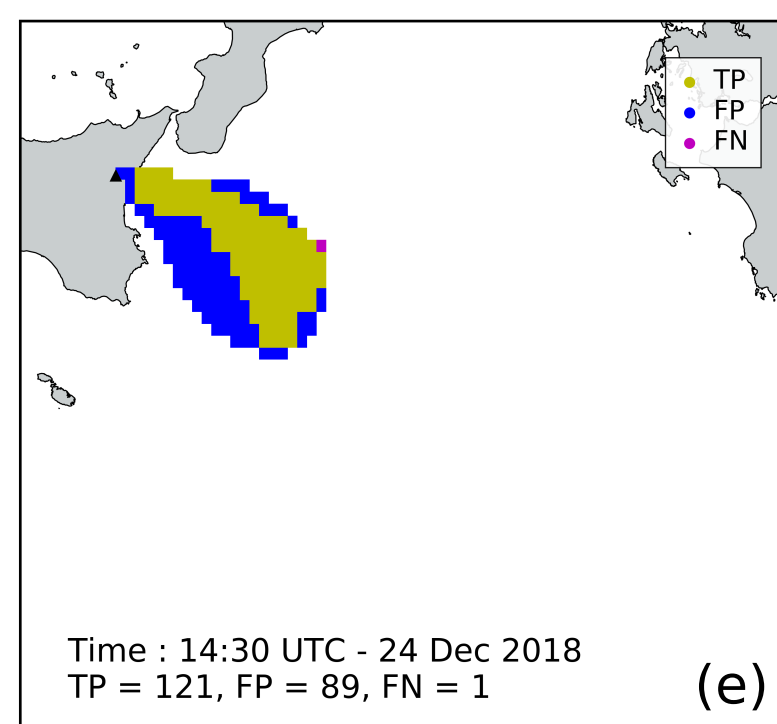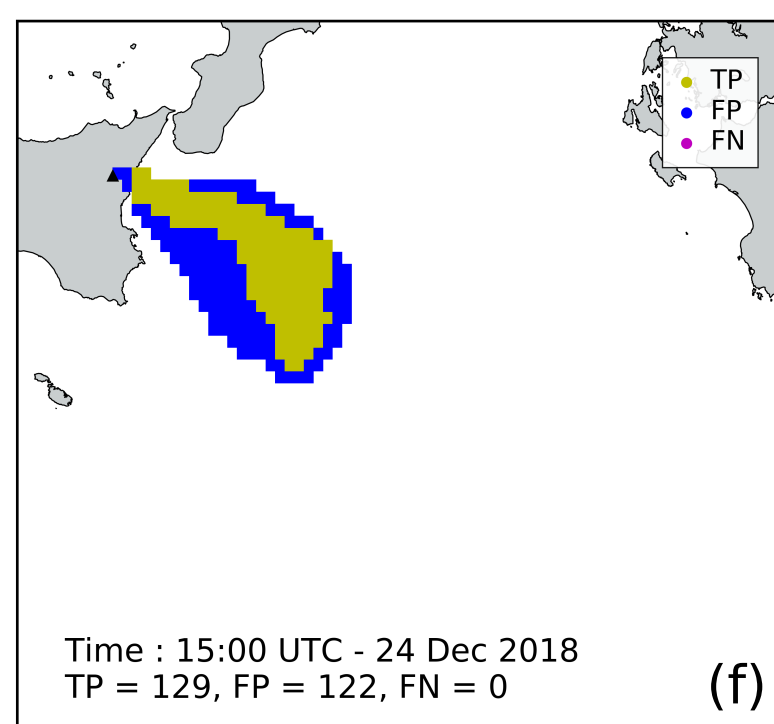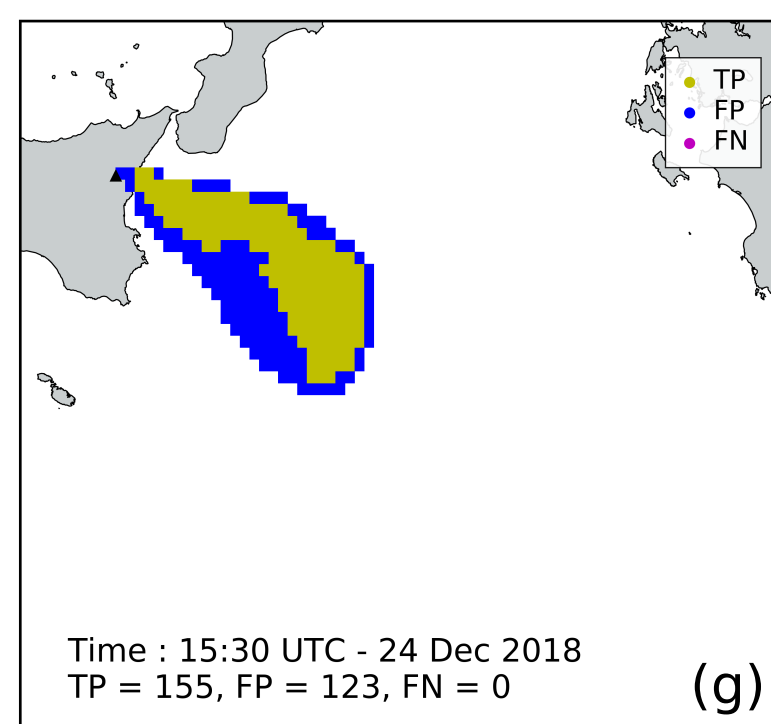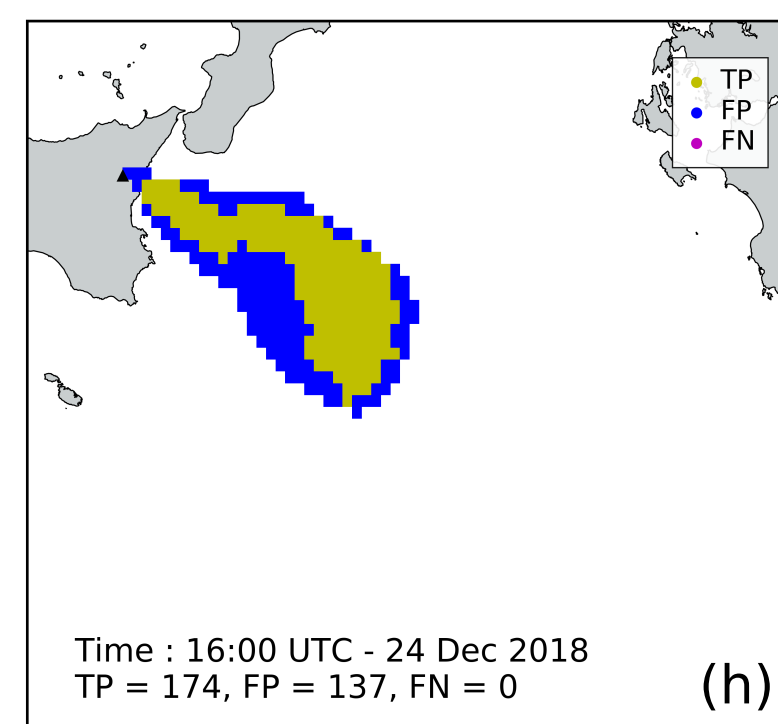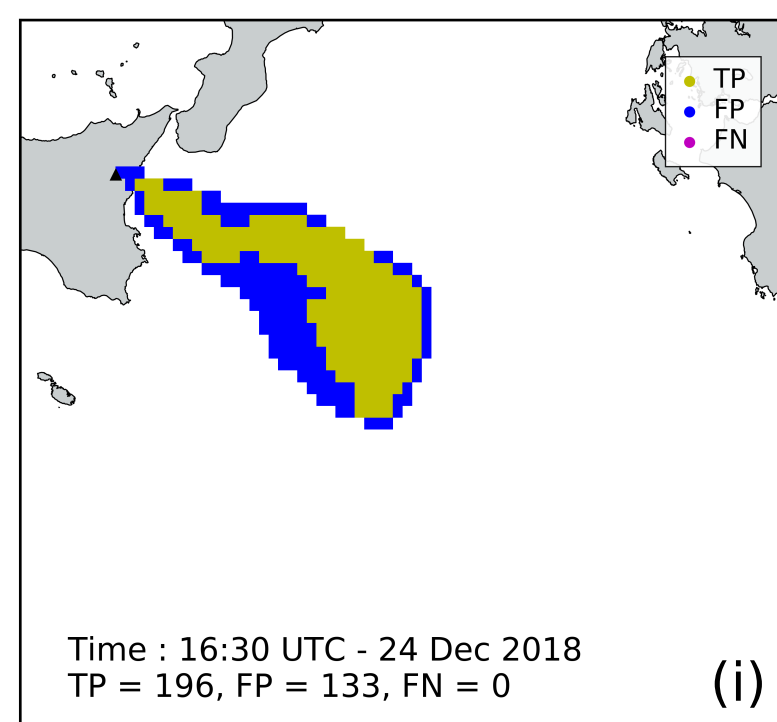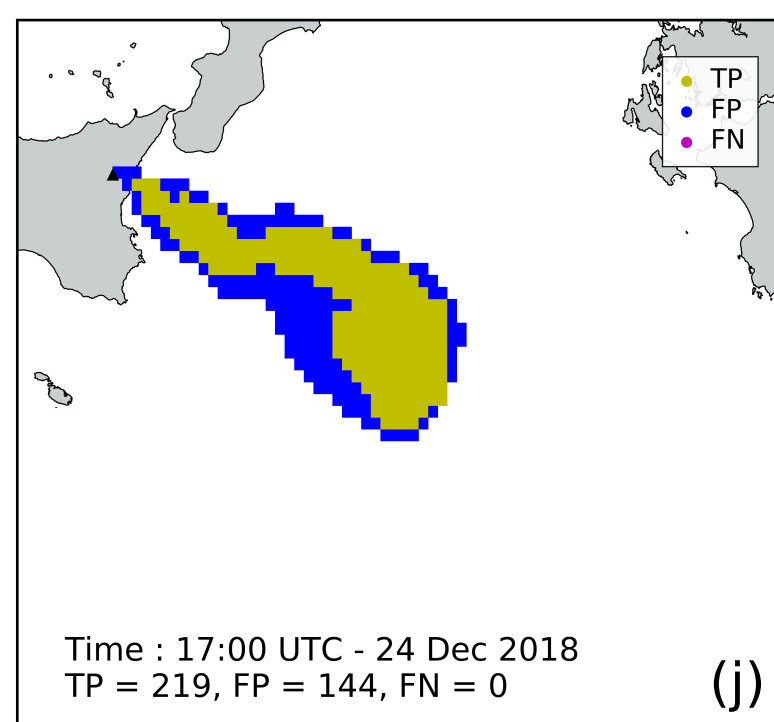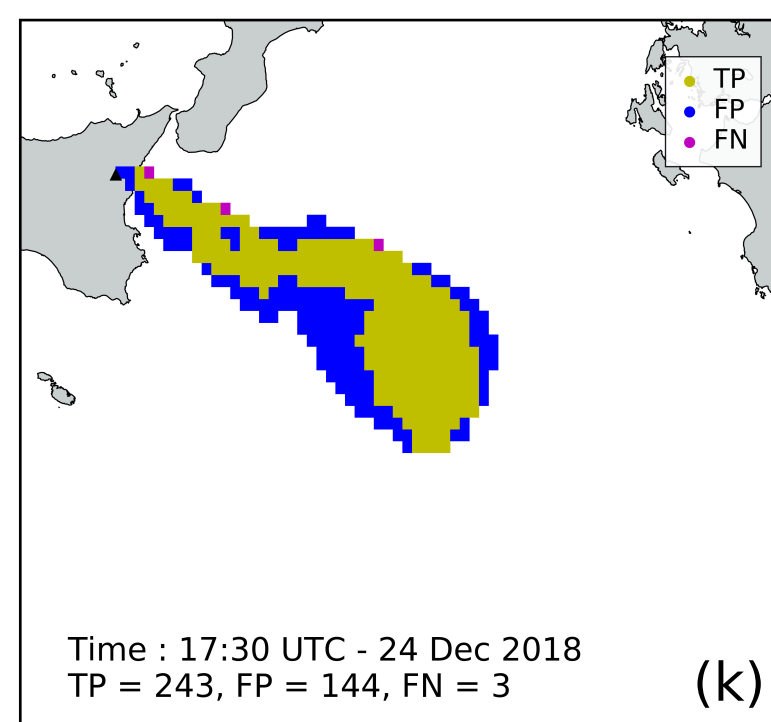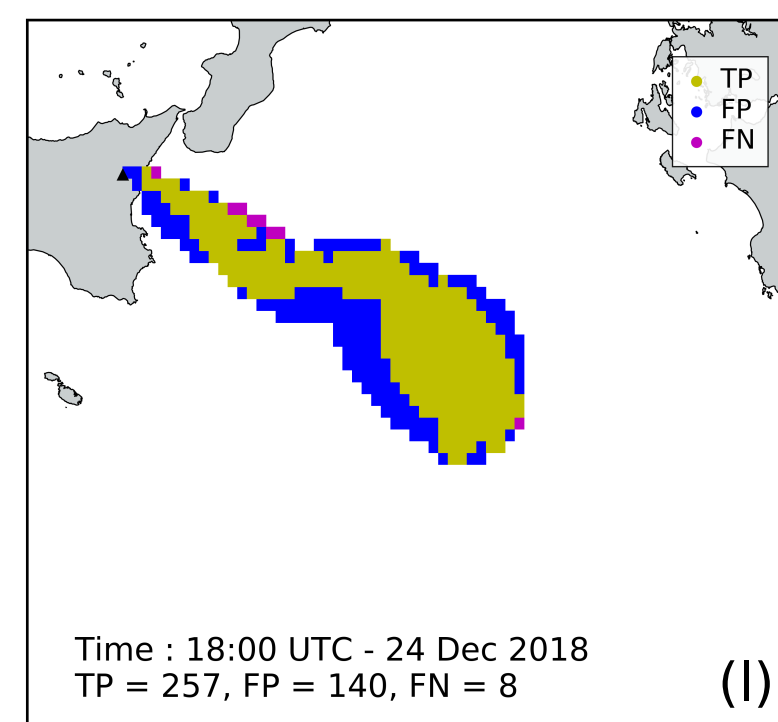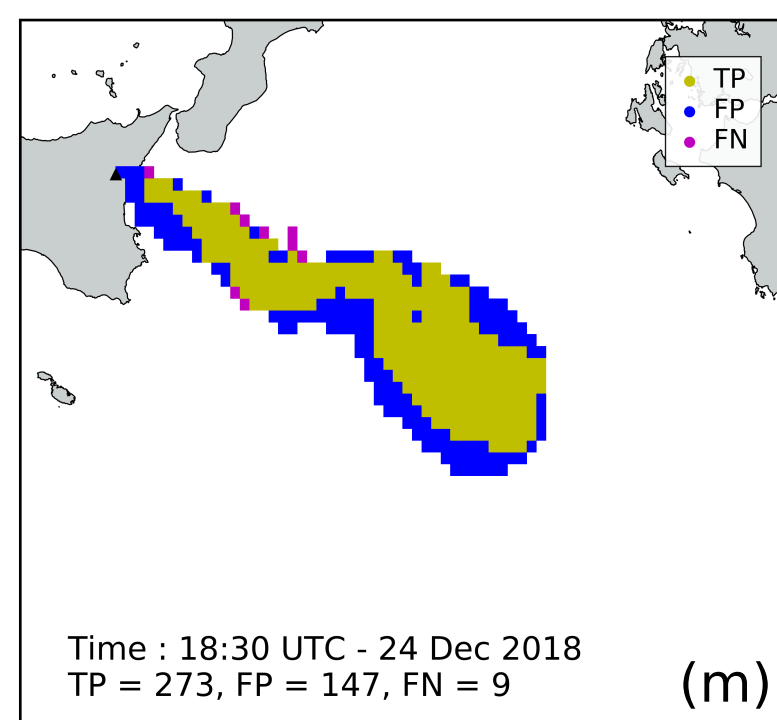

Supplement: s1 [file s1]

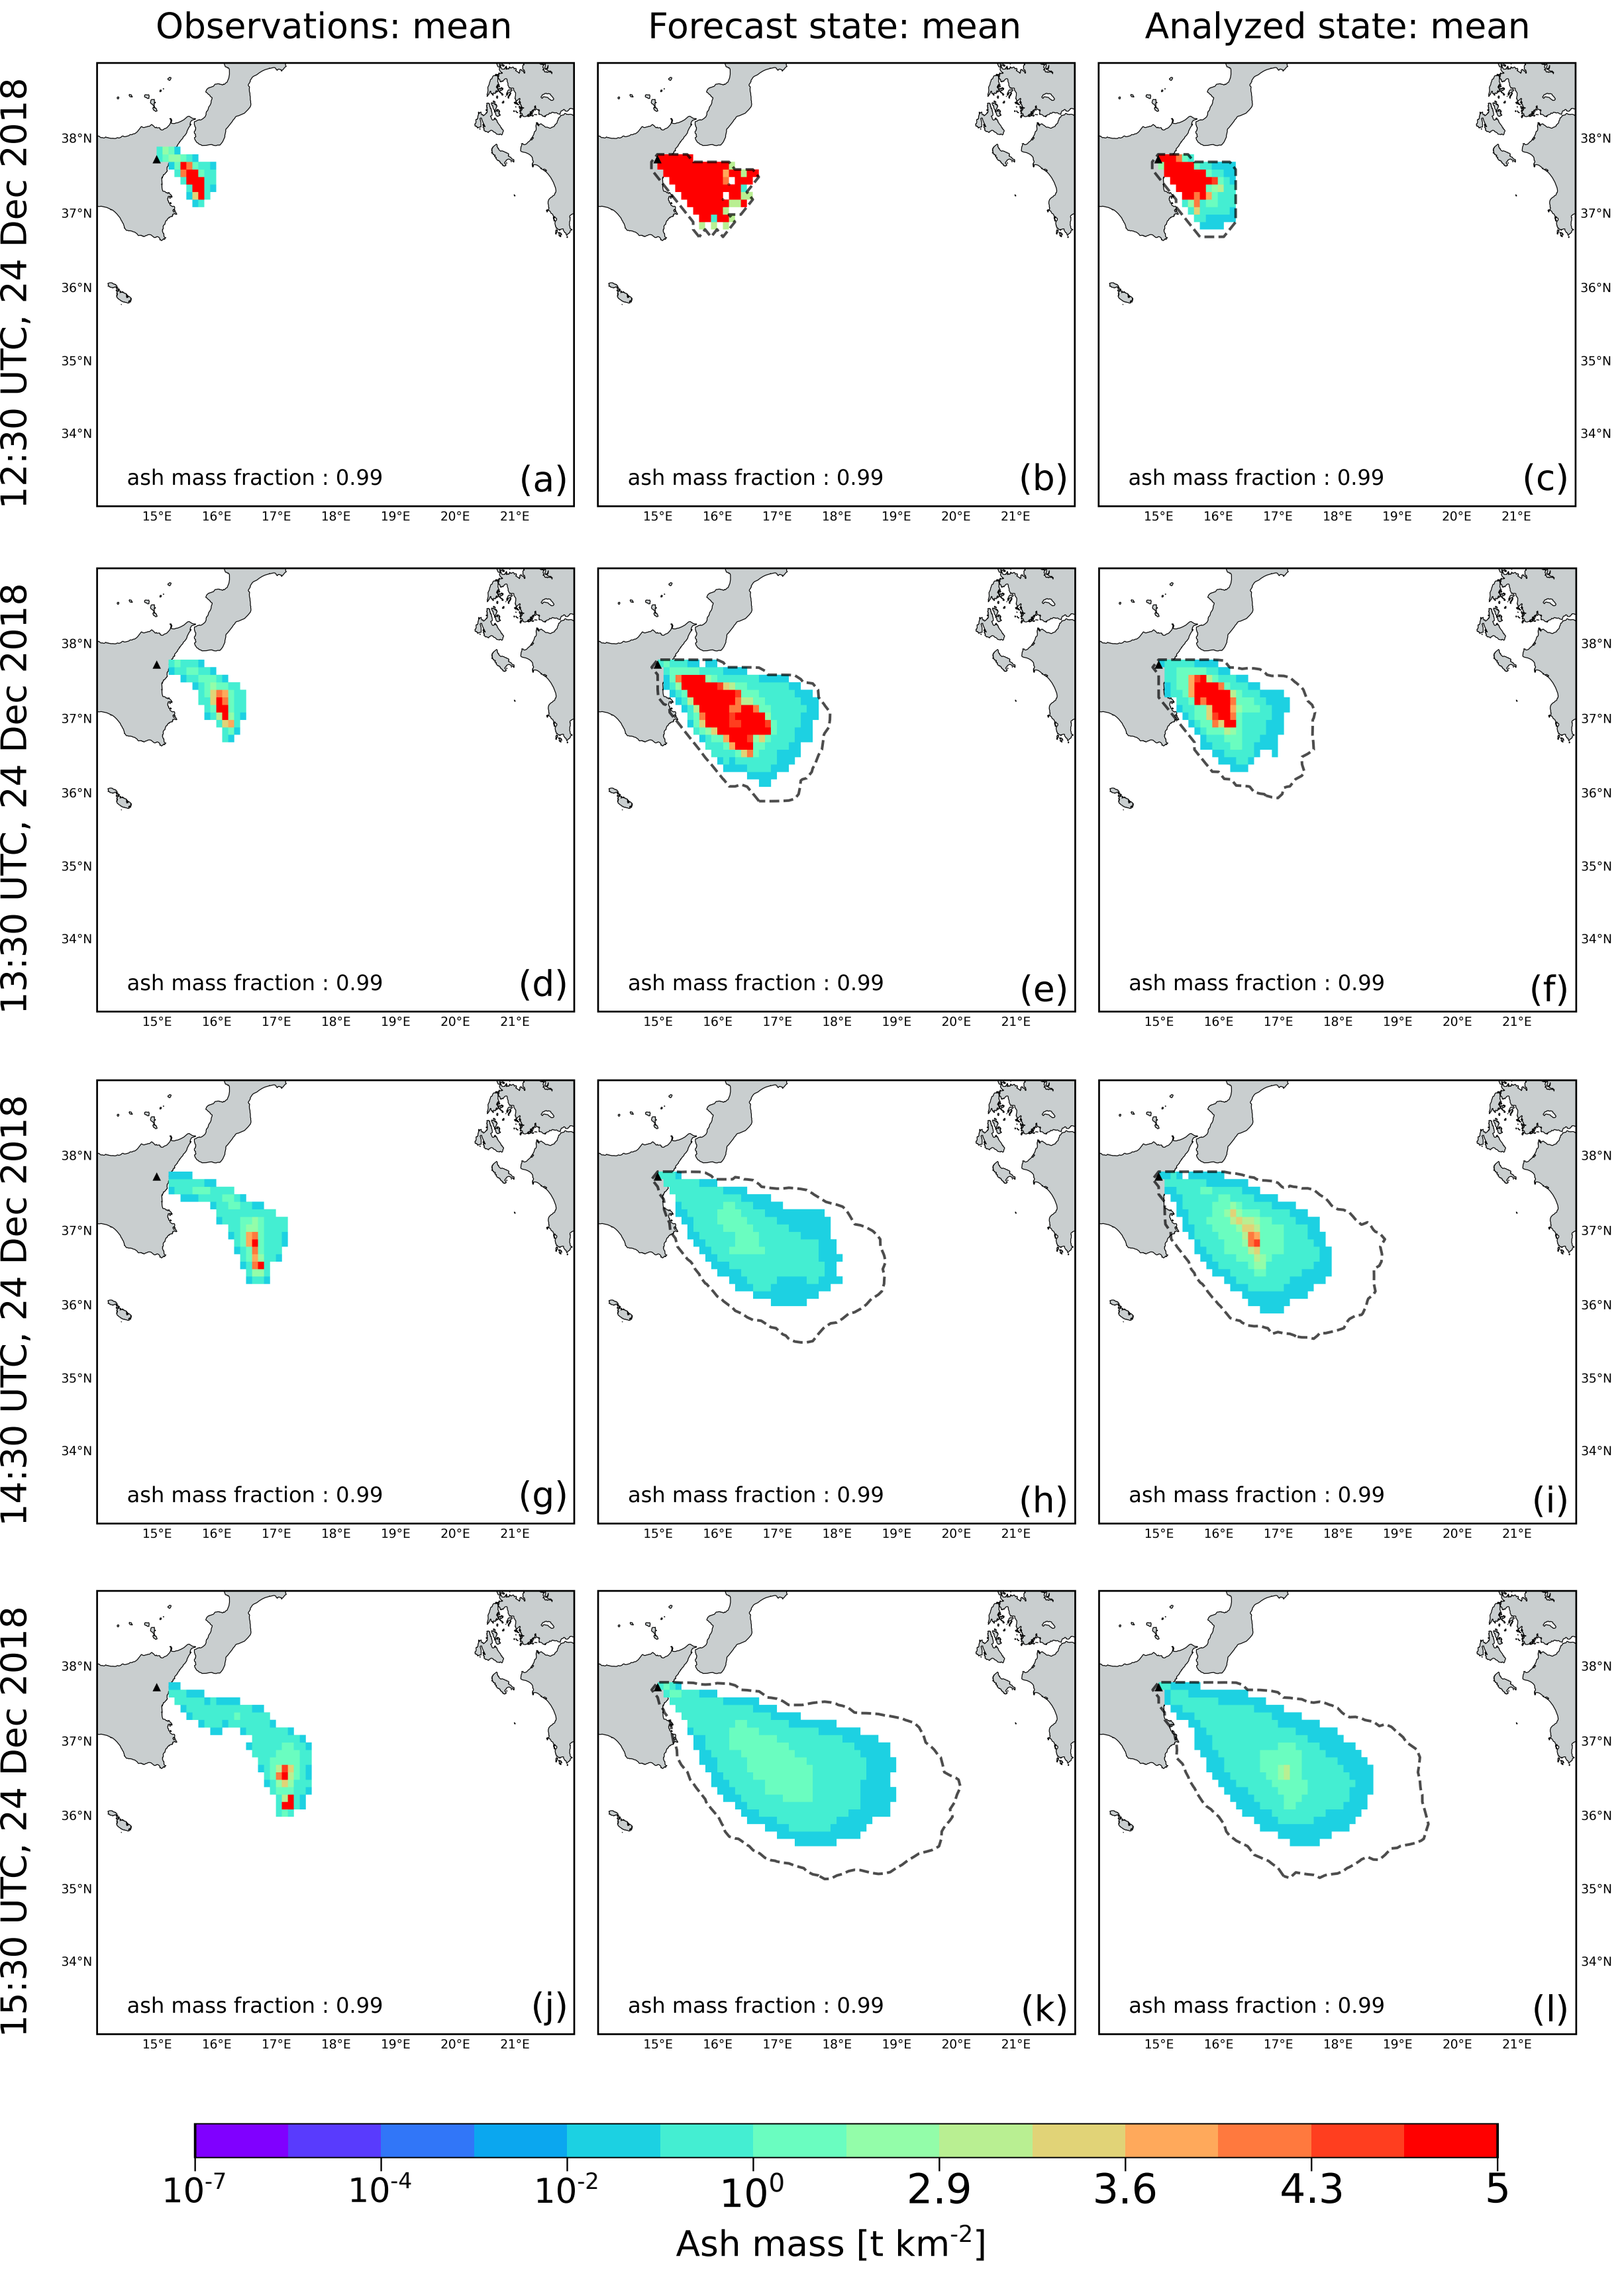

Supplement: s1 [file s1]

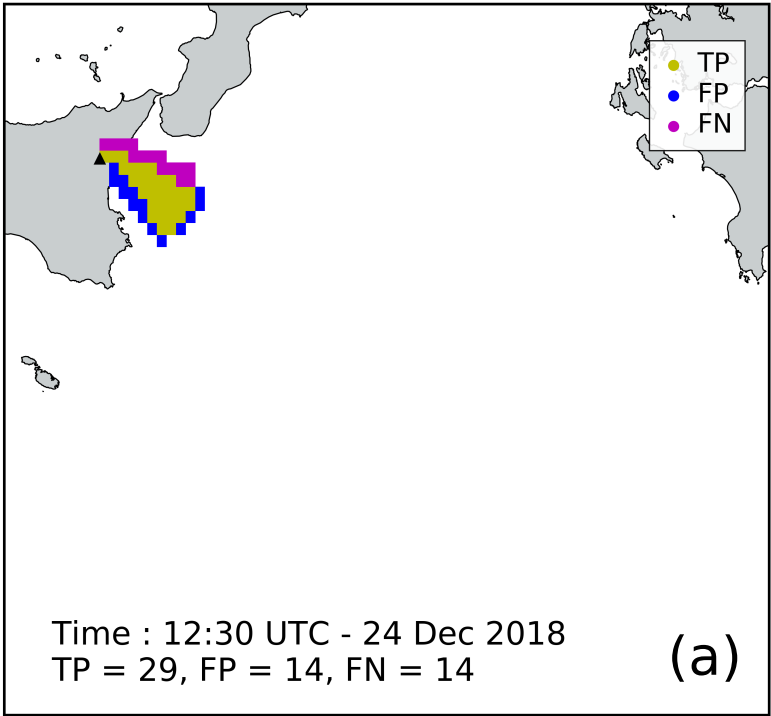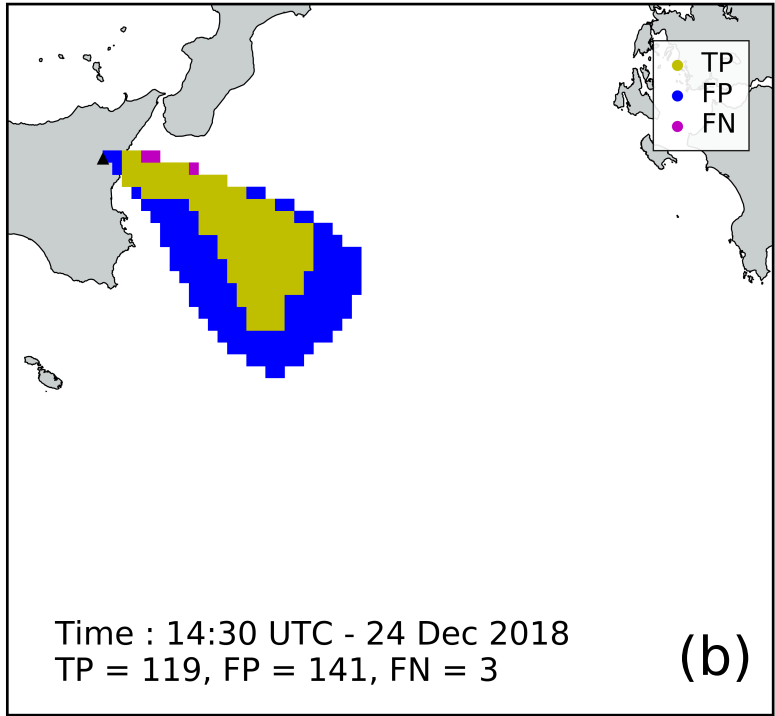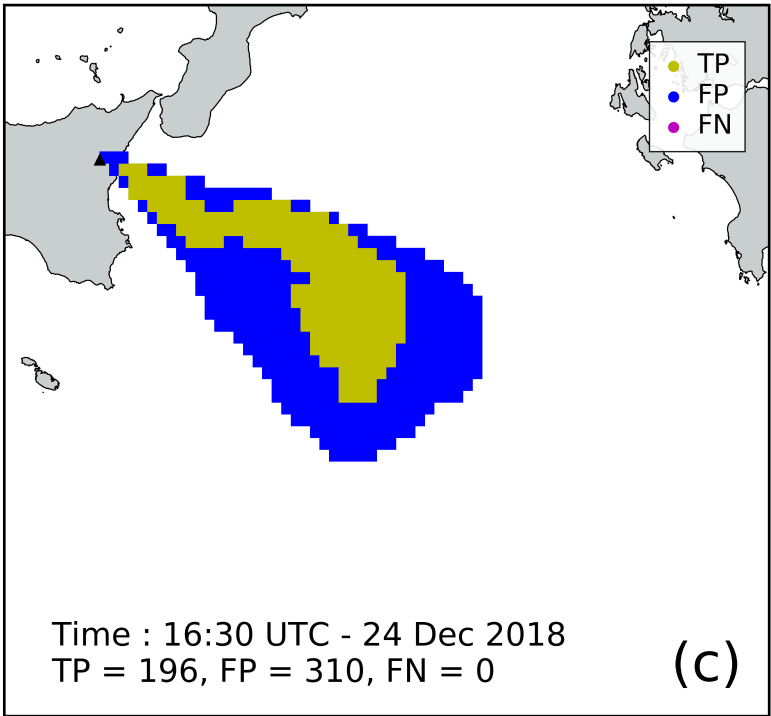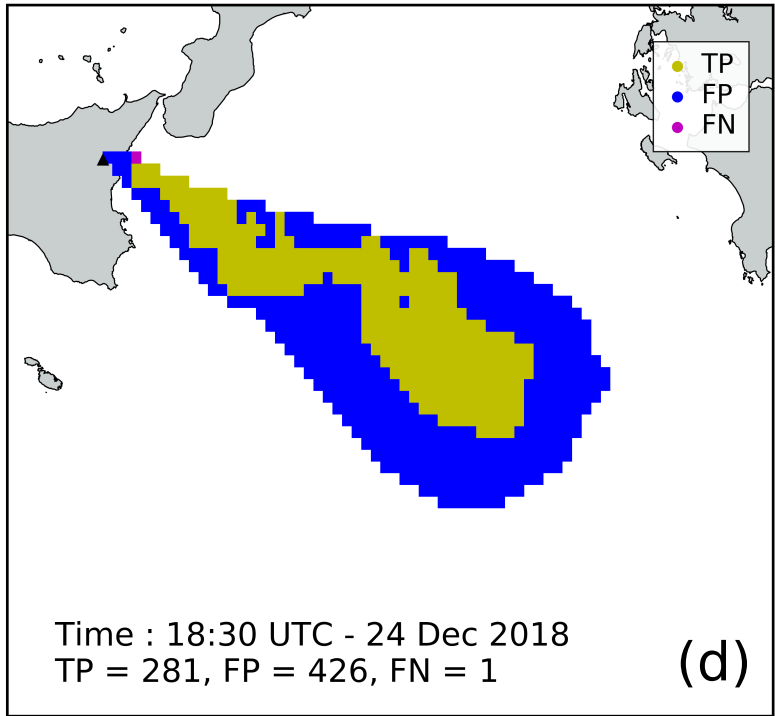

Supplement: s1 [file s1]

Observations: std

Forecast state: std

Analyzed state: std

16:30 UTC, 24 Dec 2018

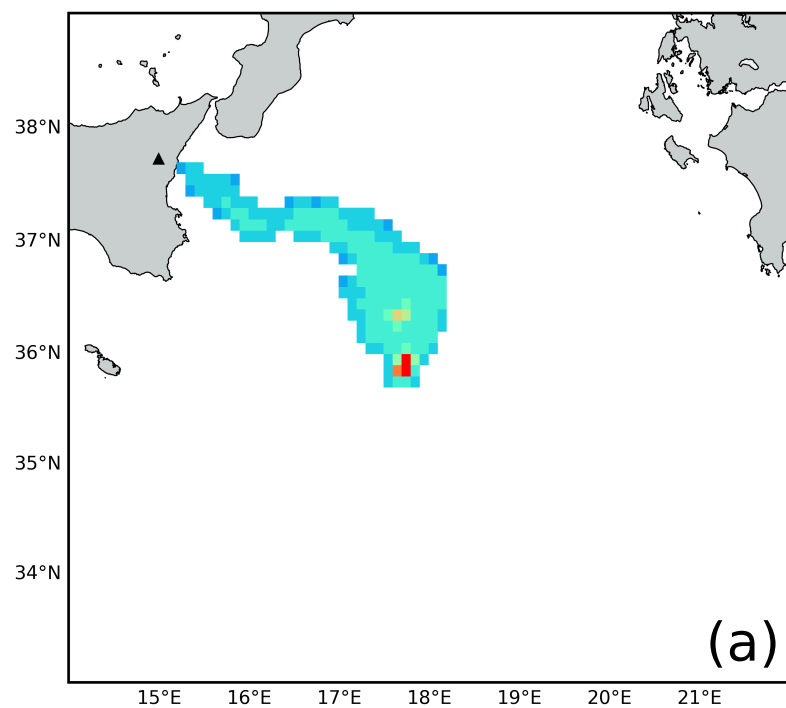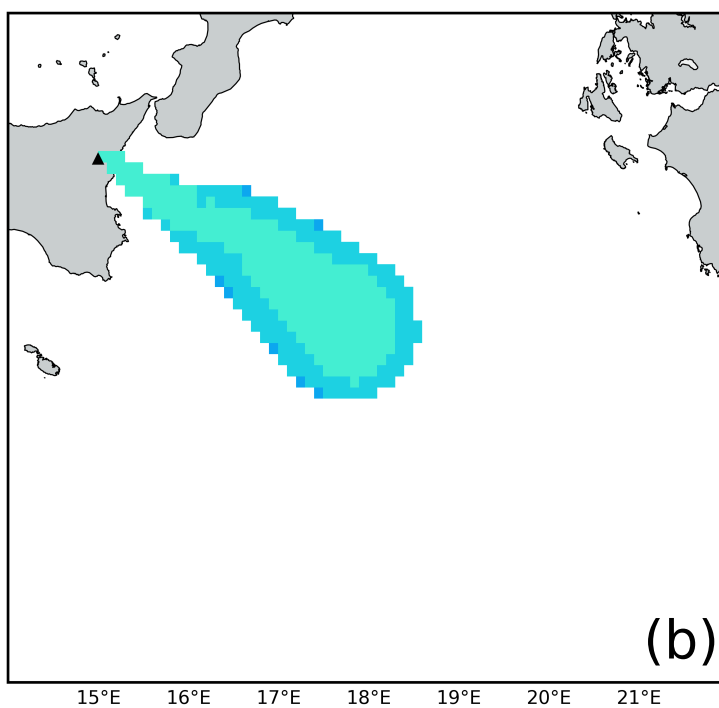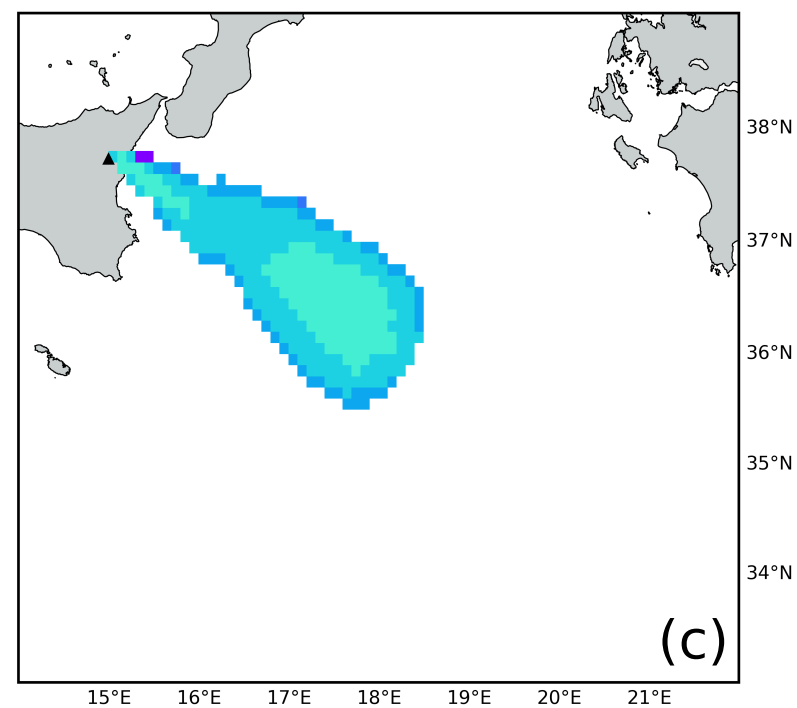

17:30 UTC, 24 Dec 2018

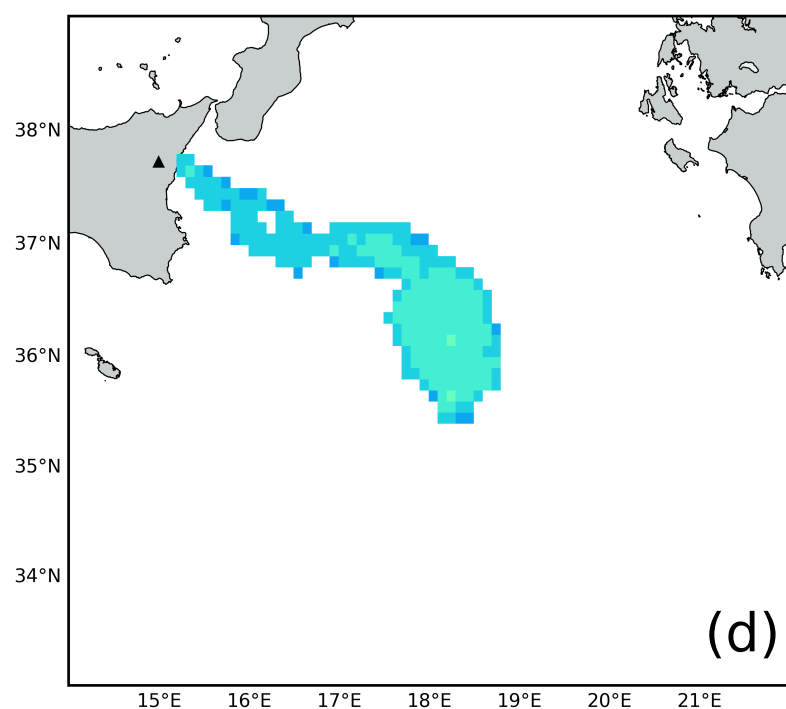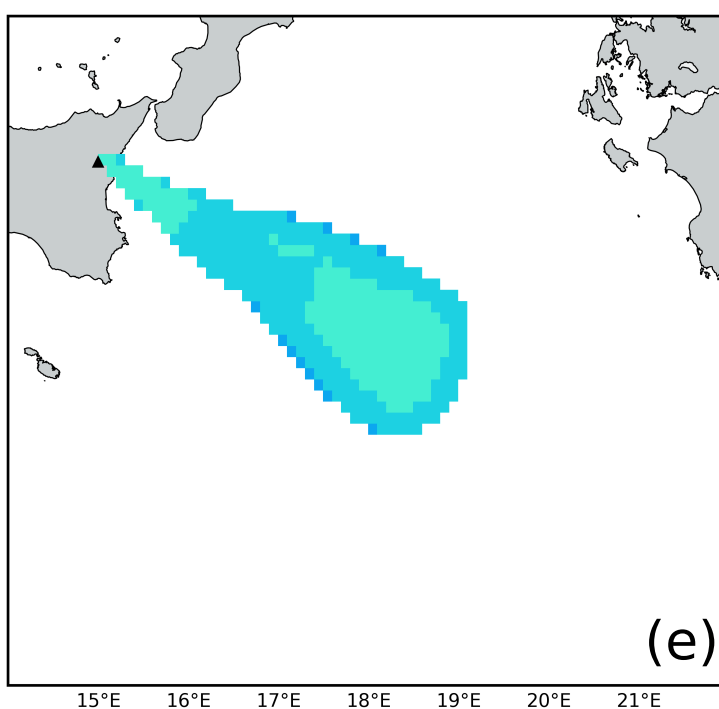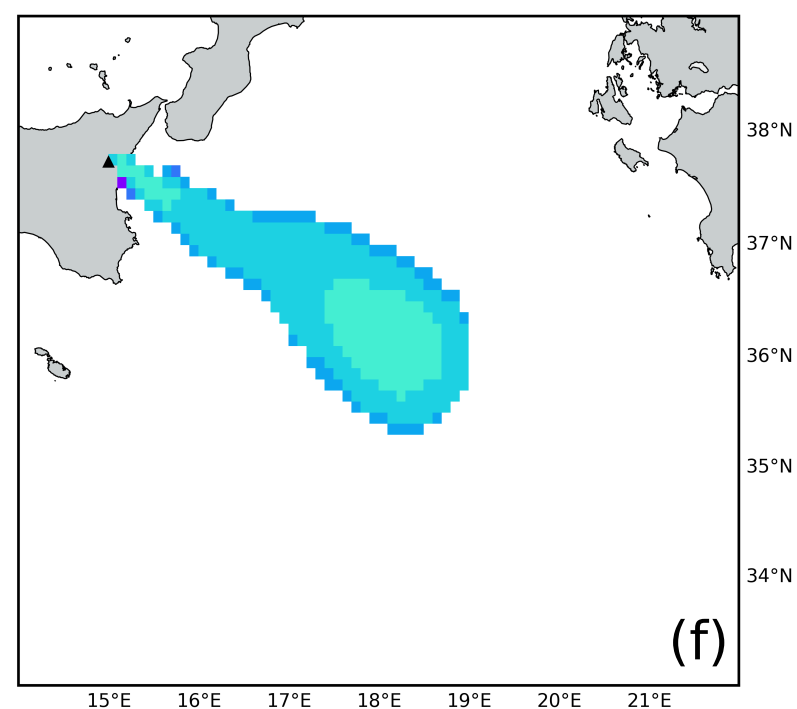

18:30 UTC, 24 Dec 2018

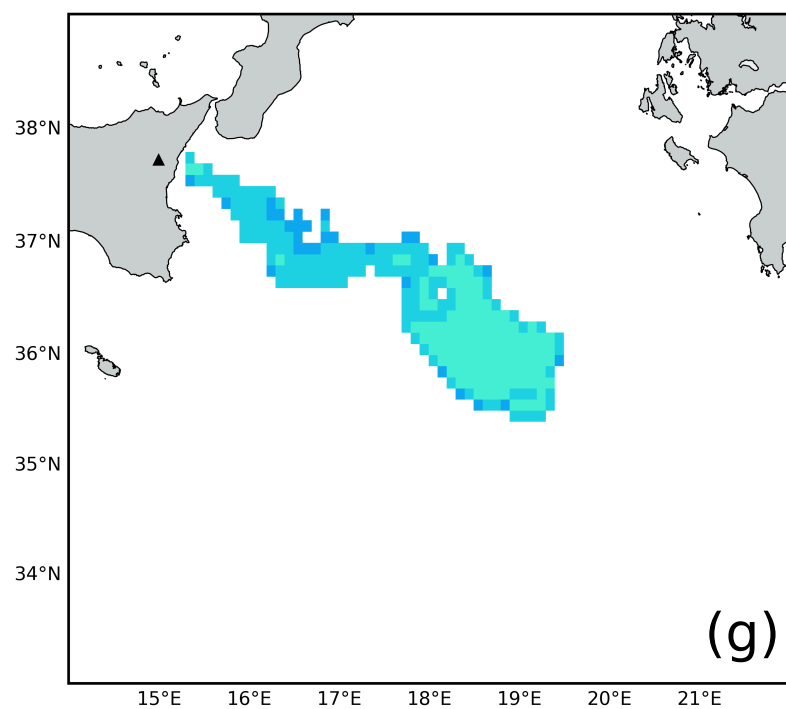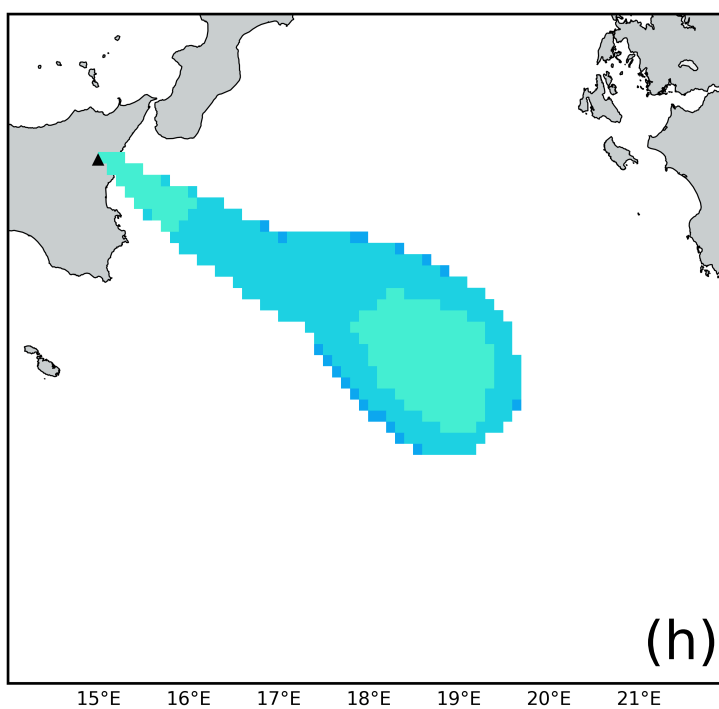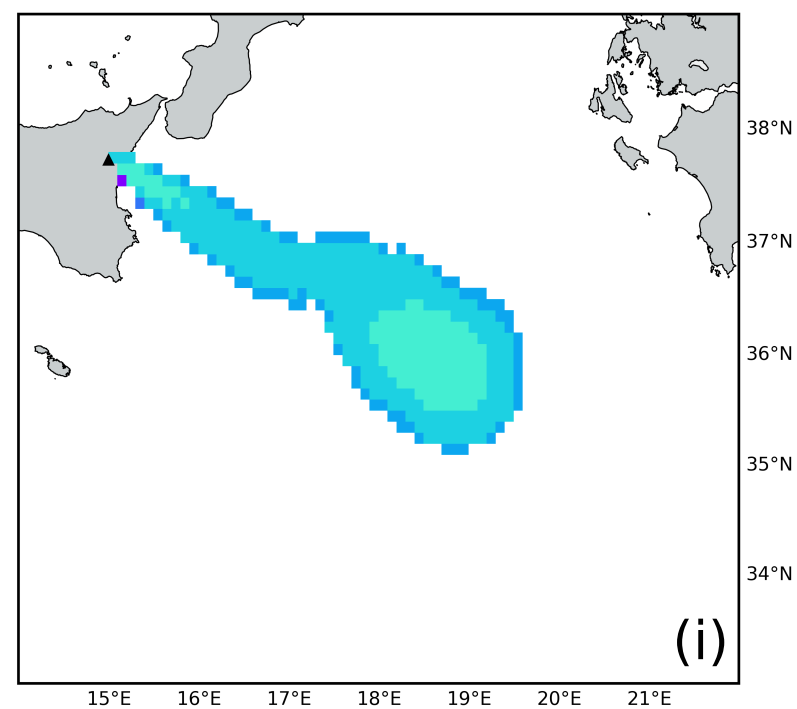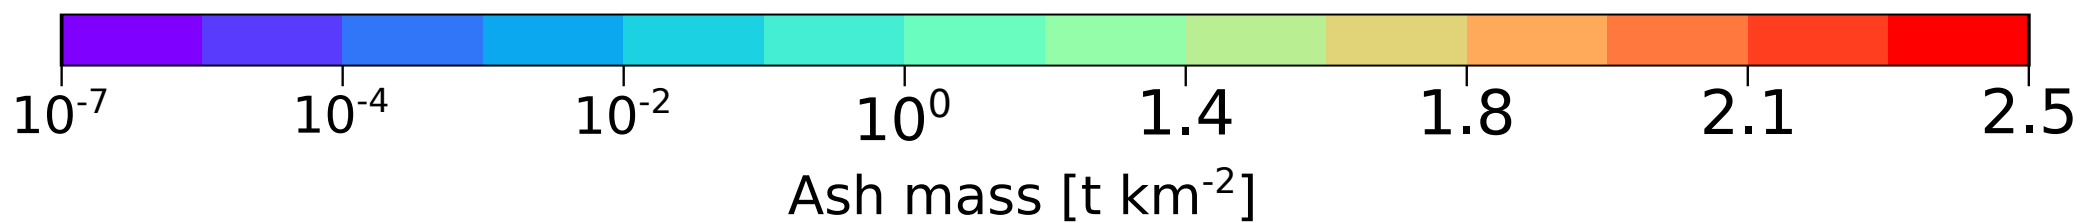

Supplement: s1 [file s1]

Observations: std

Forecast state: std

Analyzed state: std

16:30 UTC, 24 Dec 2018

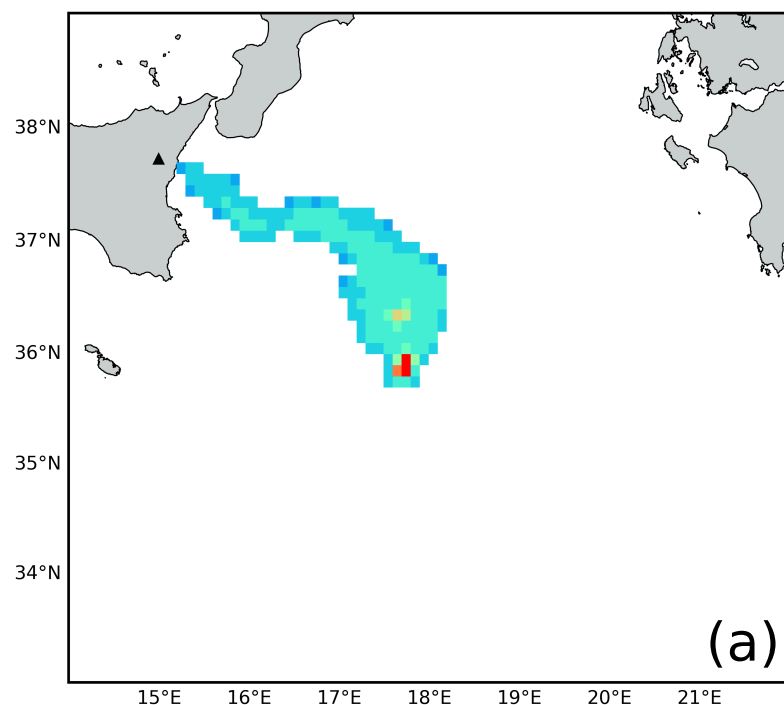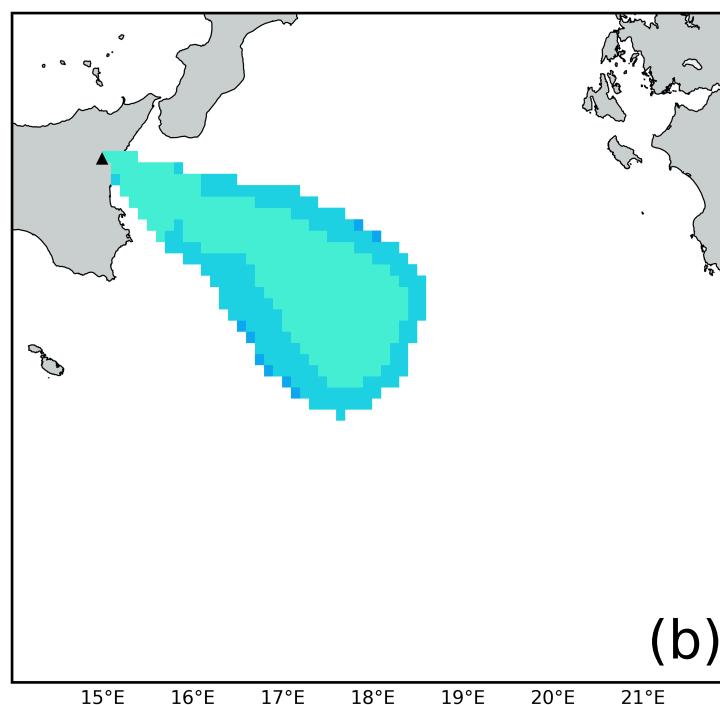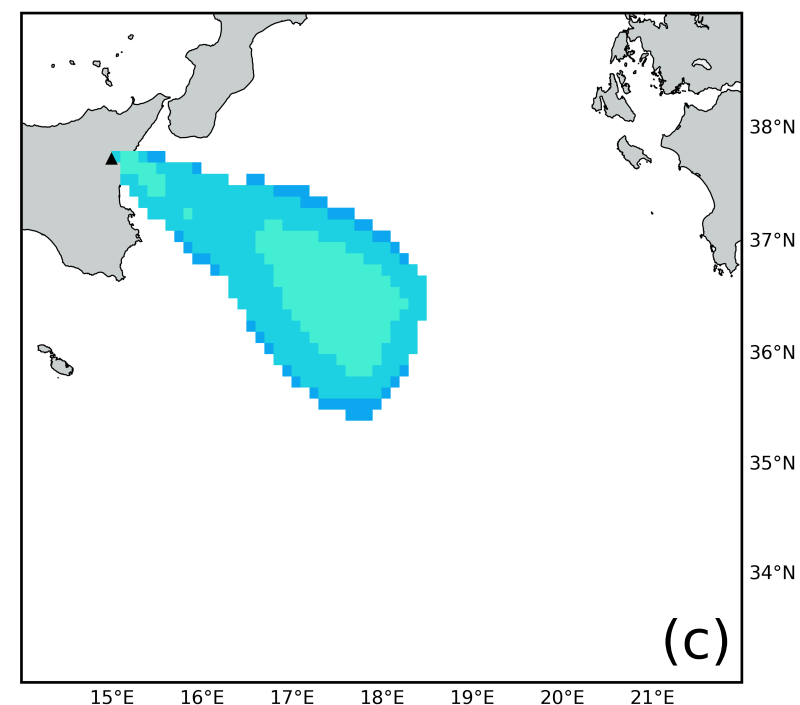

17:30 UTC, 24 Dec 2018

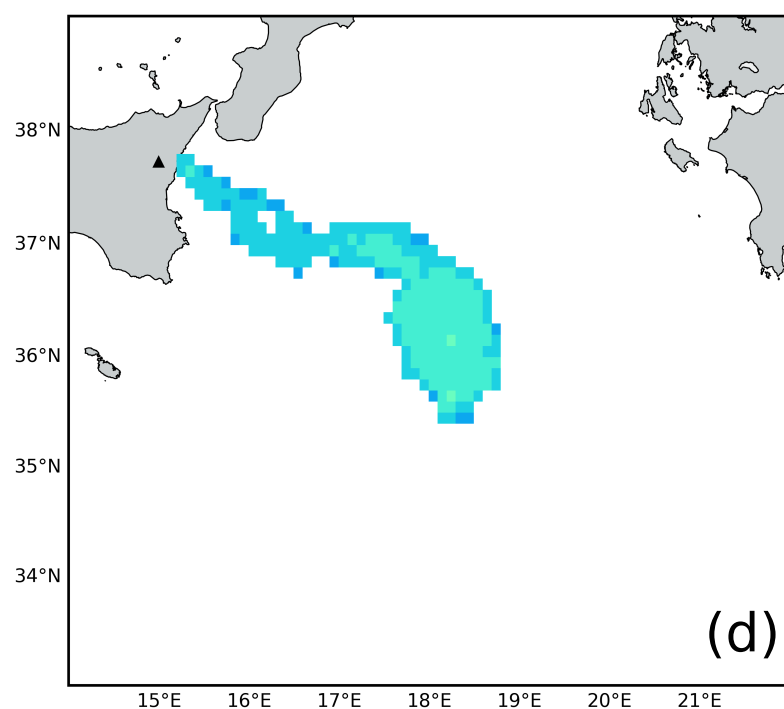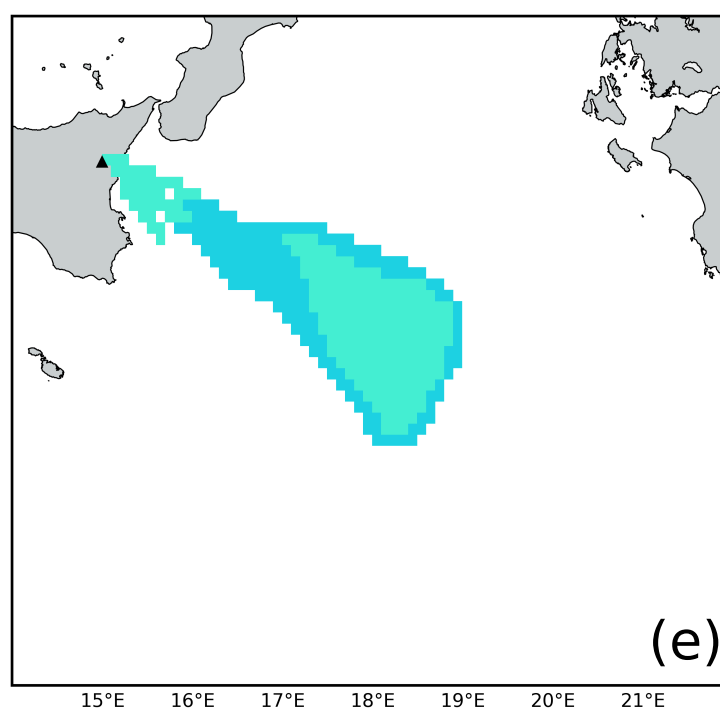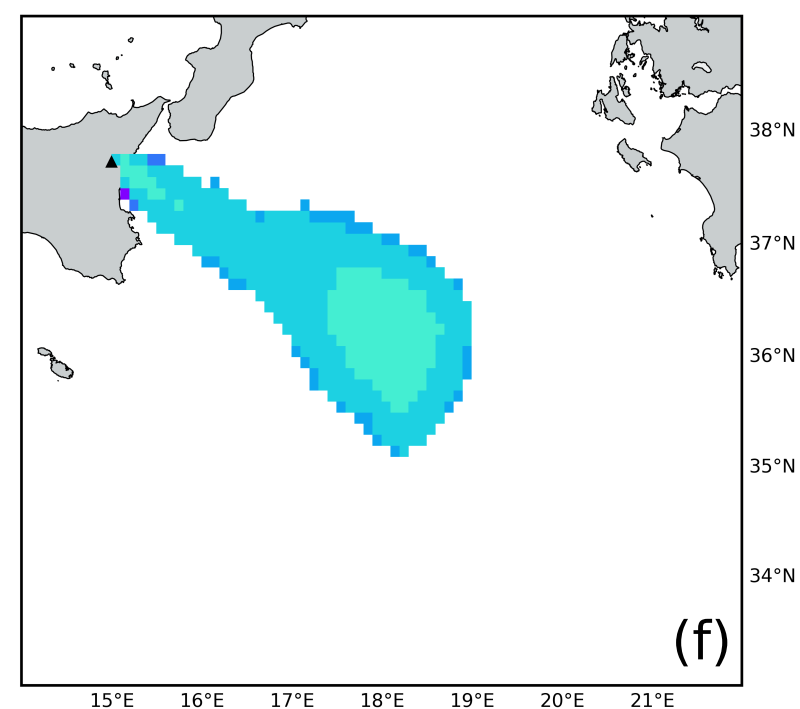

18:30 UTC, 24 Dec 2018

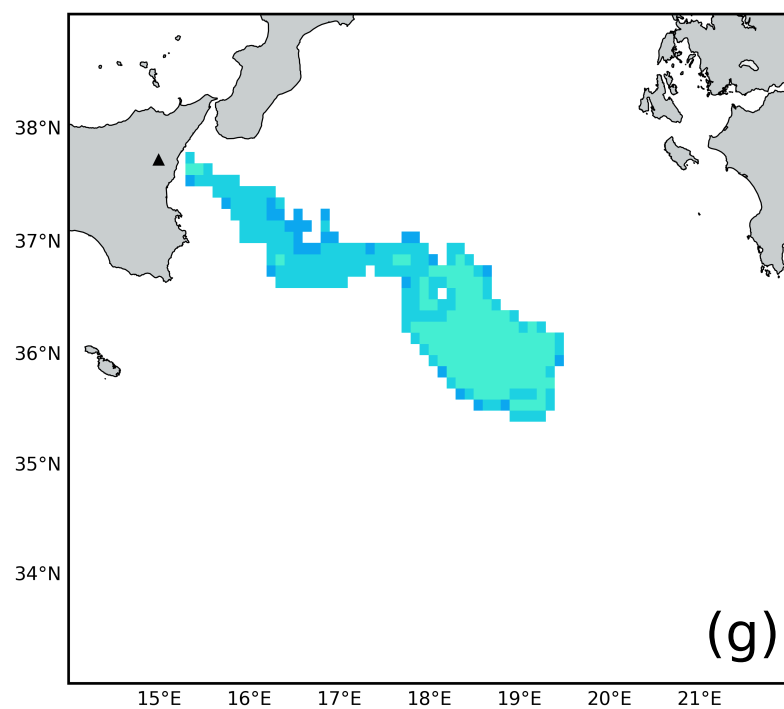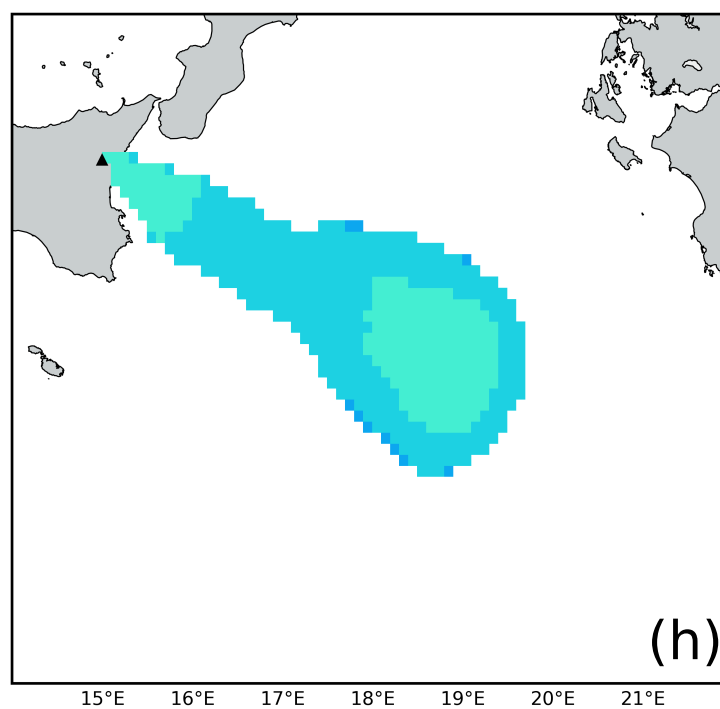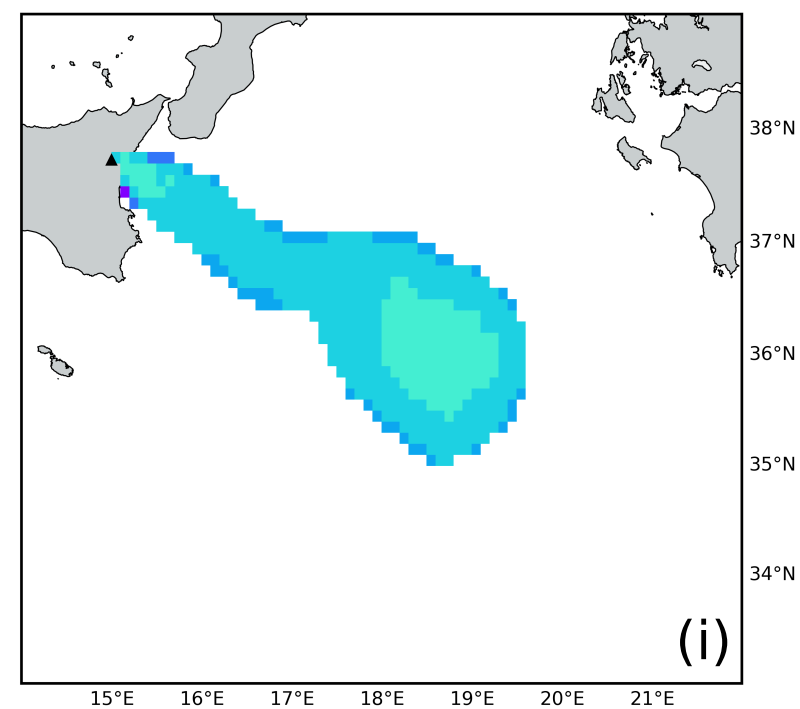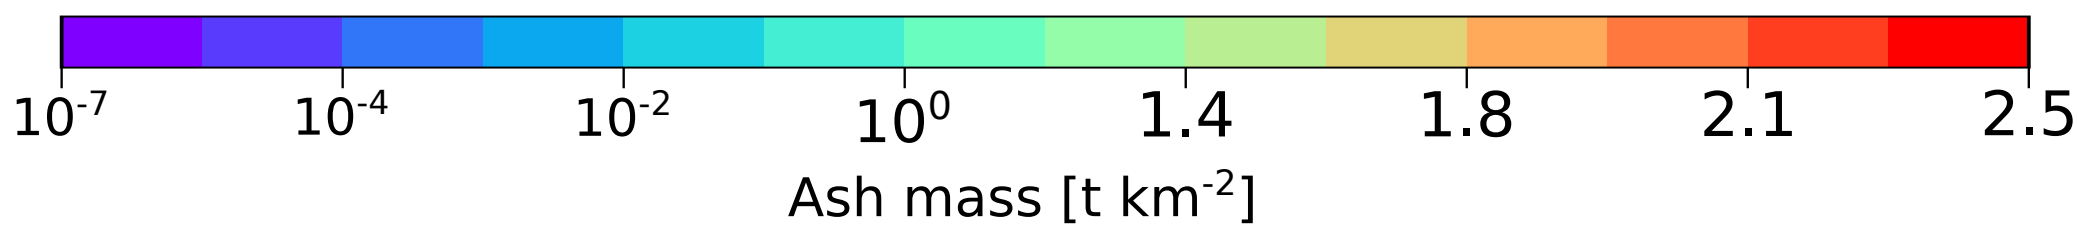

Supplement: s1 [file s1]

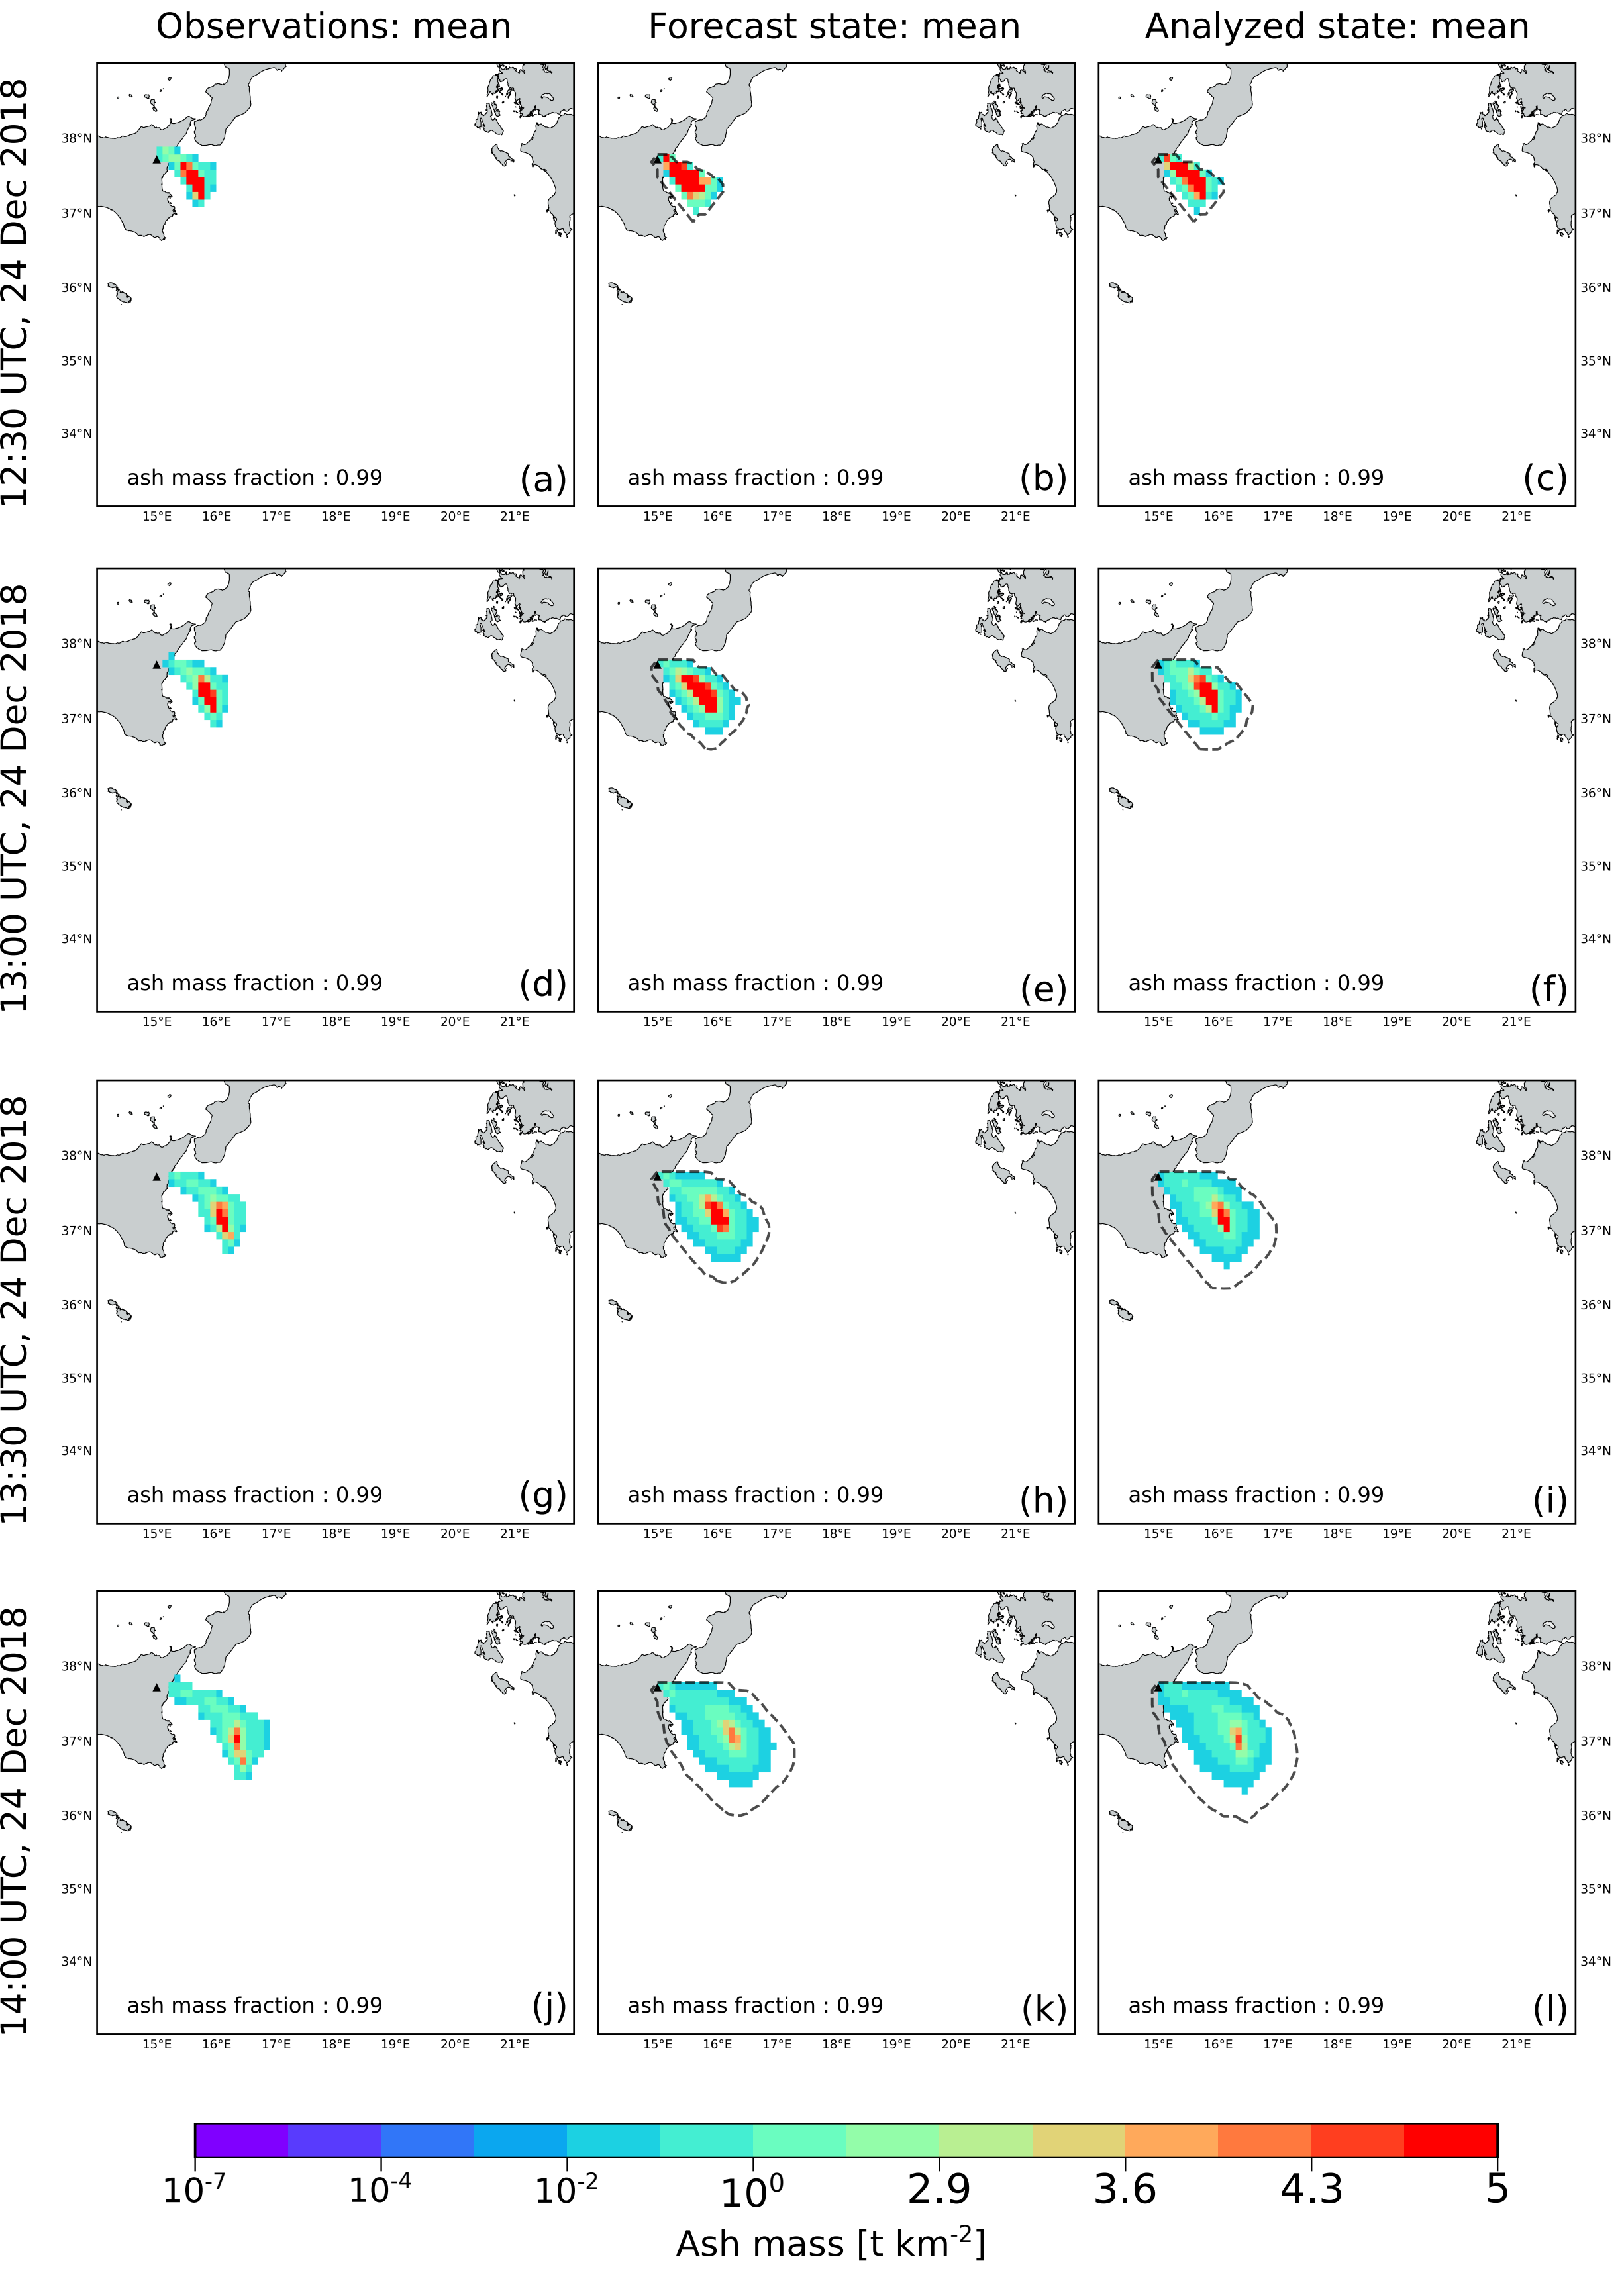

Supplement: s1 [file s1]

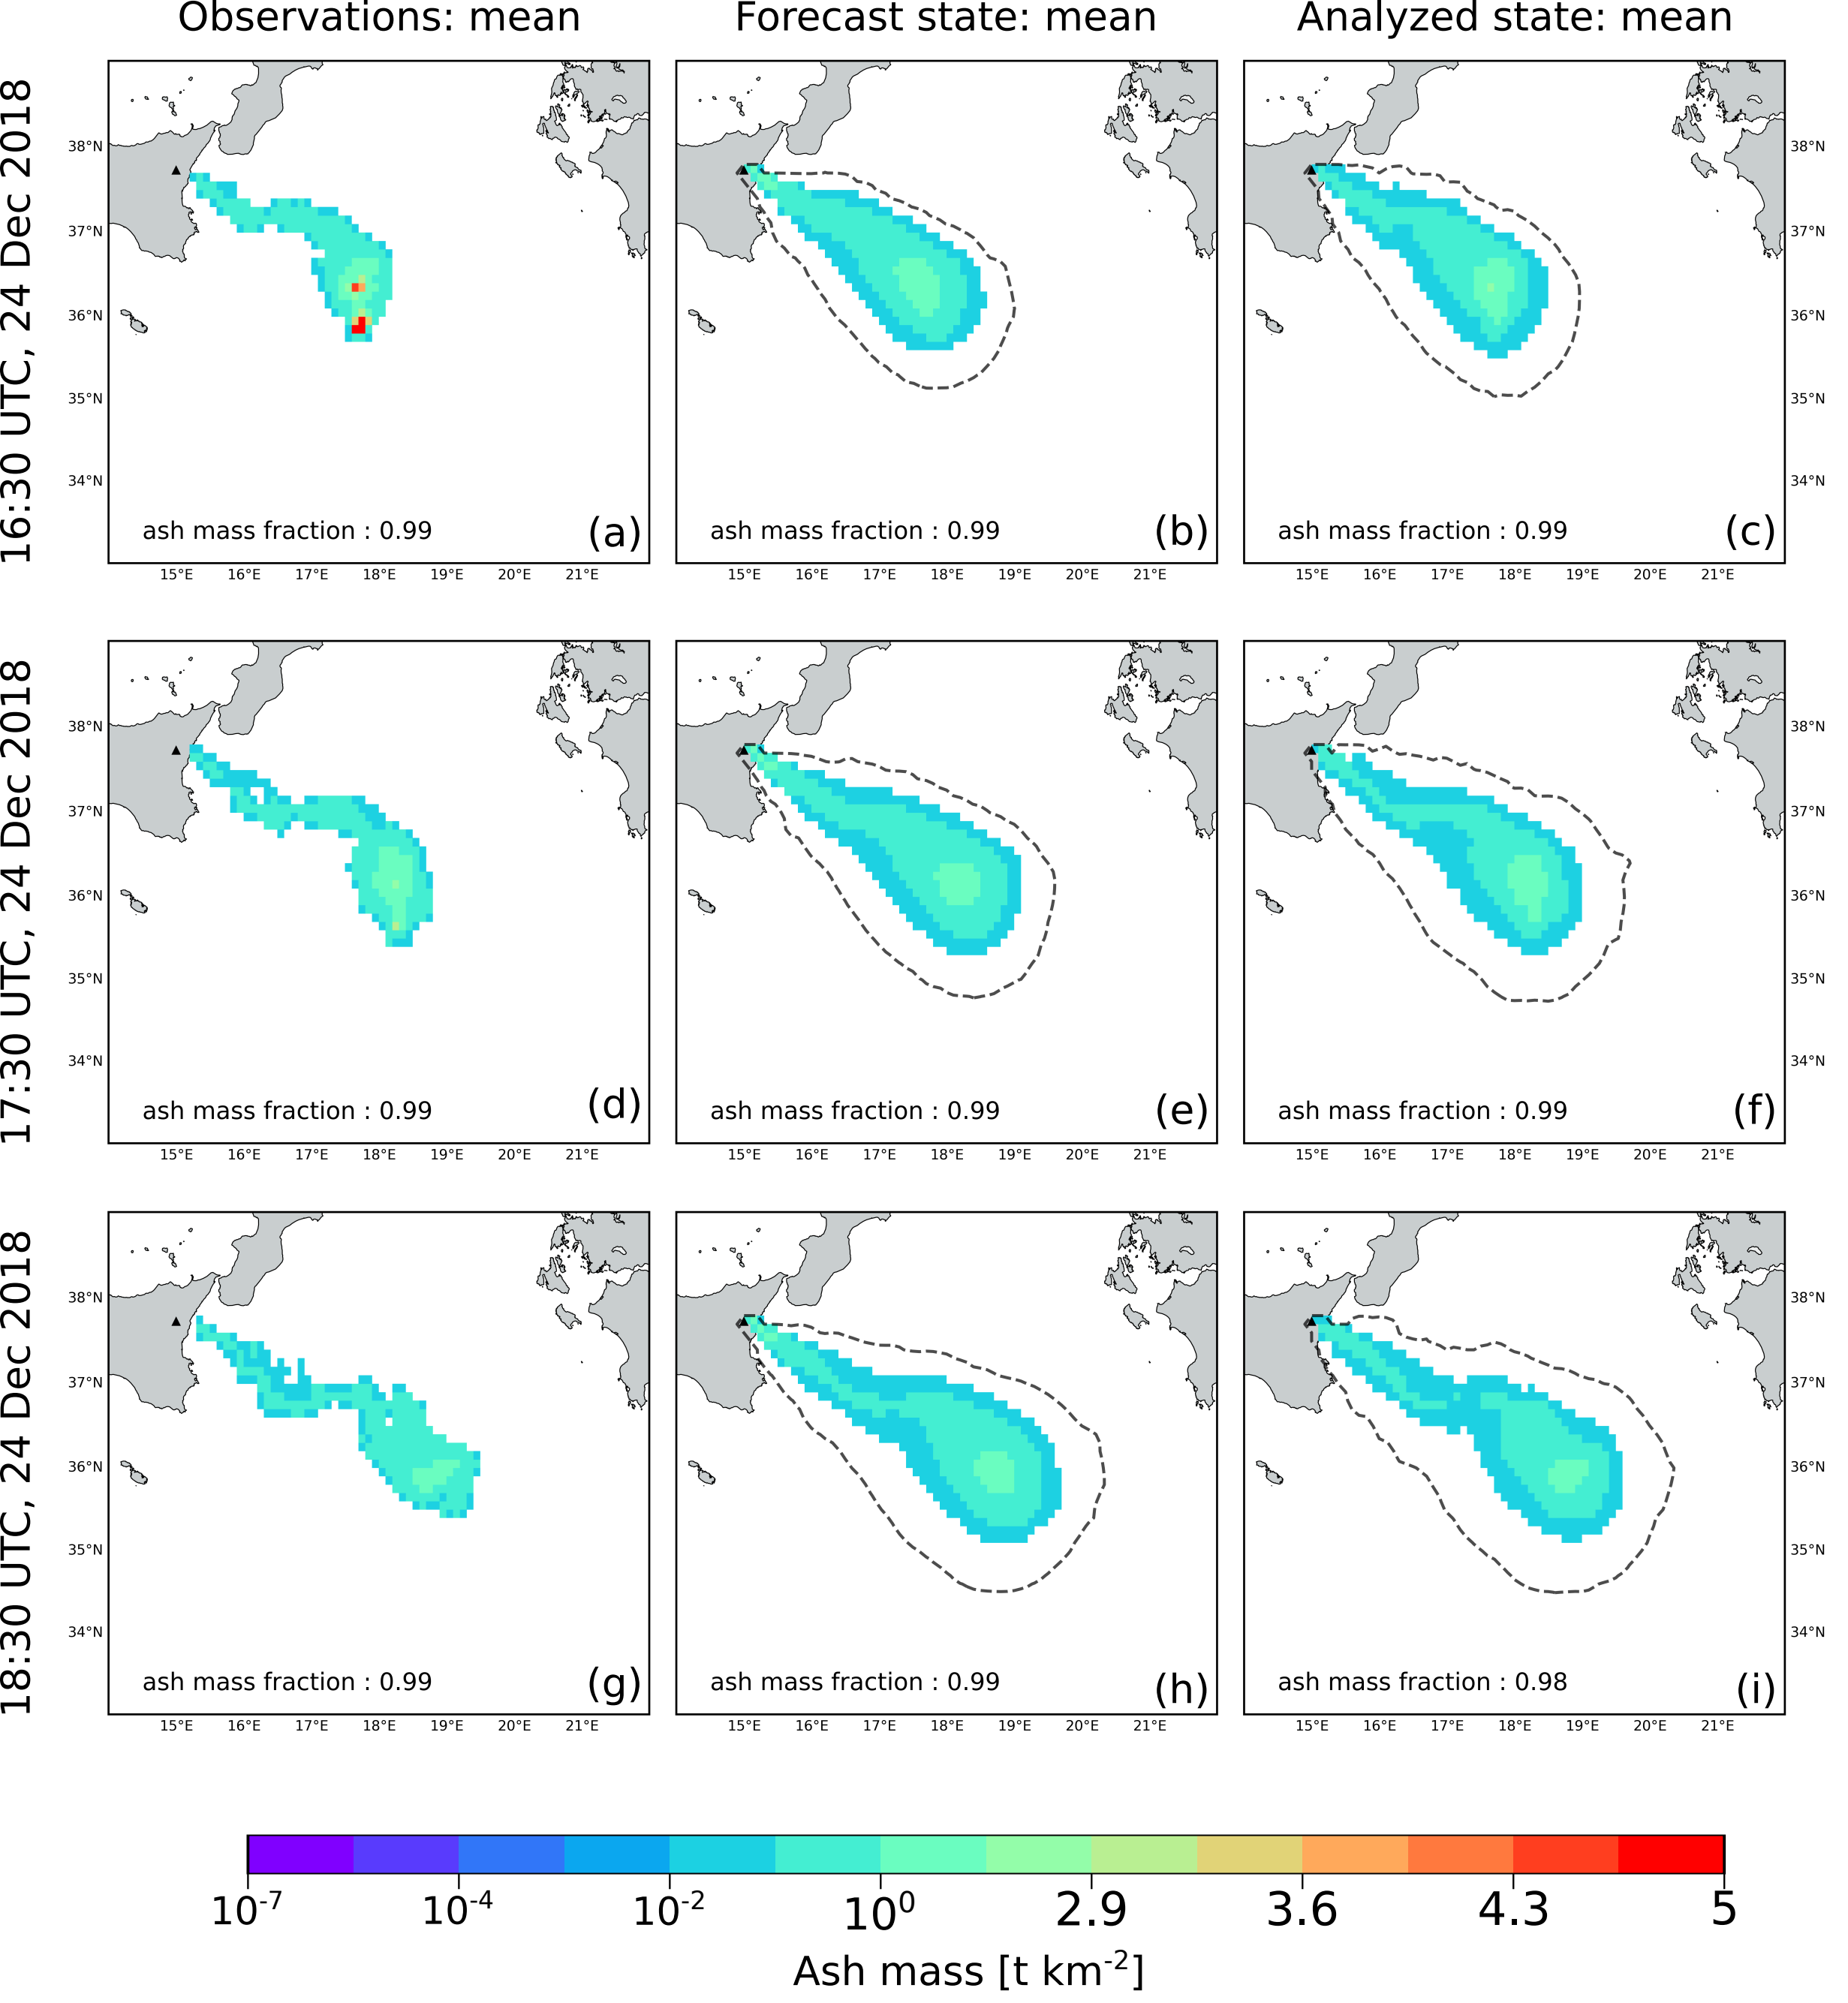

Supplement: s1 [file s1]

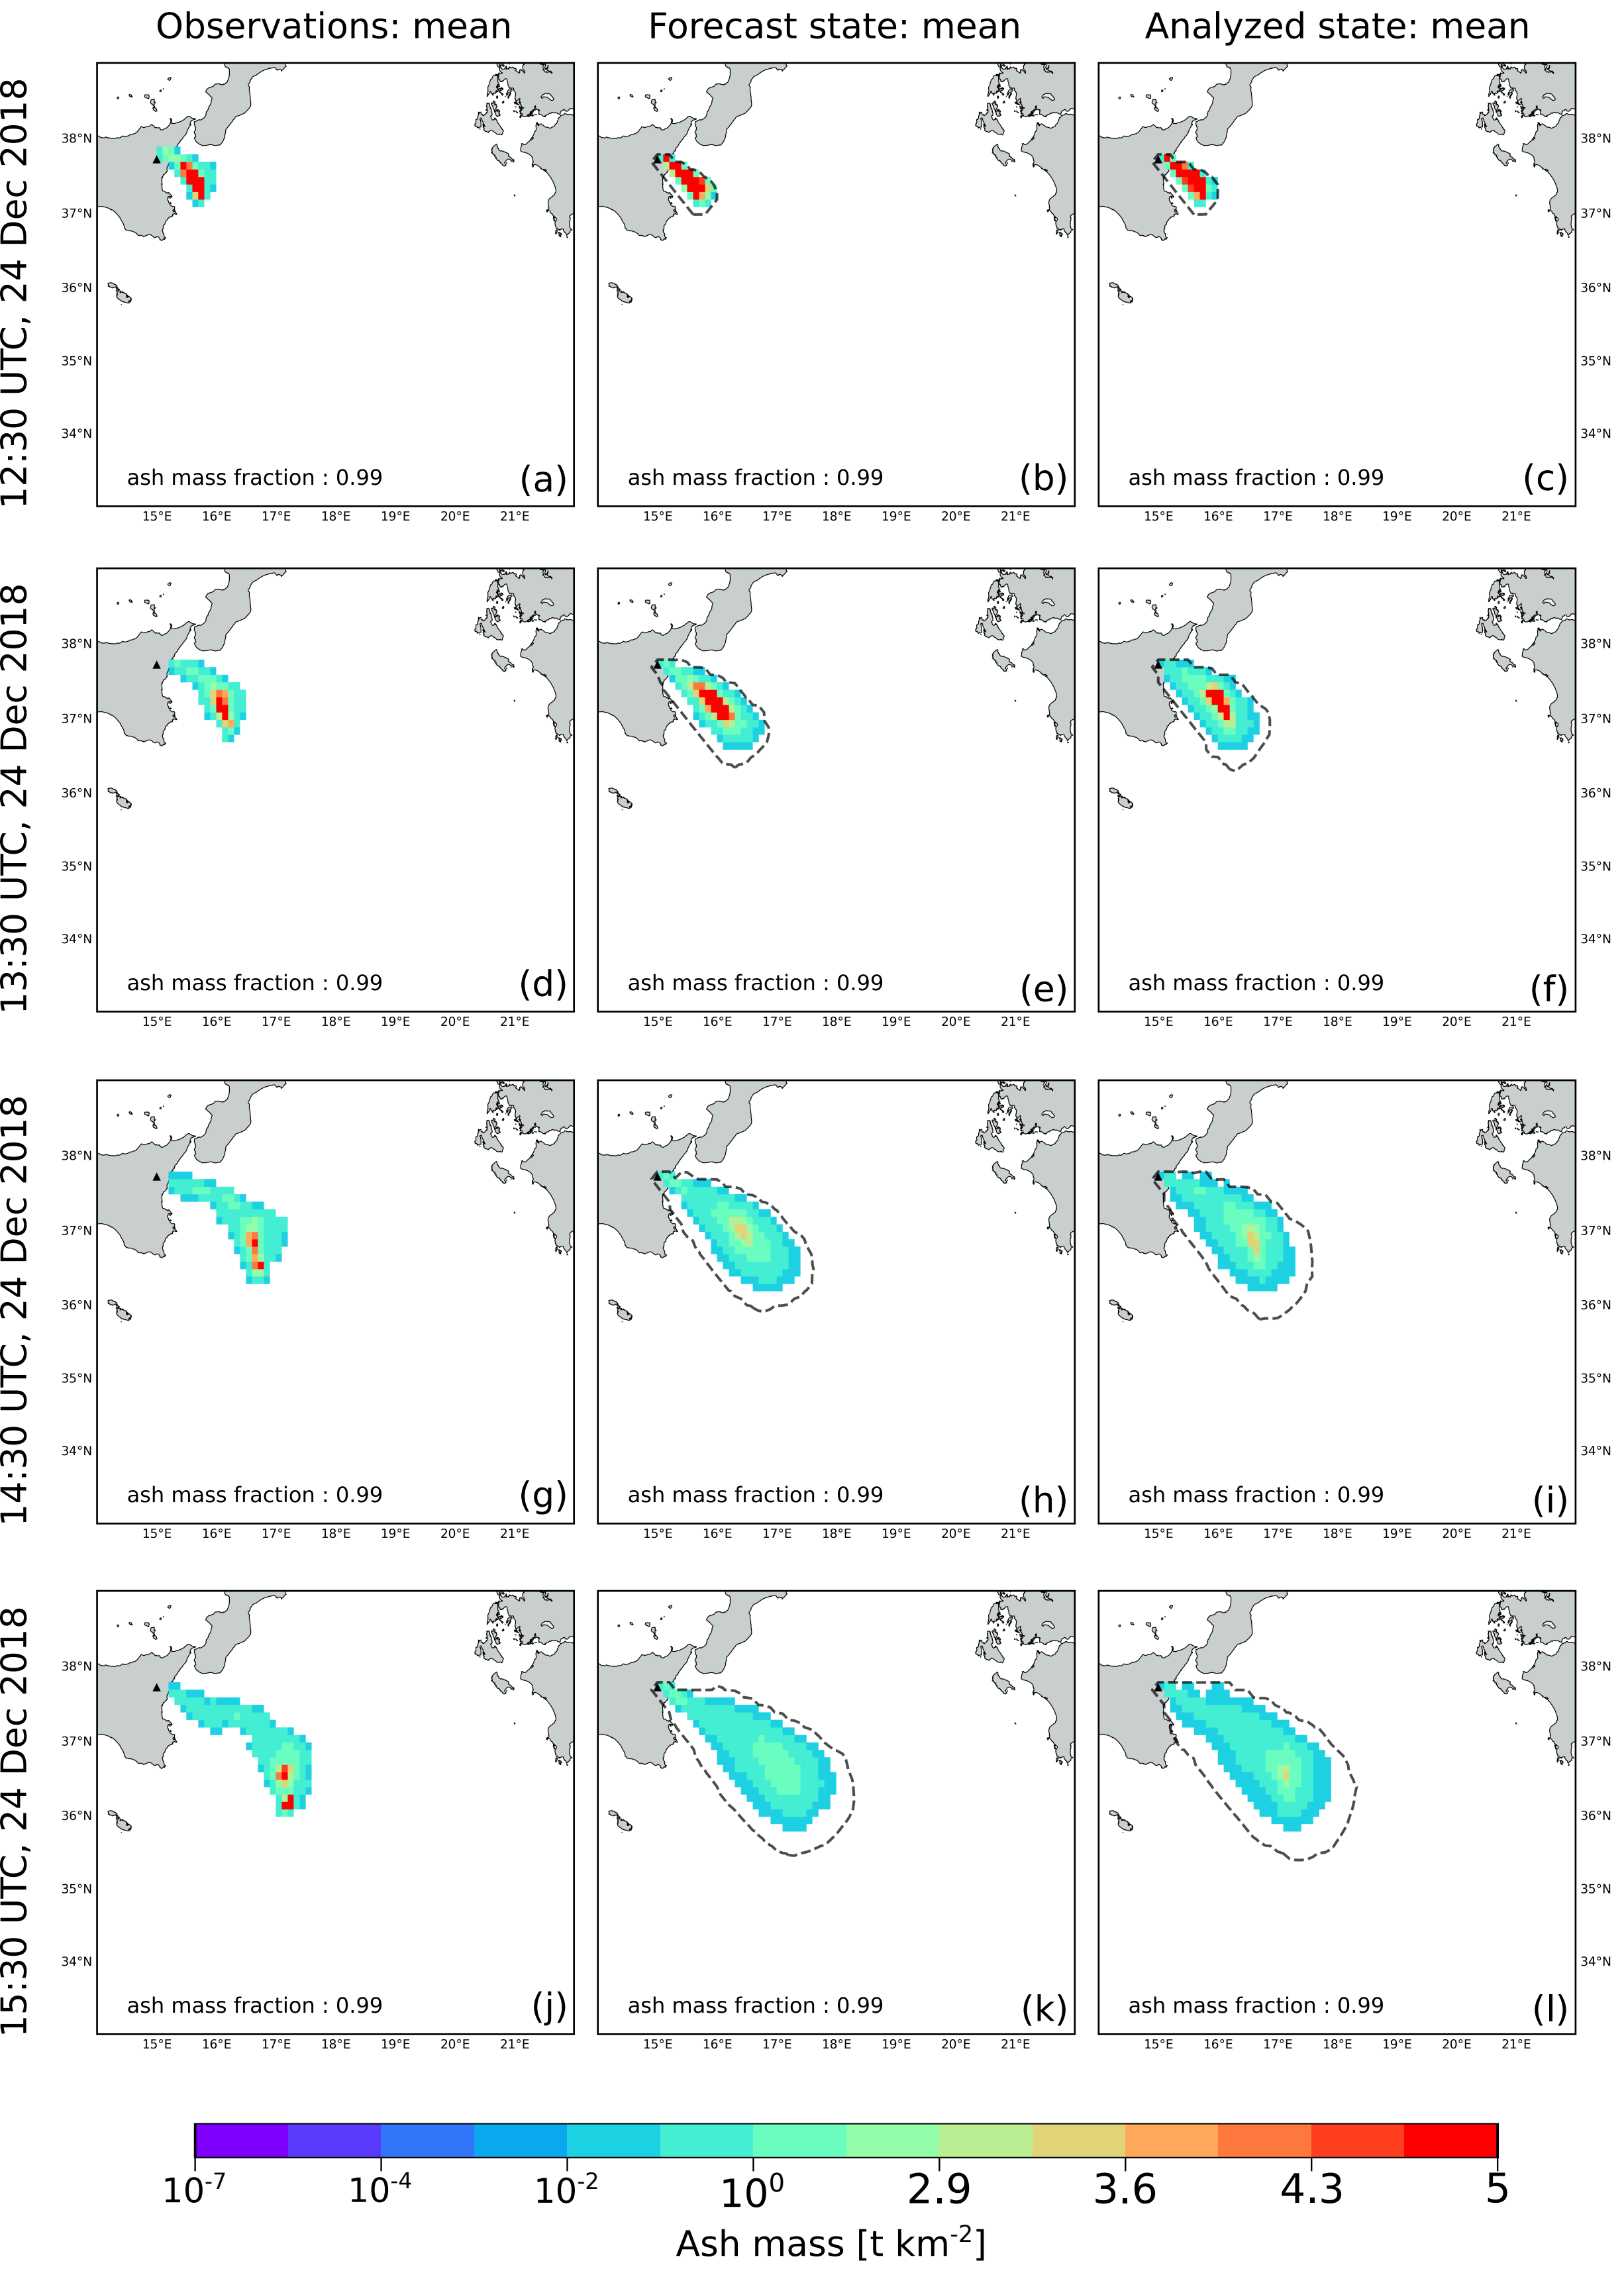

Supplement: s1 [file s1]

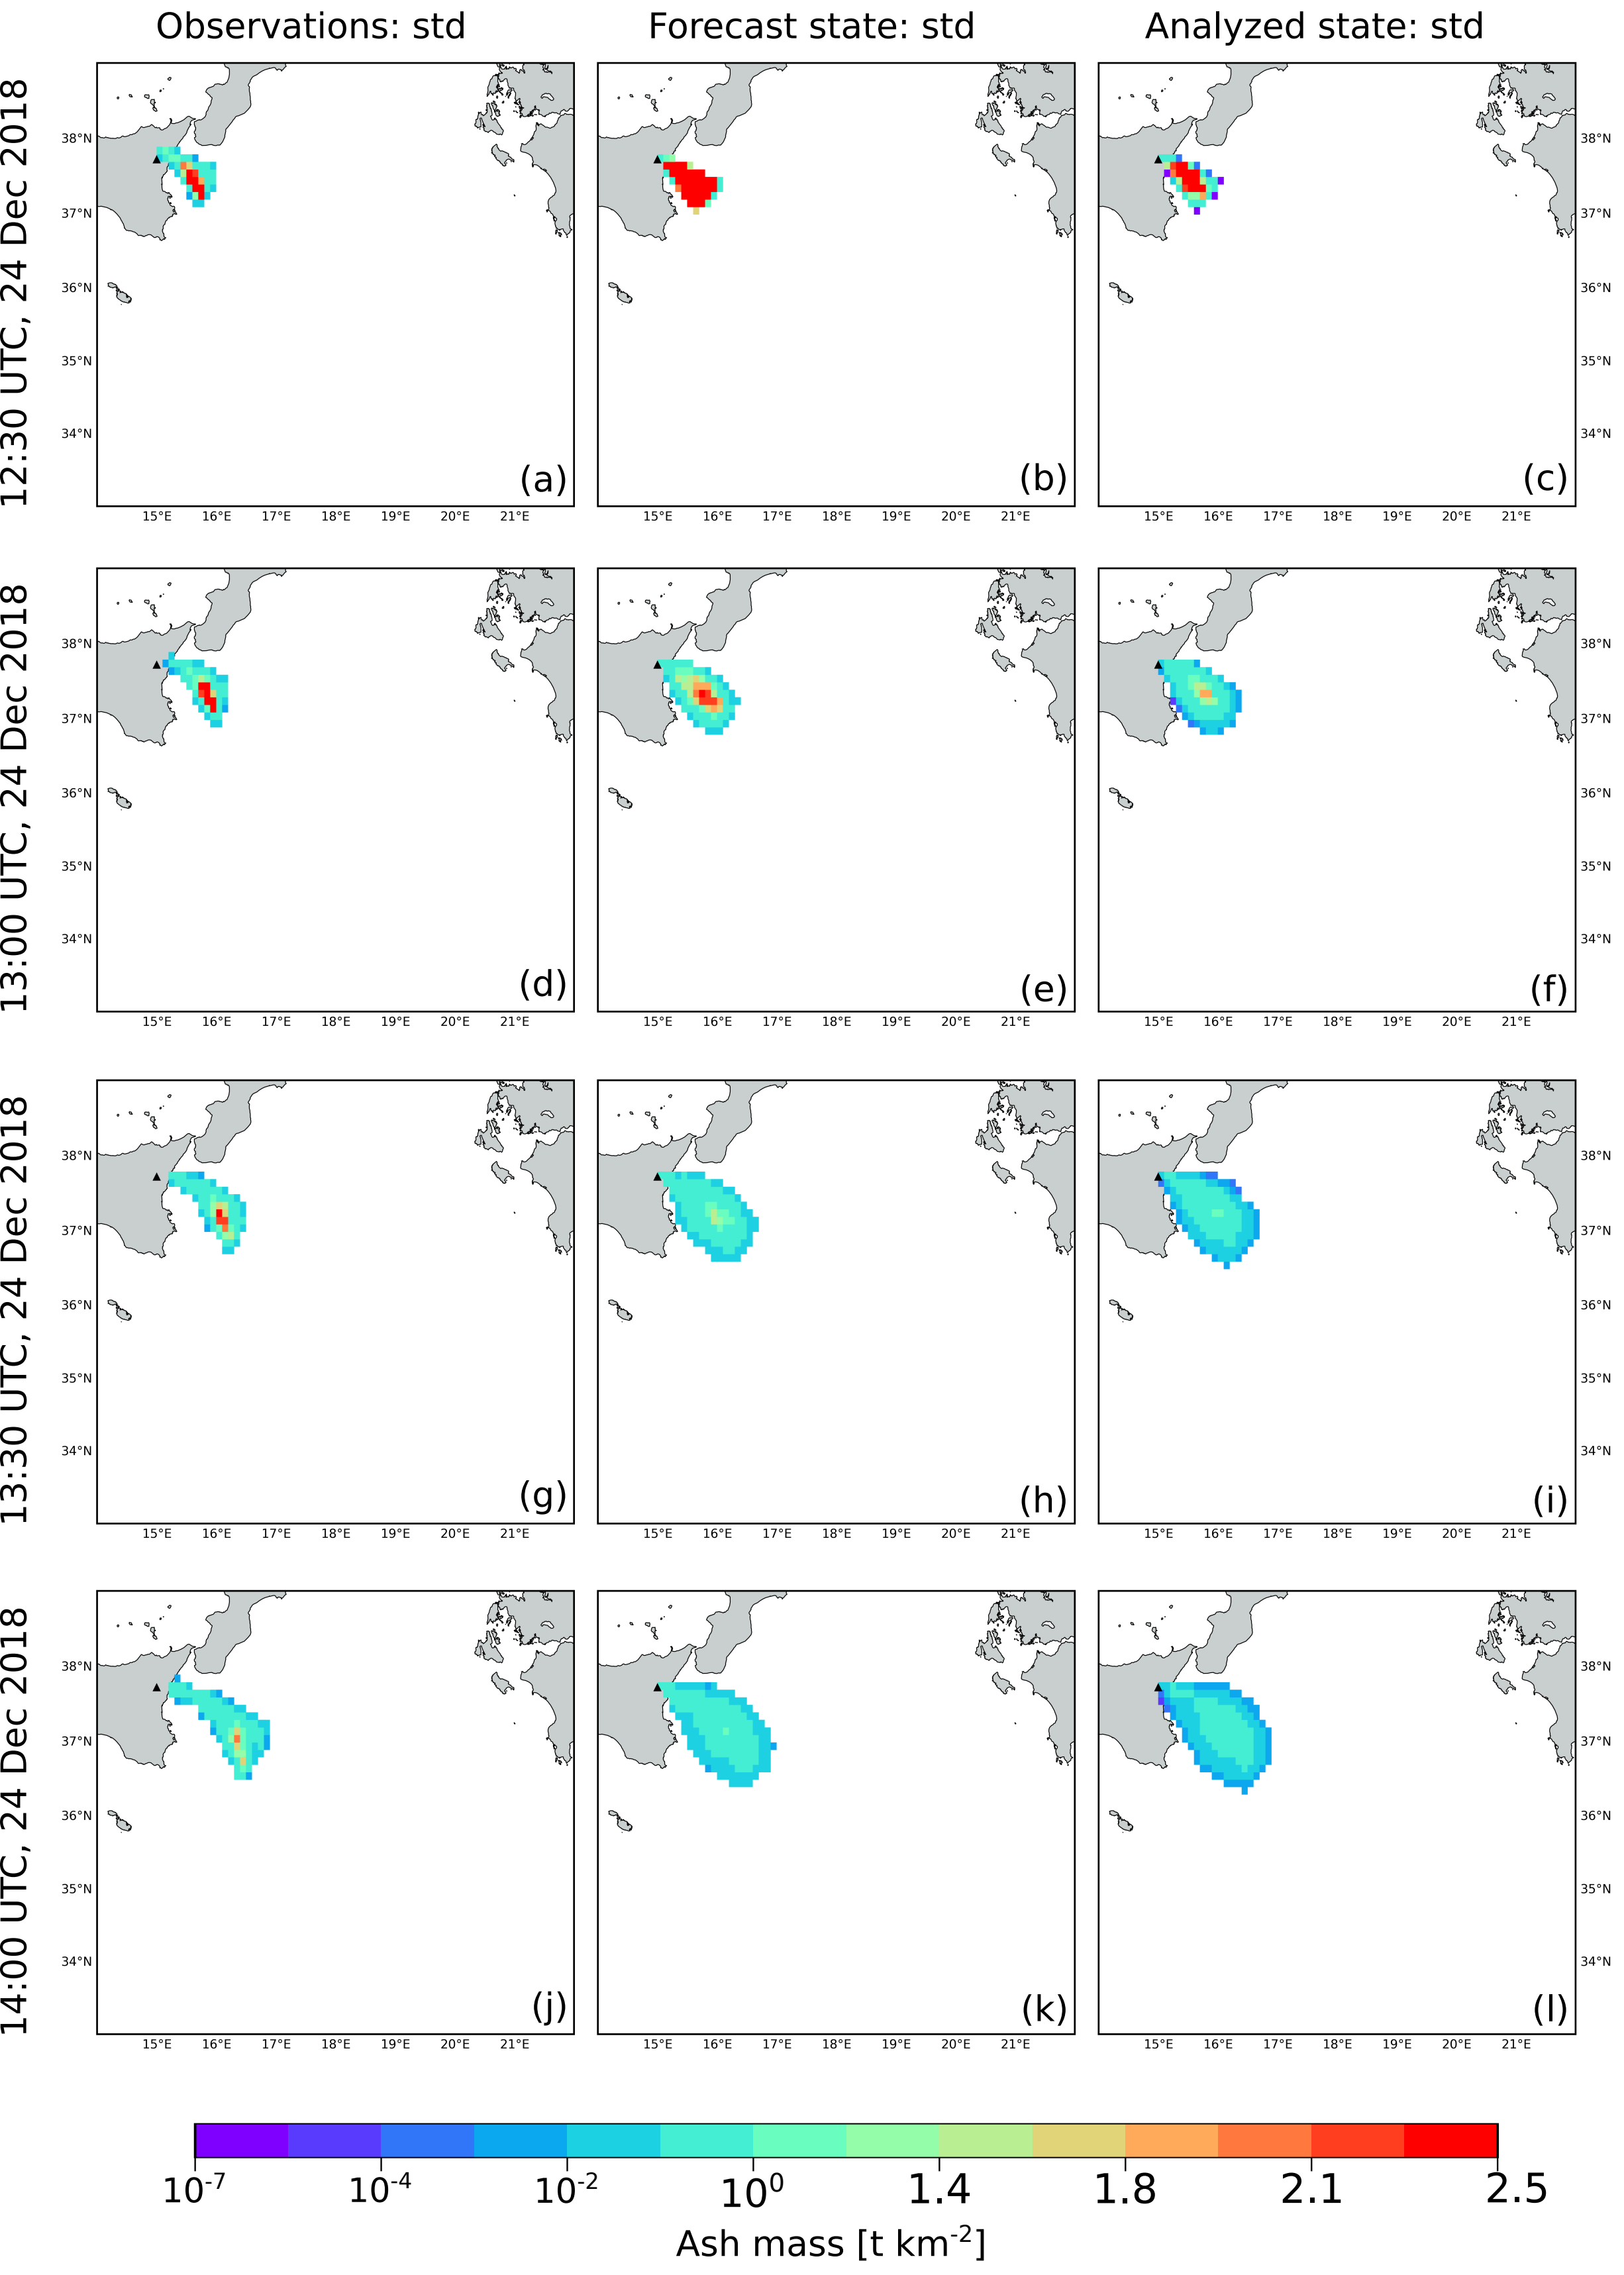

Supplement: s1 [file s1]

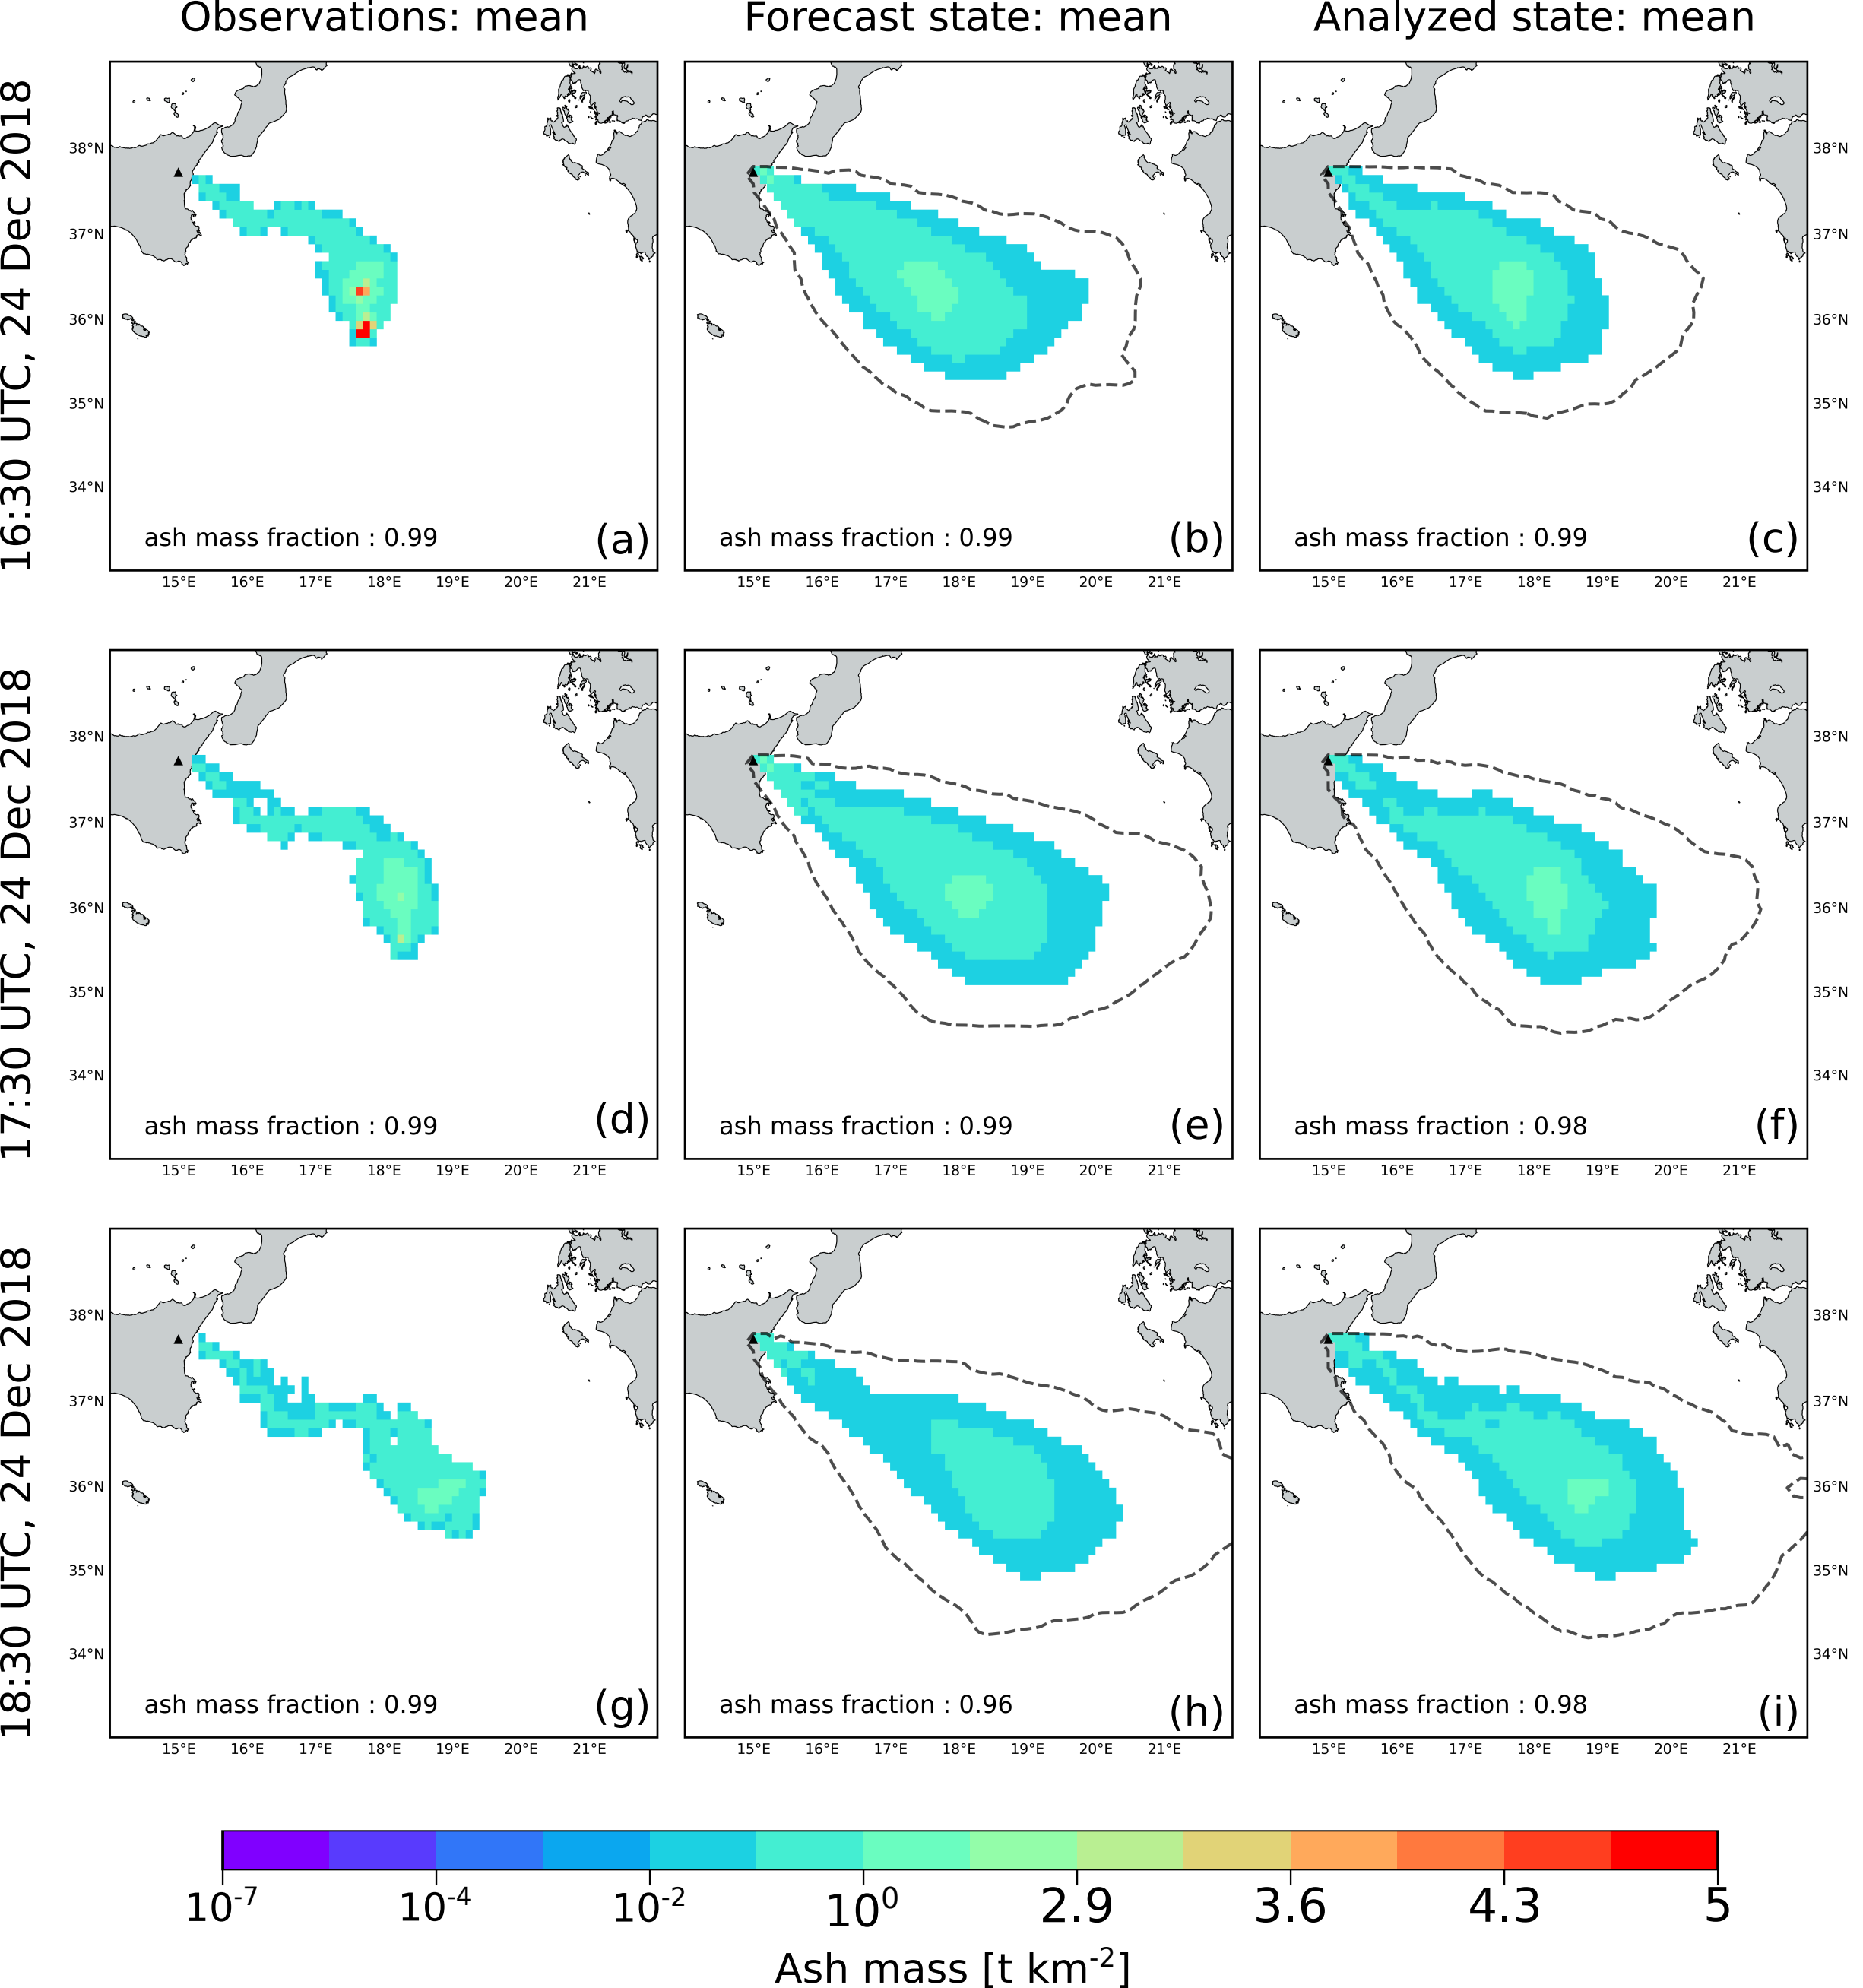

Supplement: s1 [file s1]

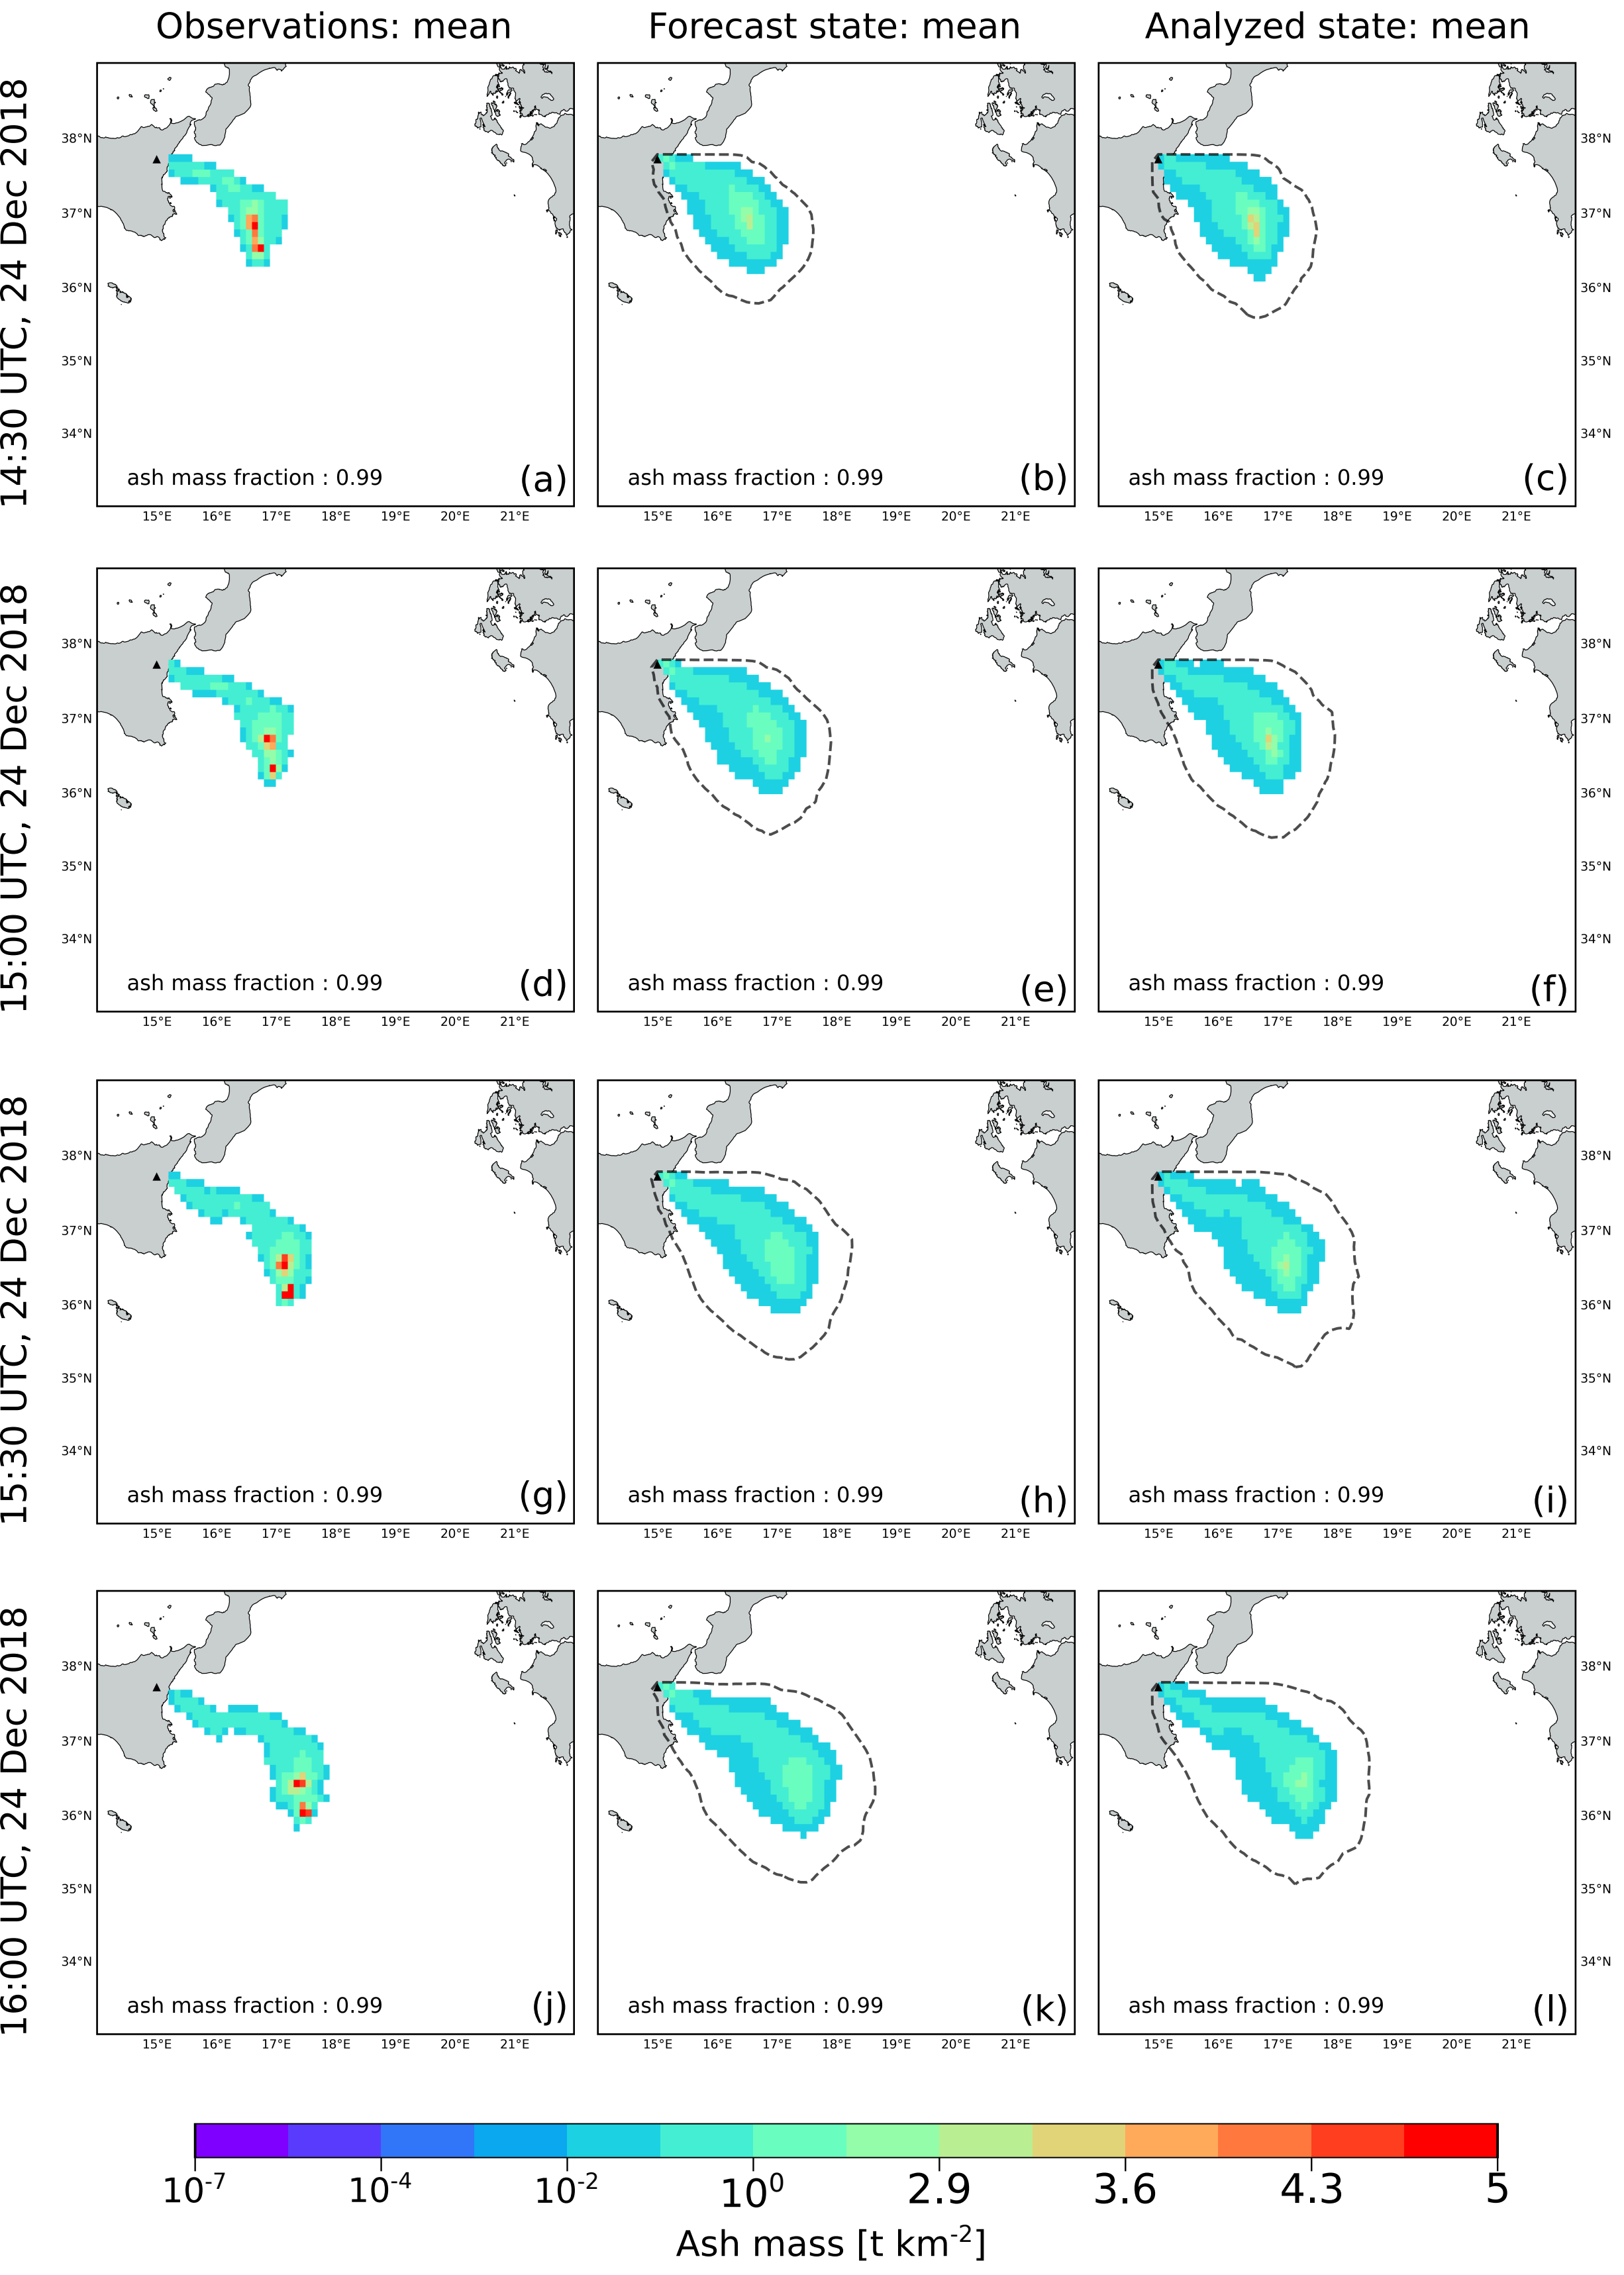

Supplement: s1 [file s1]

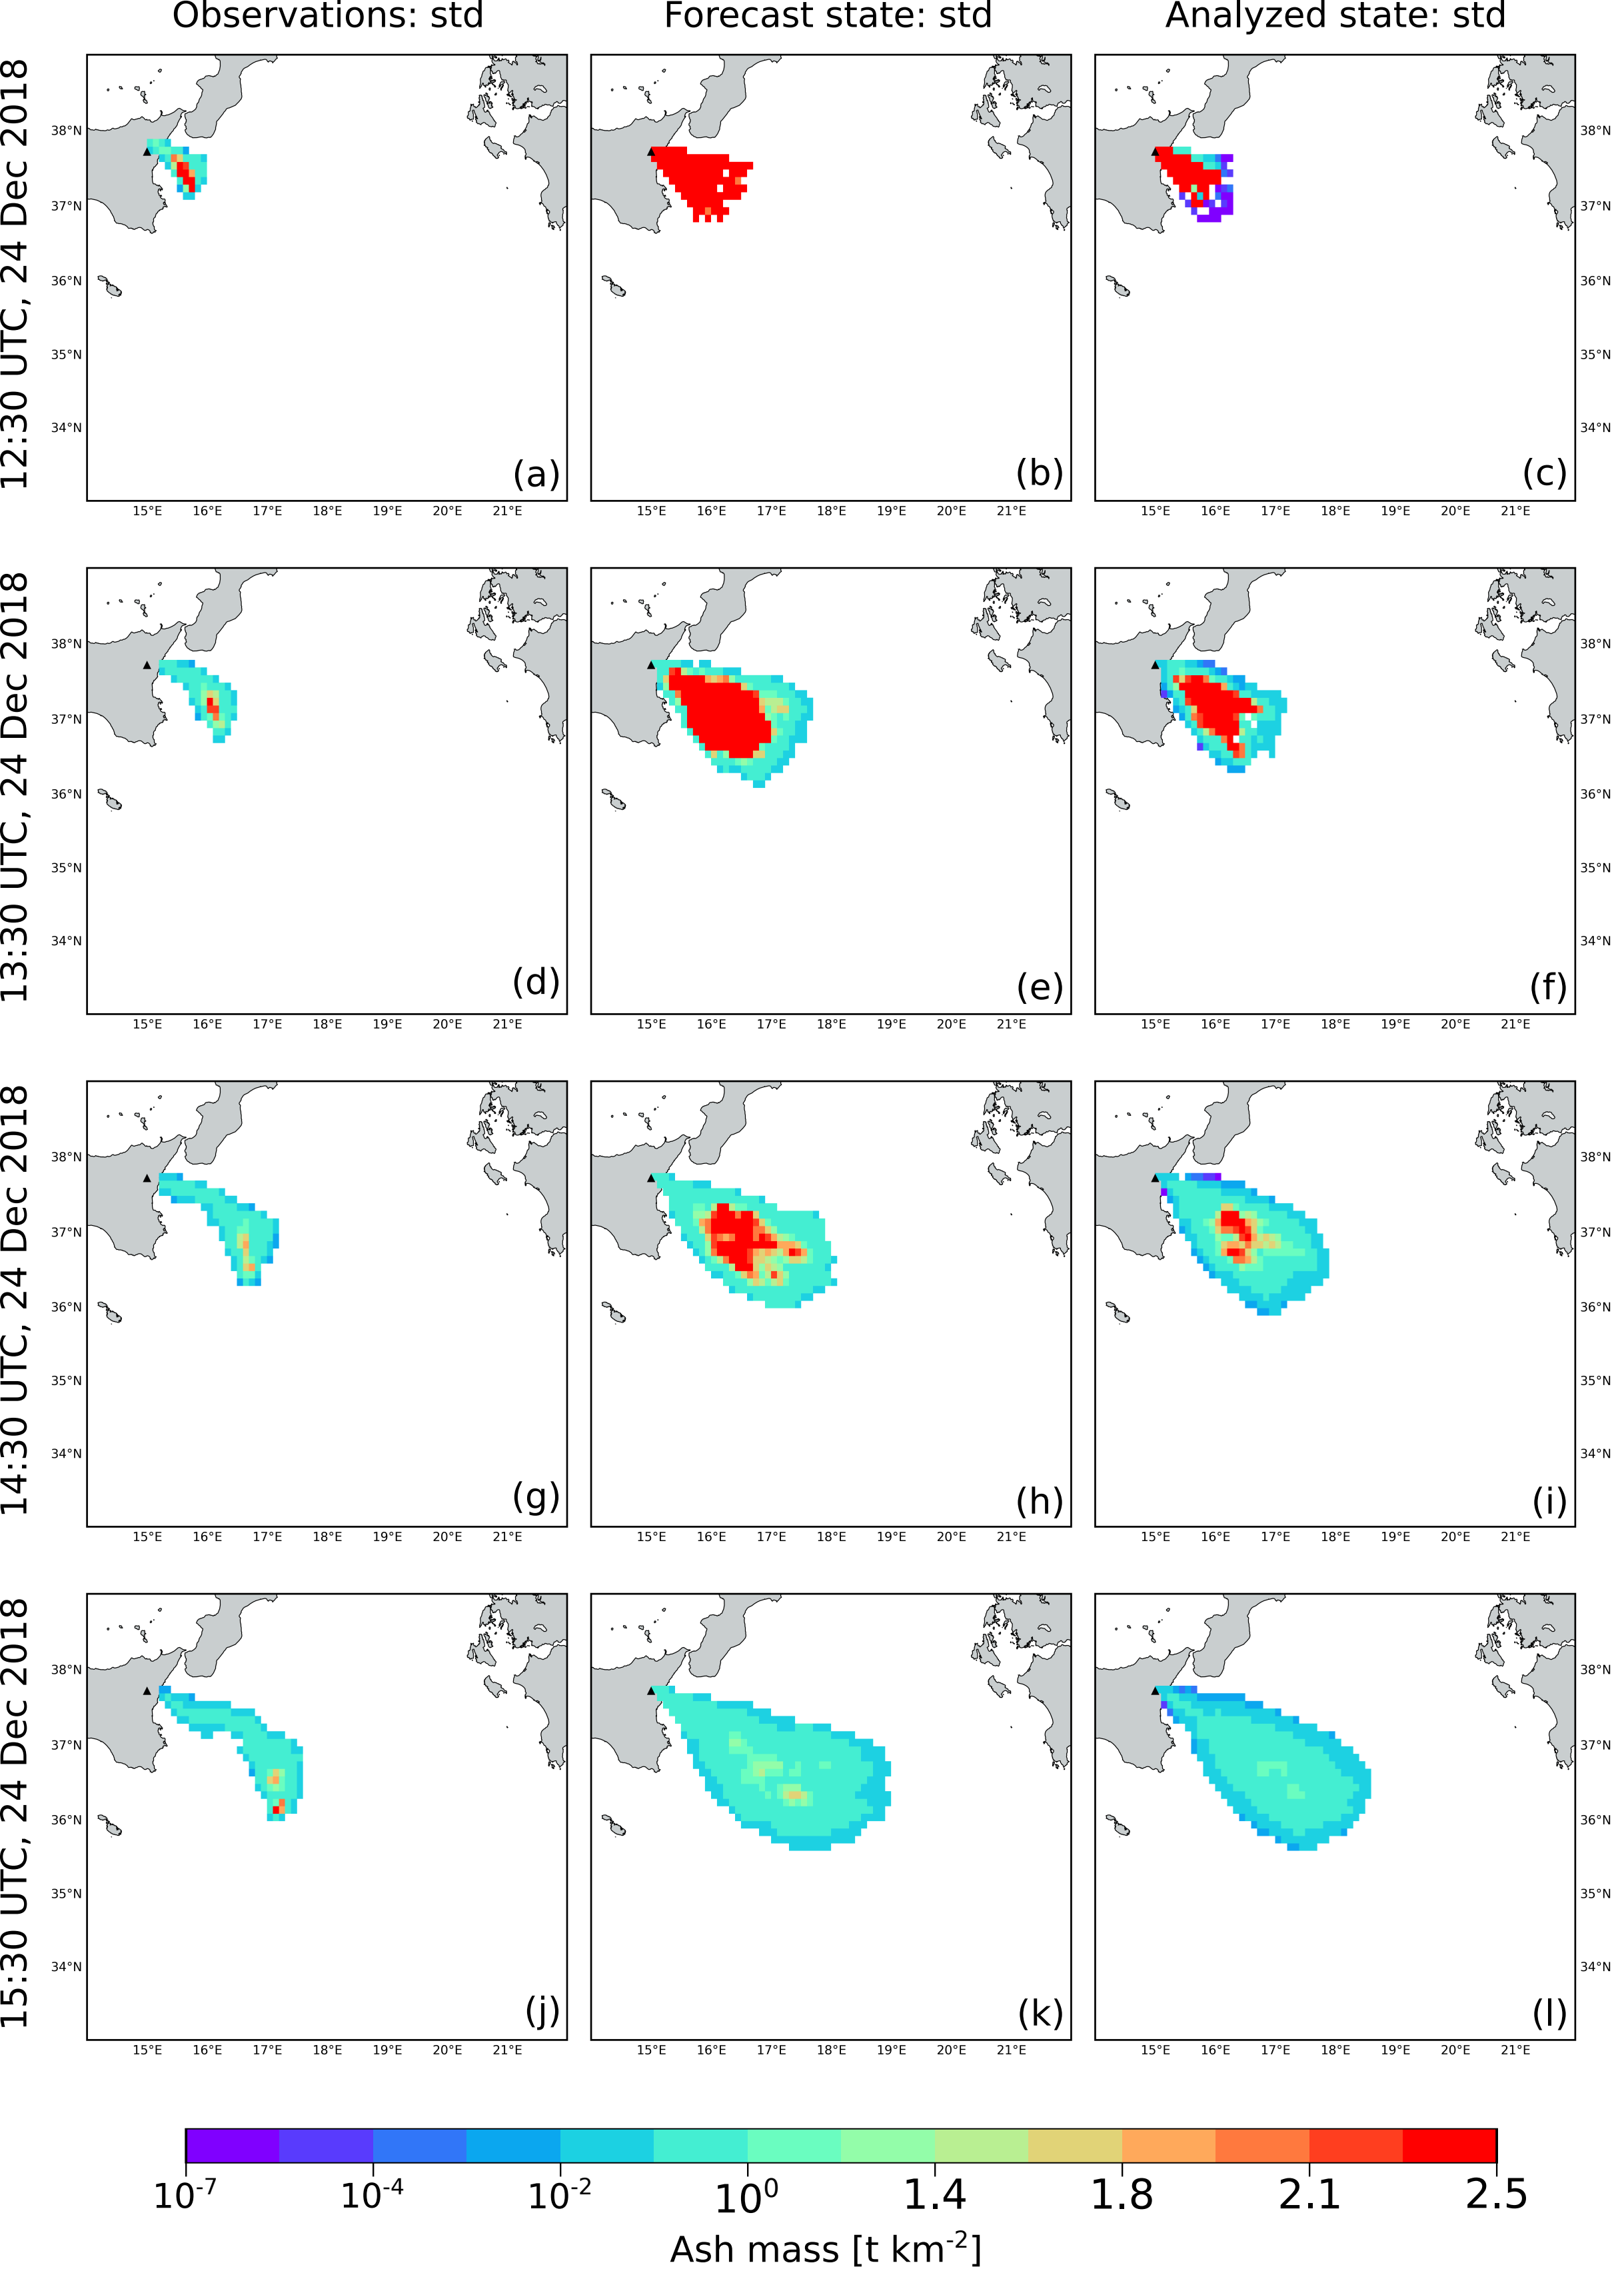

Supplement: s1 [file s1]

Observations: std

Forecast state: std

Analyzed state: std

16:30 UTC, 24 Dec 2018

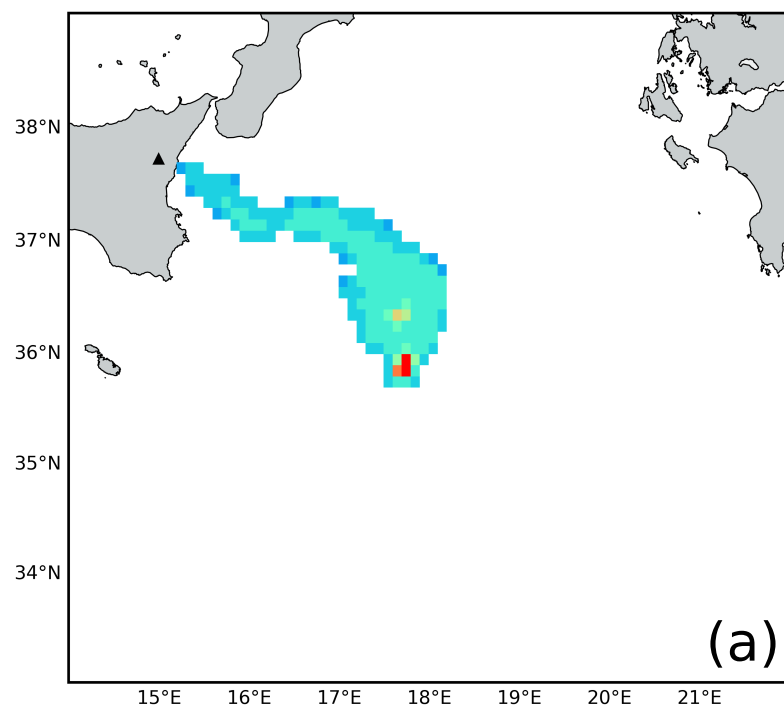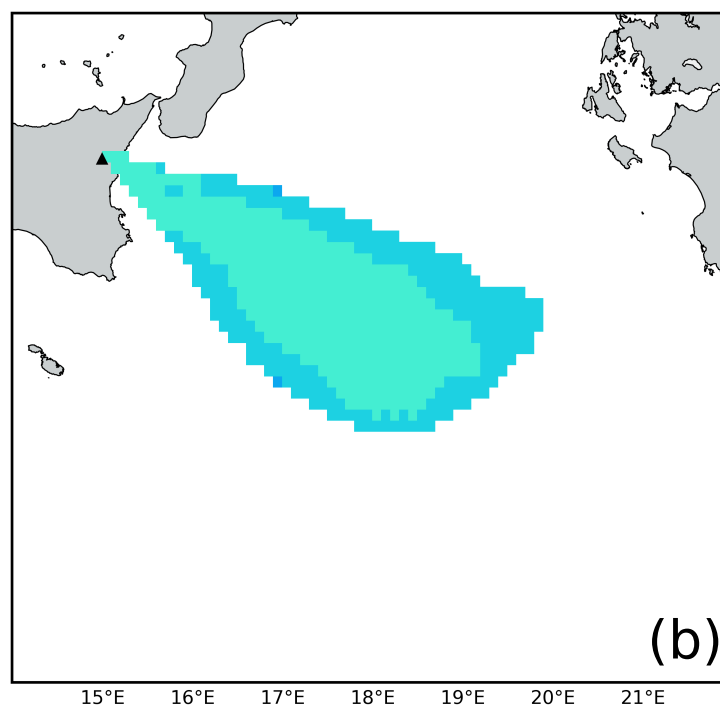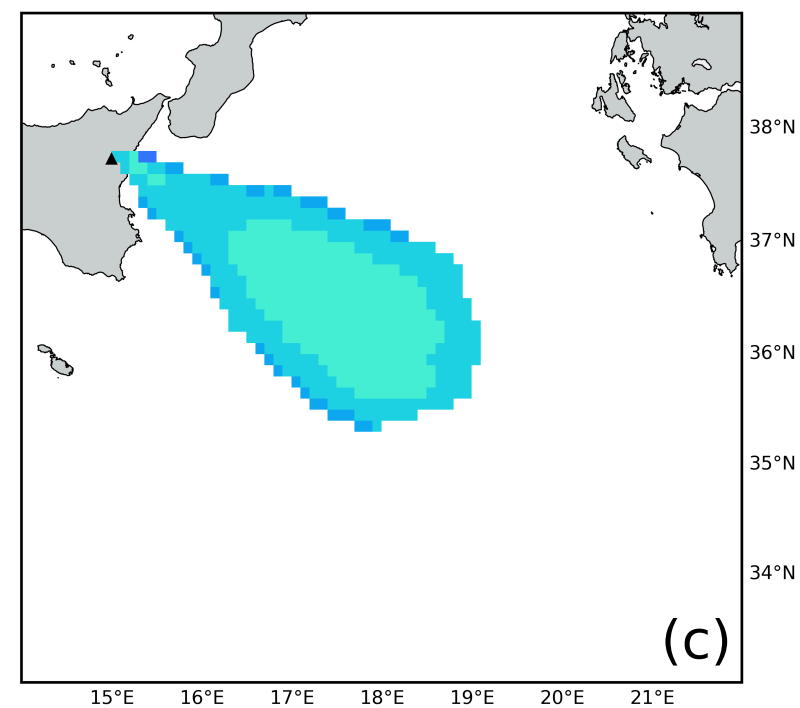

17:30 UTC, 24 Dec 2018

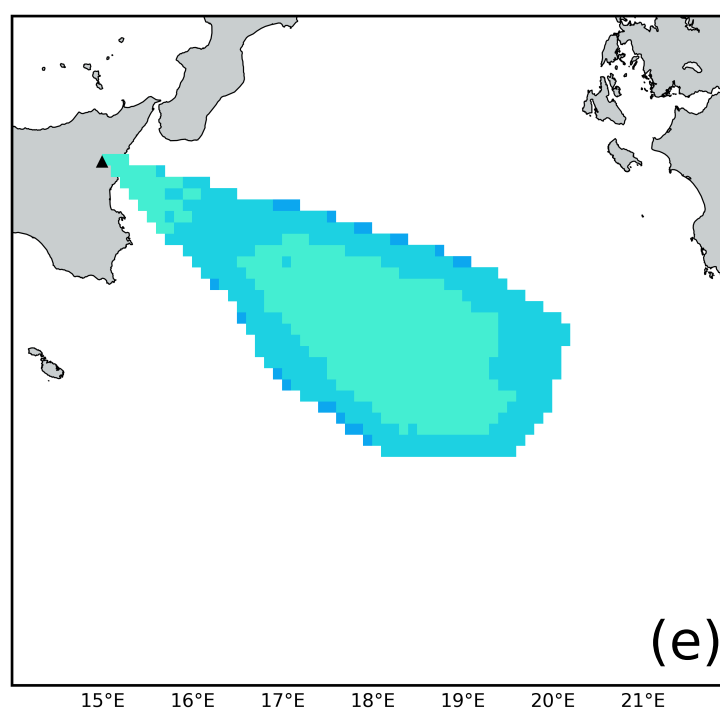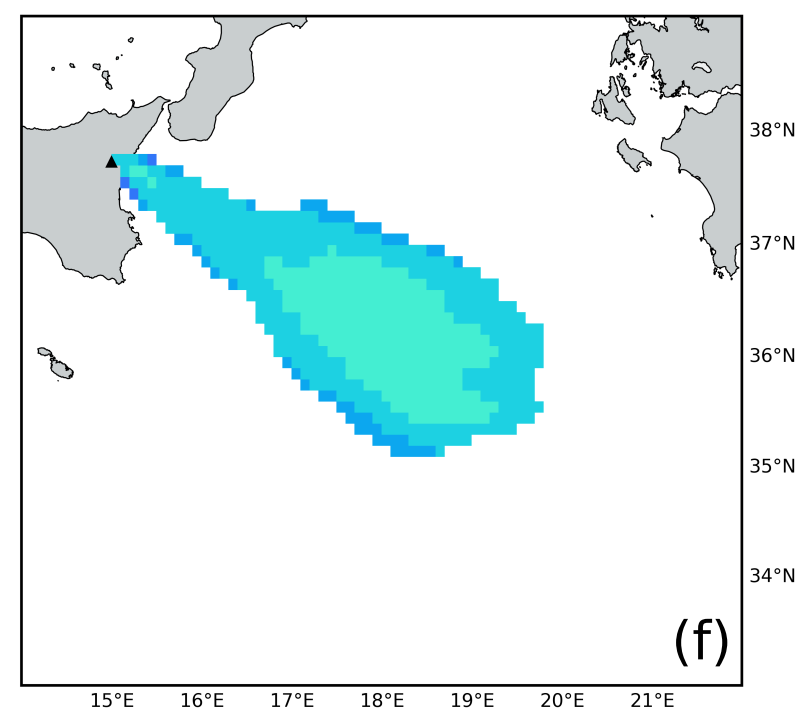

18:30 UTC, 24 Dec 2018

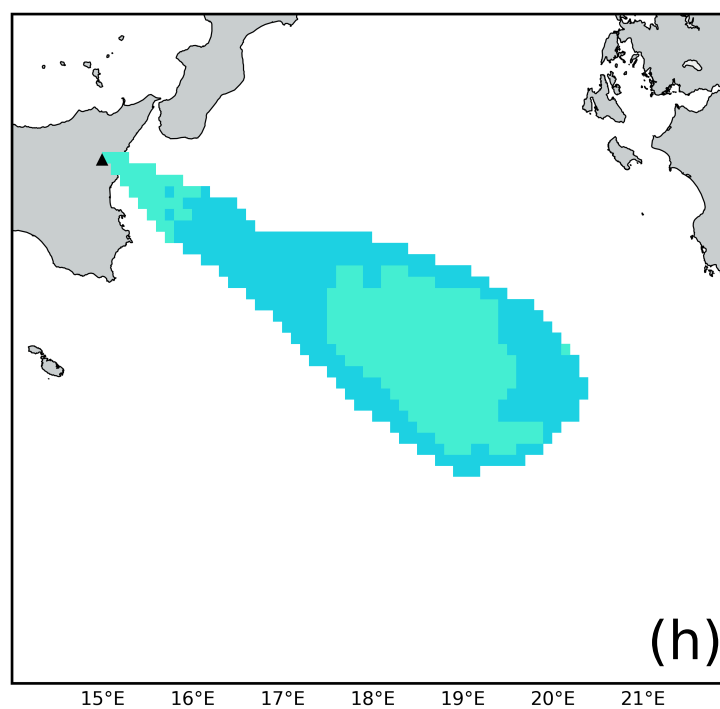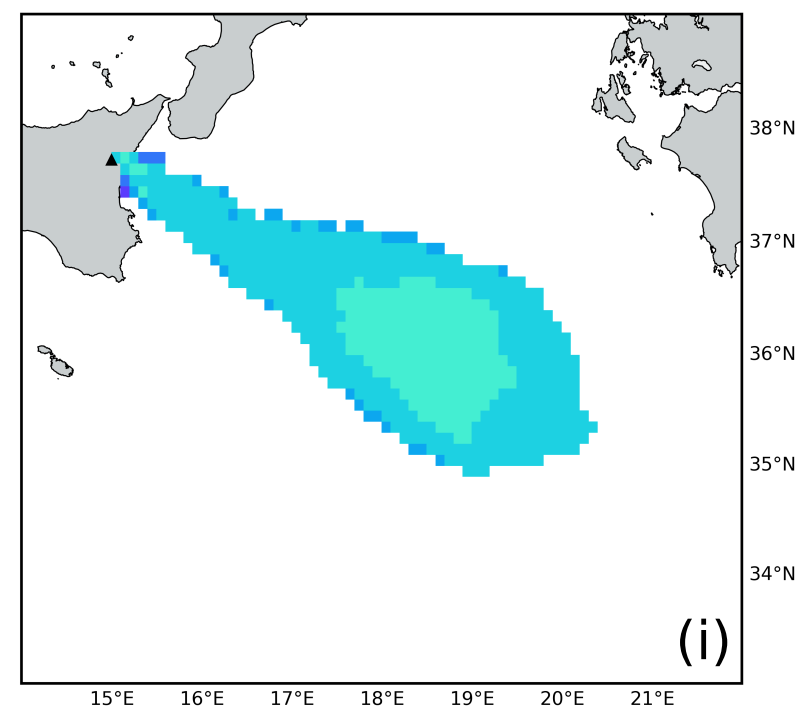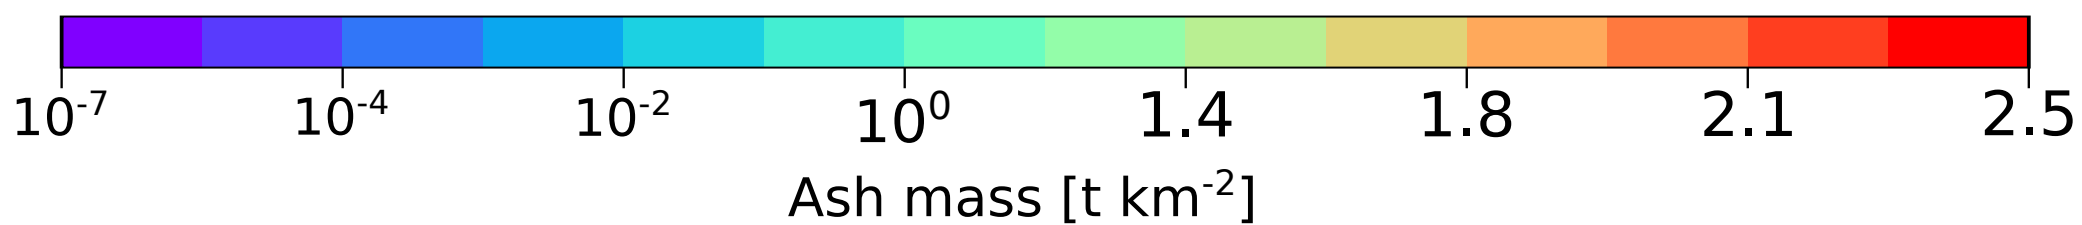

Supplement: s1 [file s1]

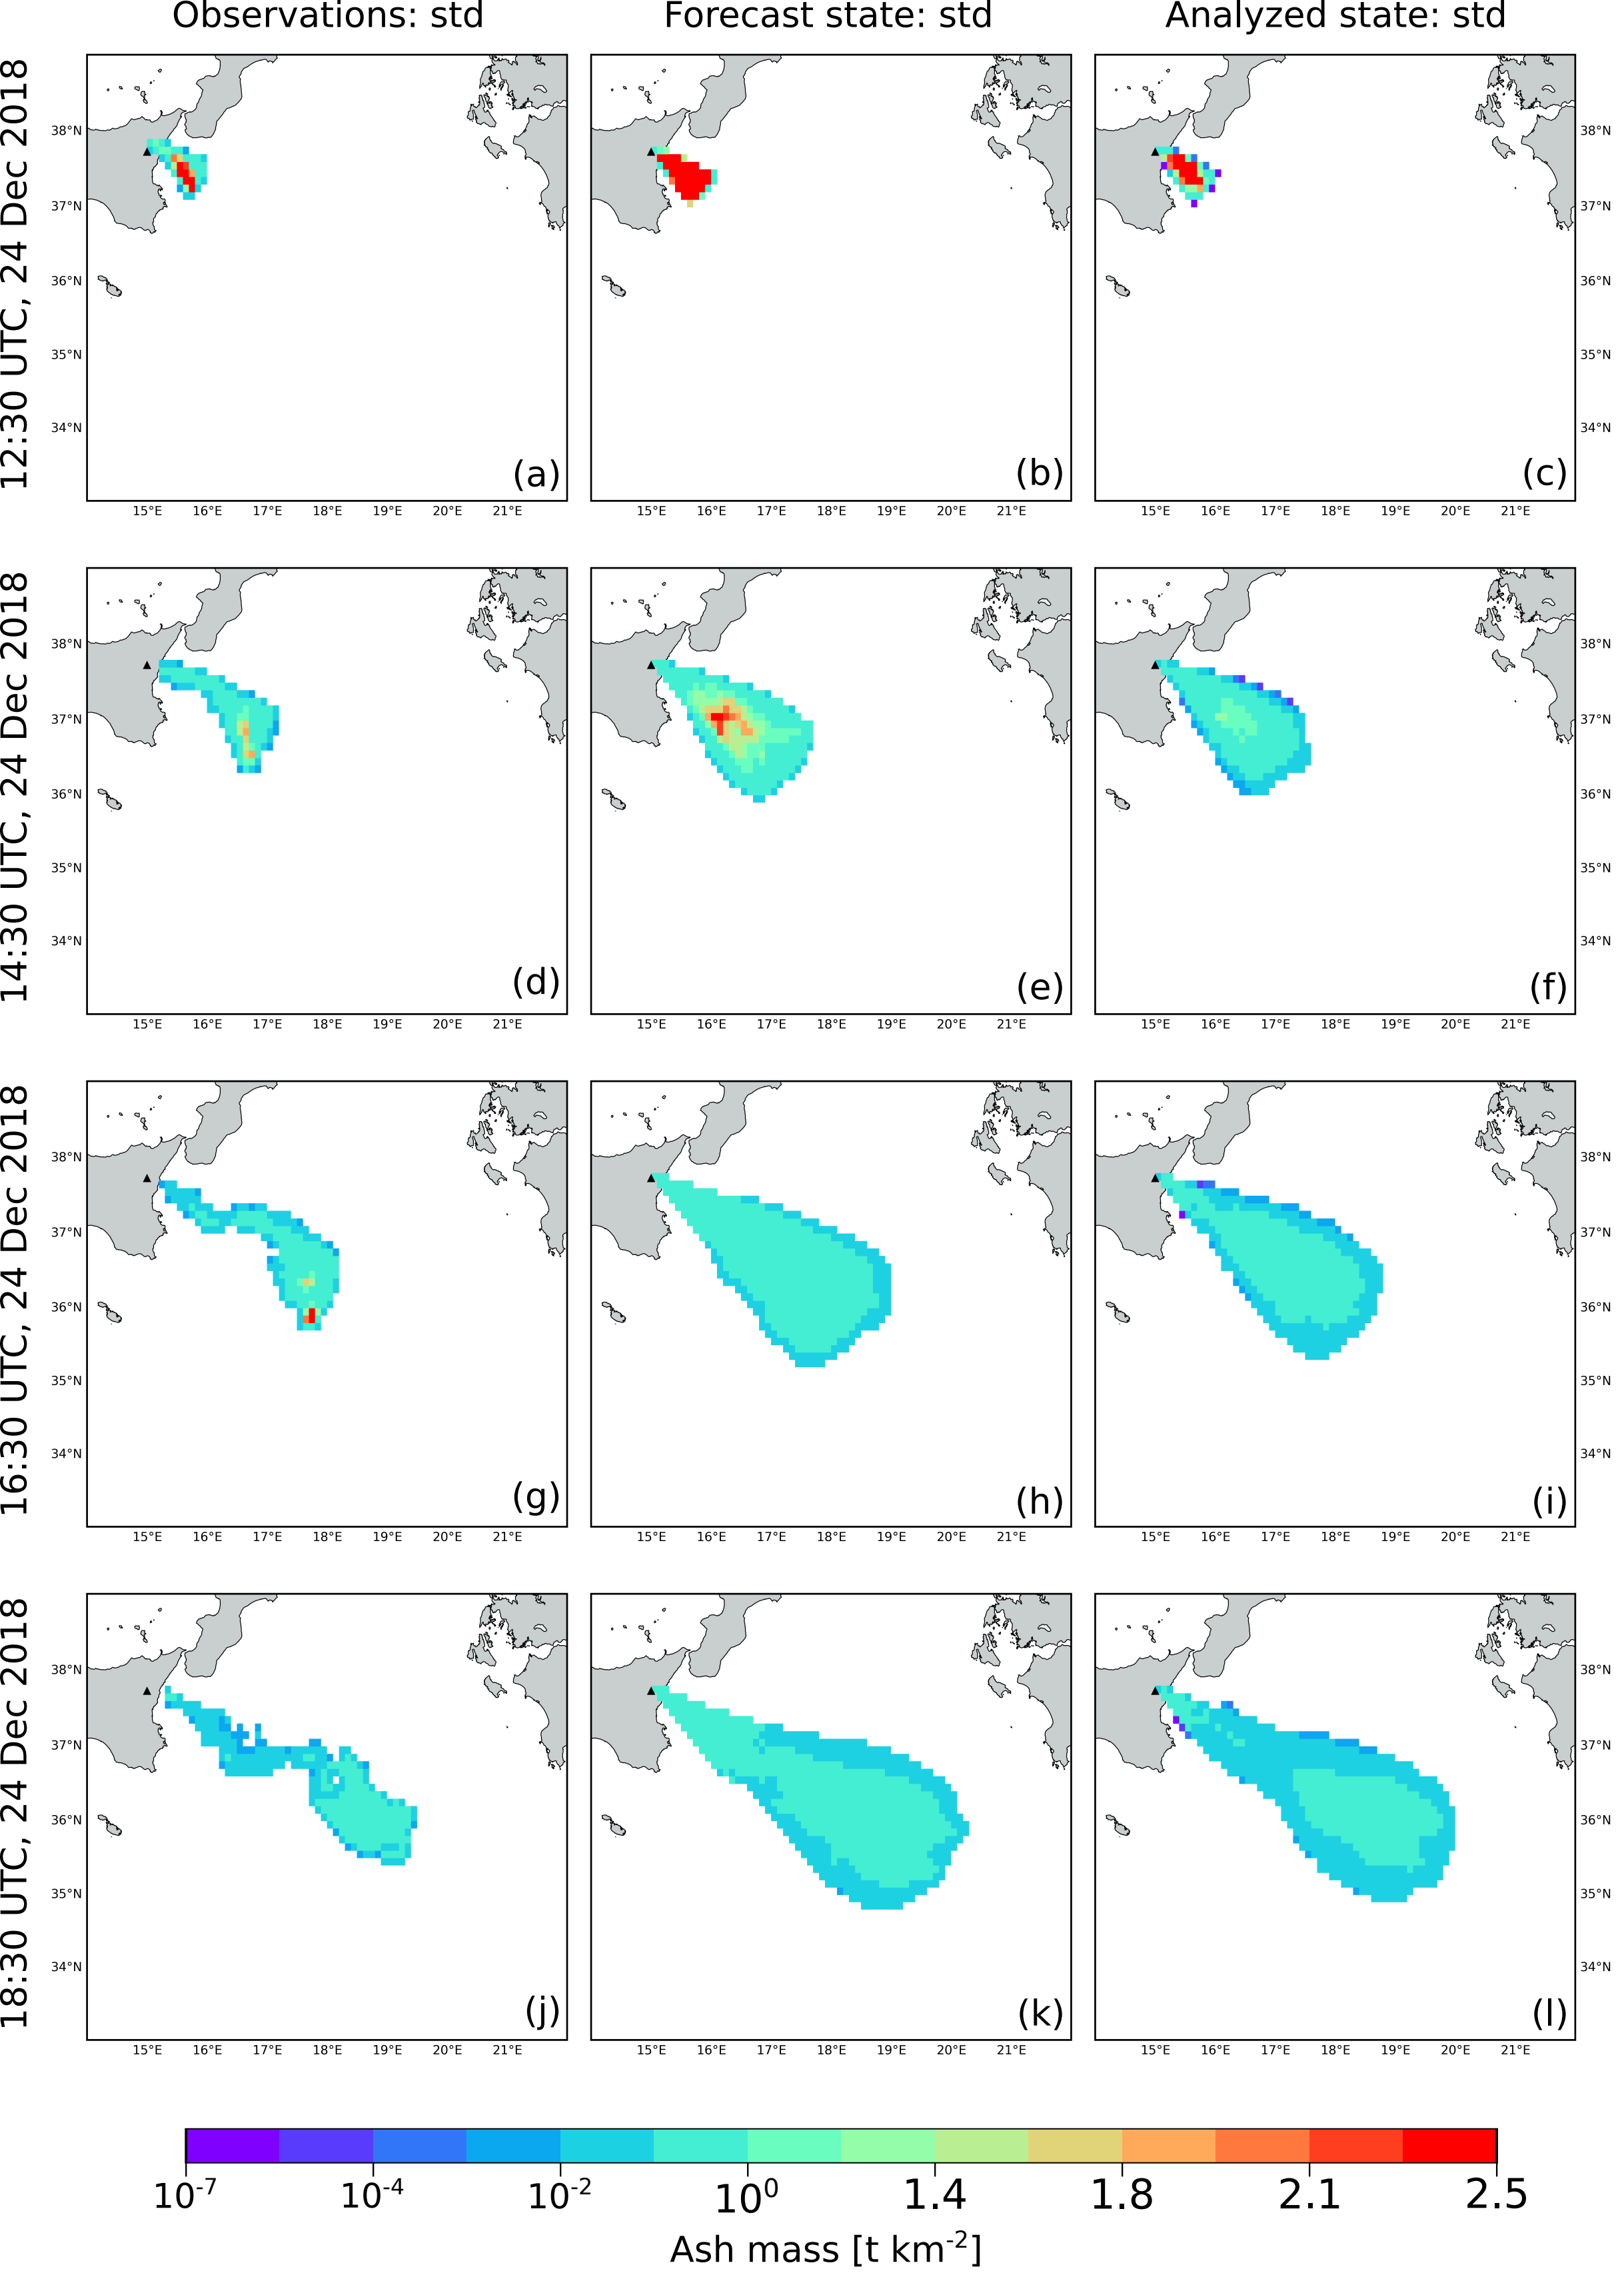

Supplement: s1 [file s1]

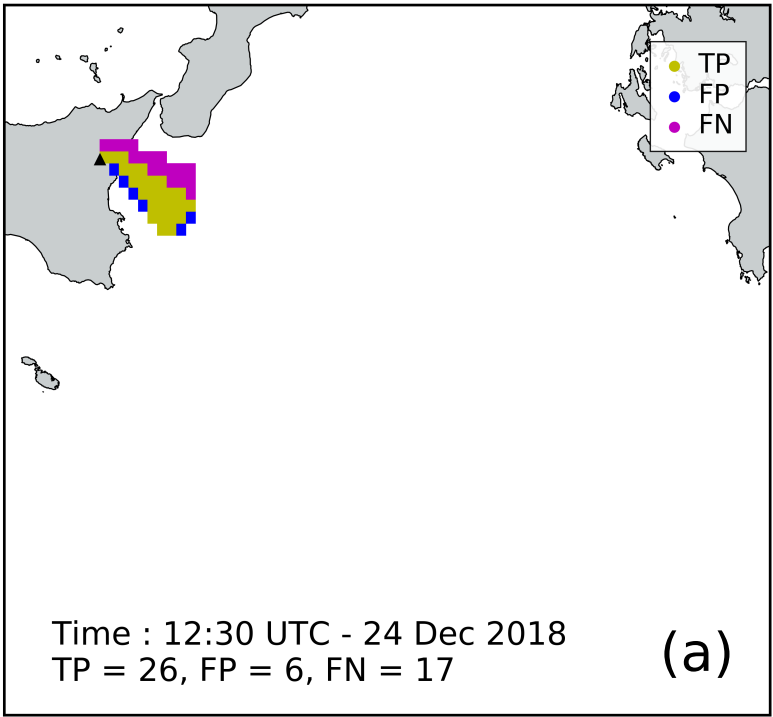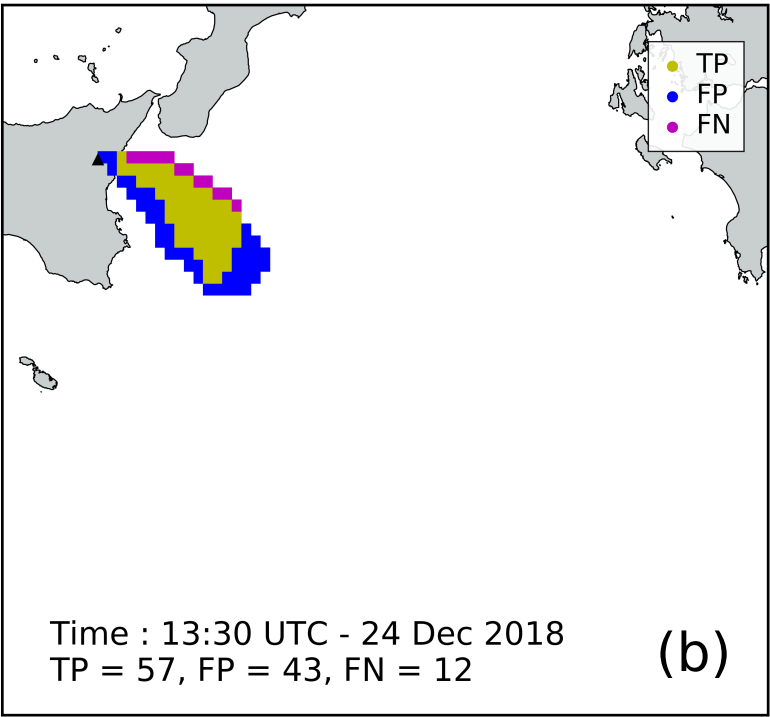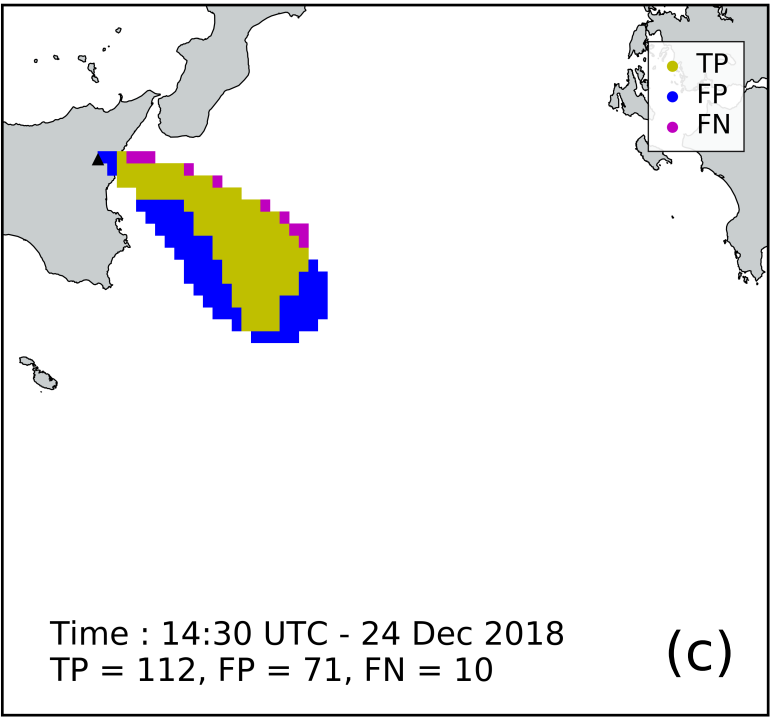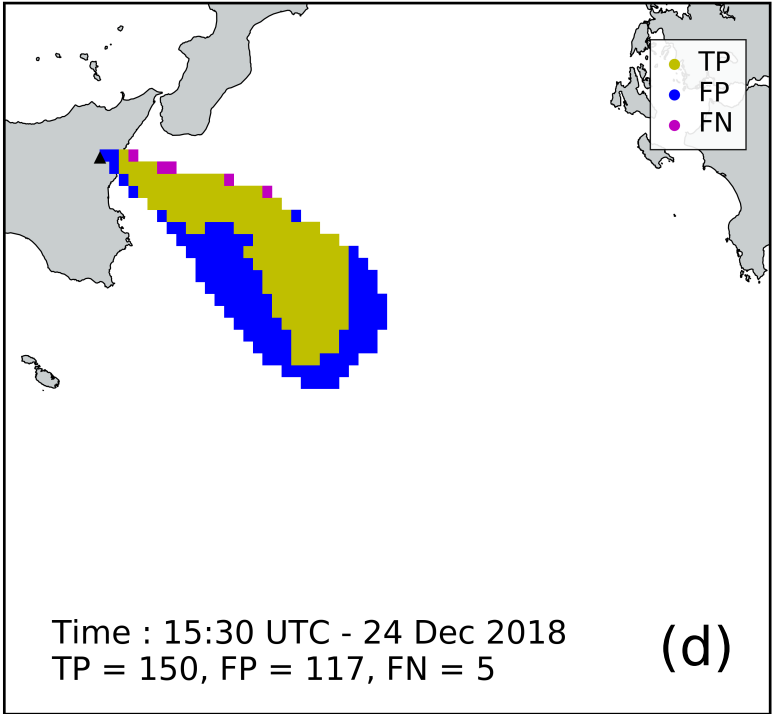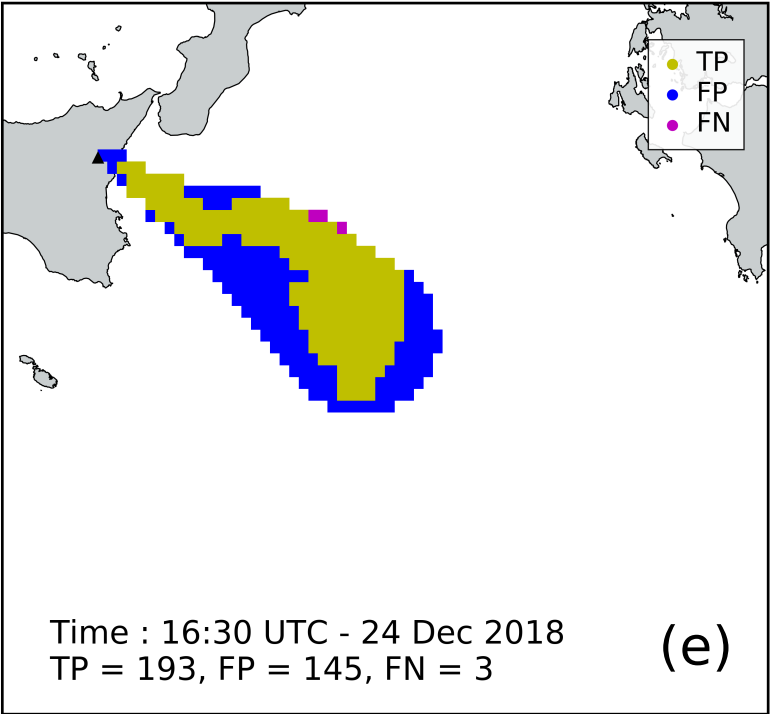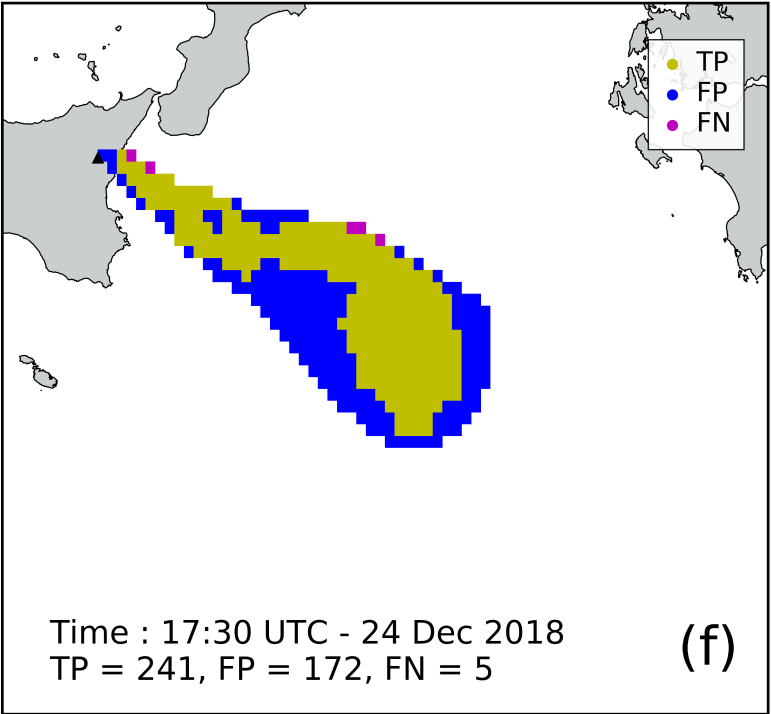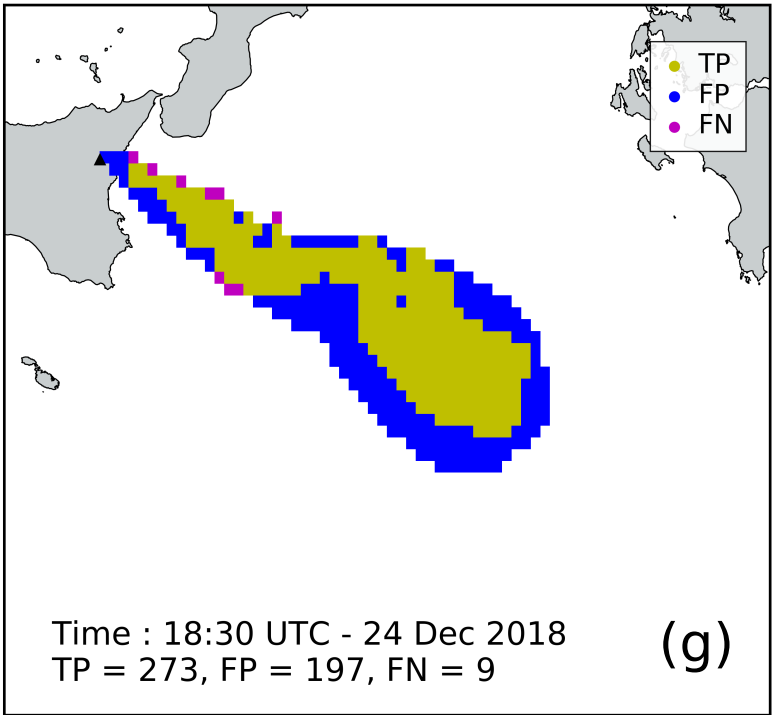

Supplement: s1 [file s1]

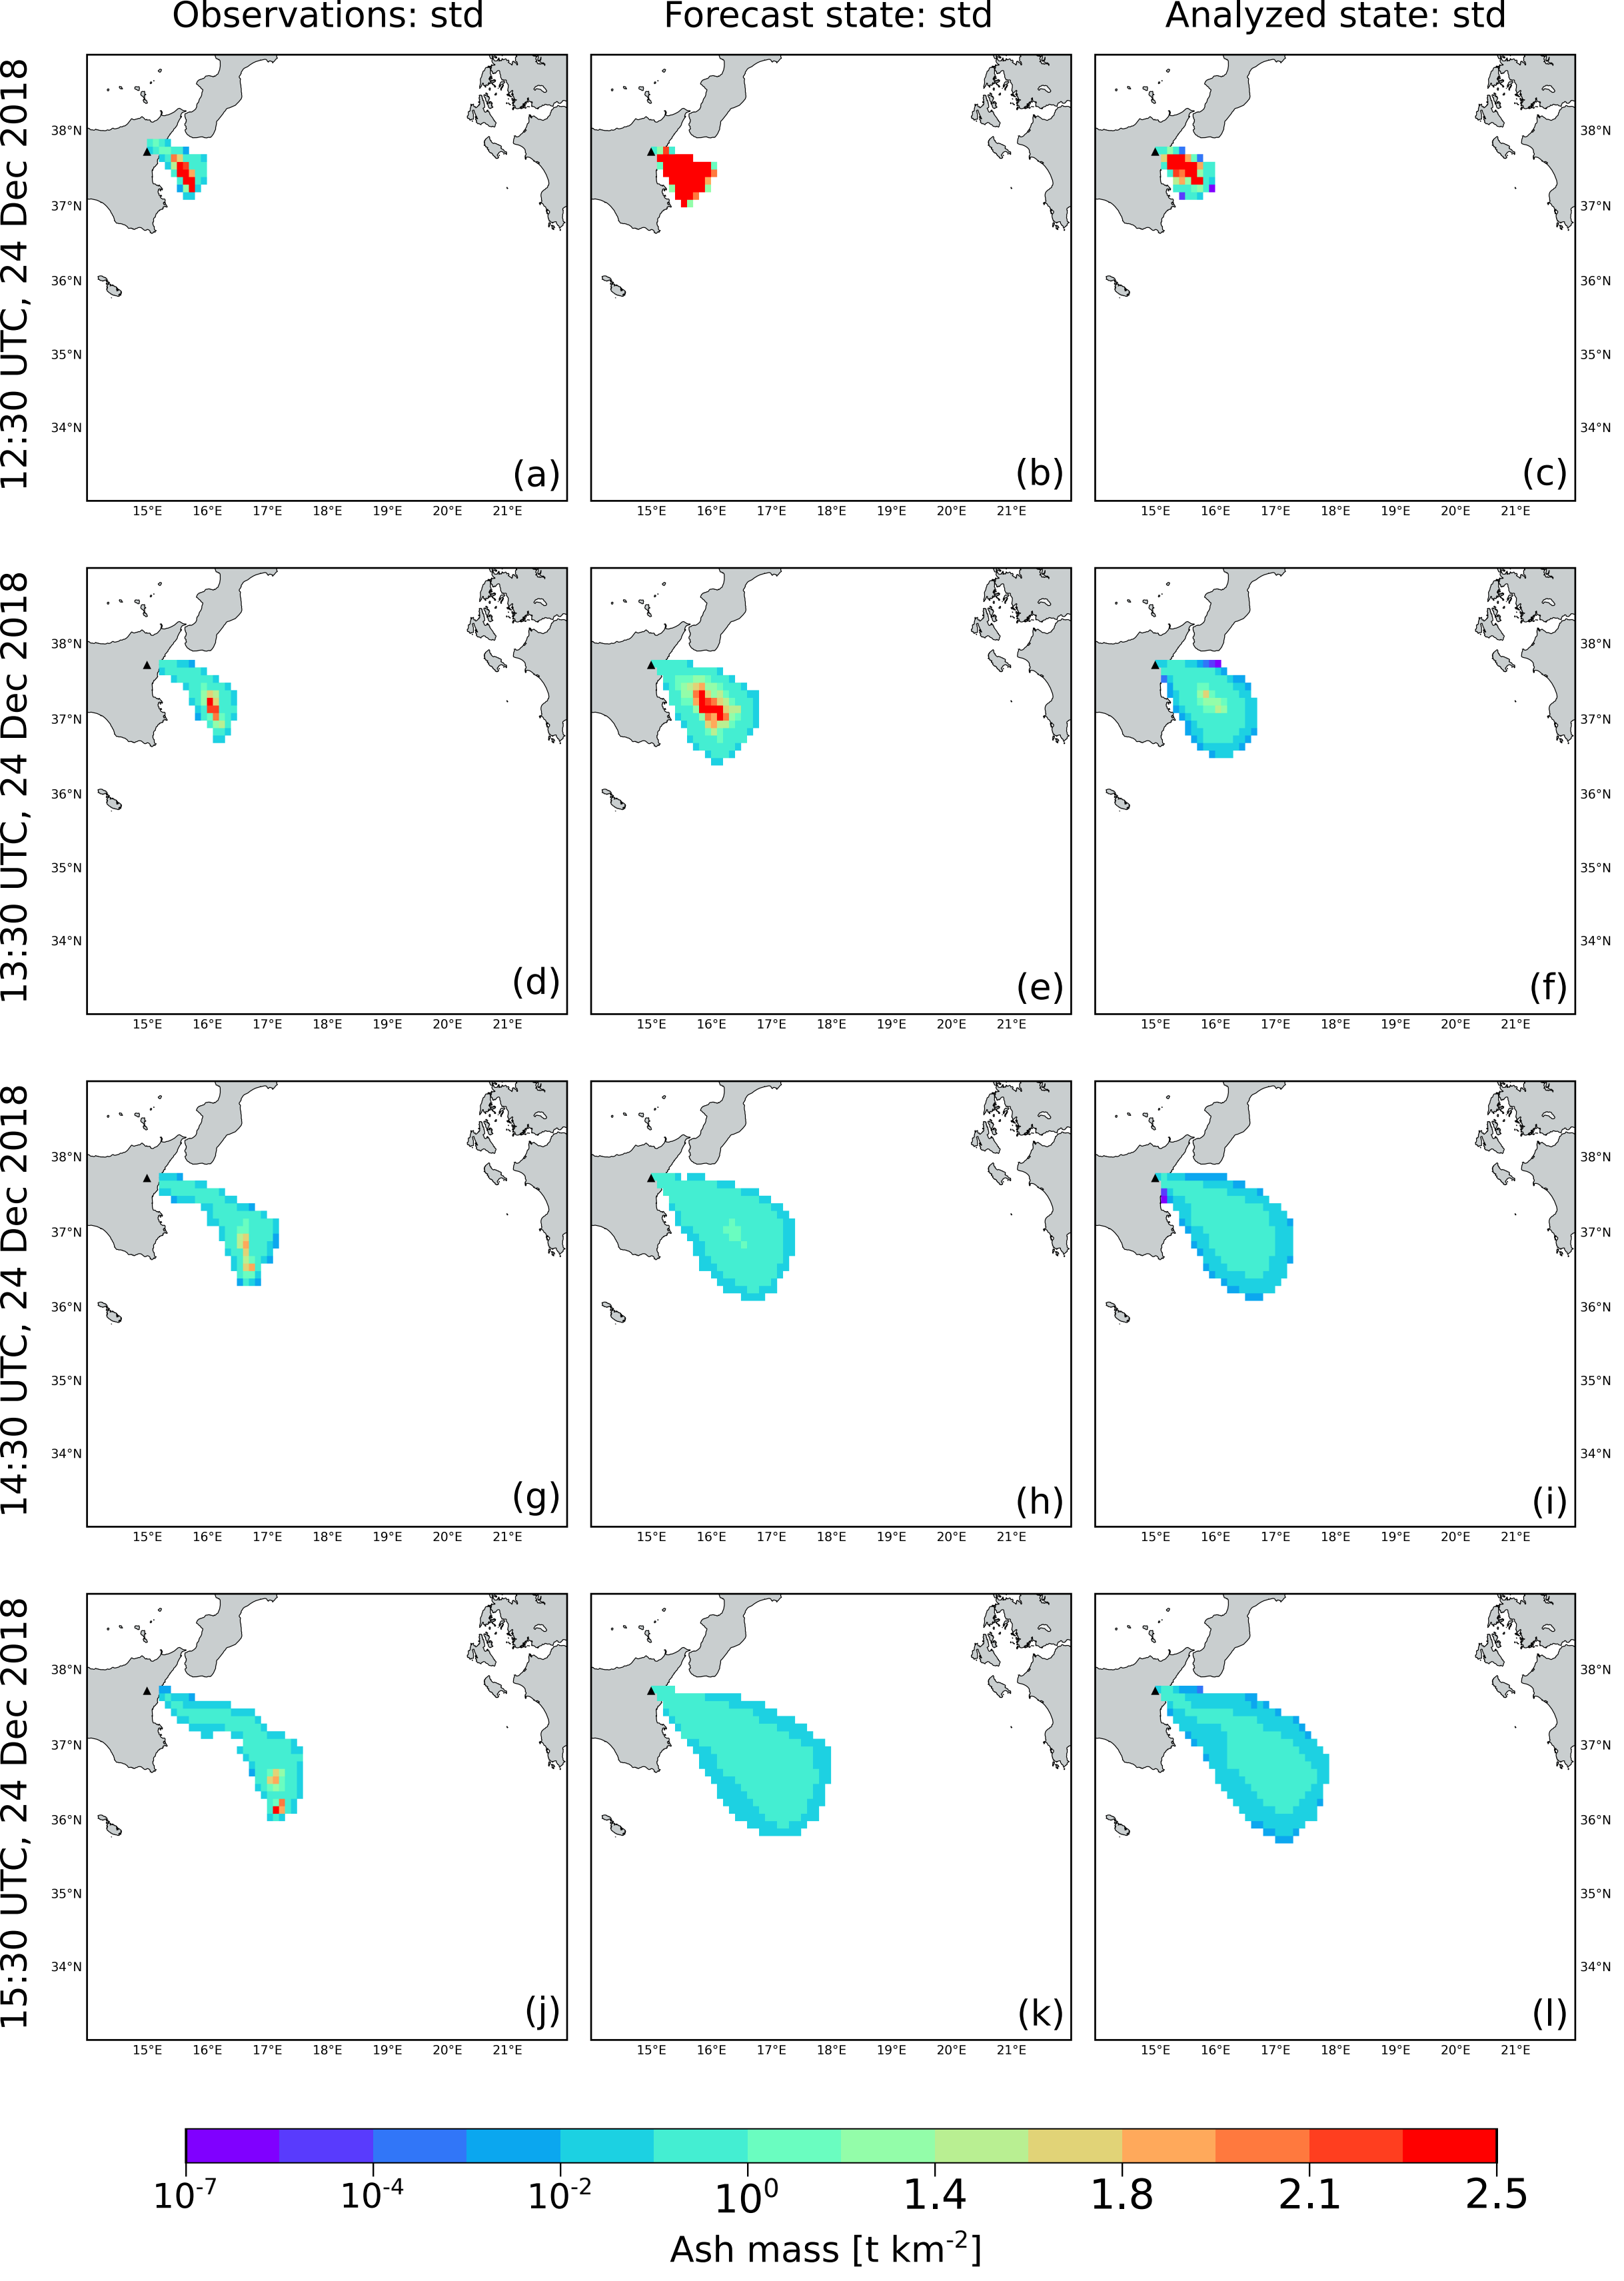

Supplement: s1 [file s1]

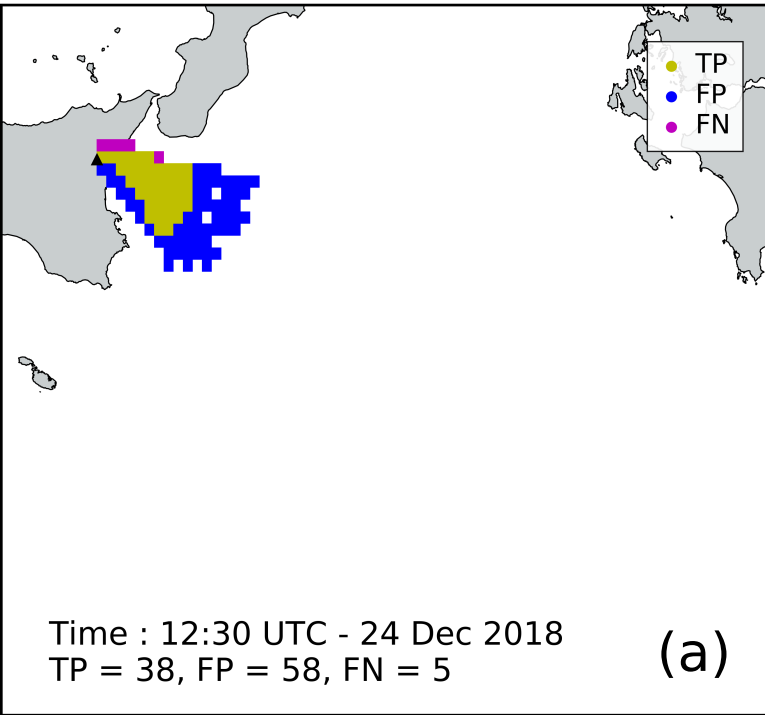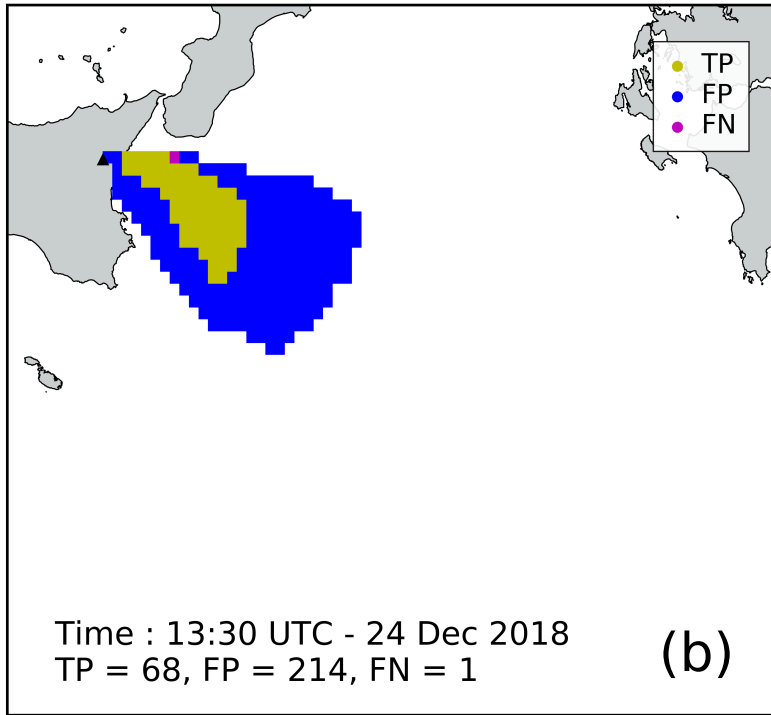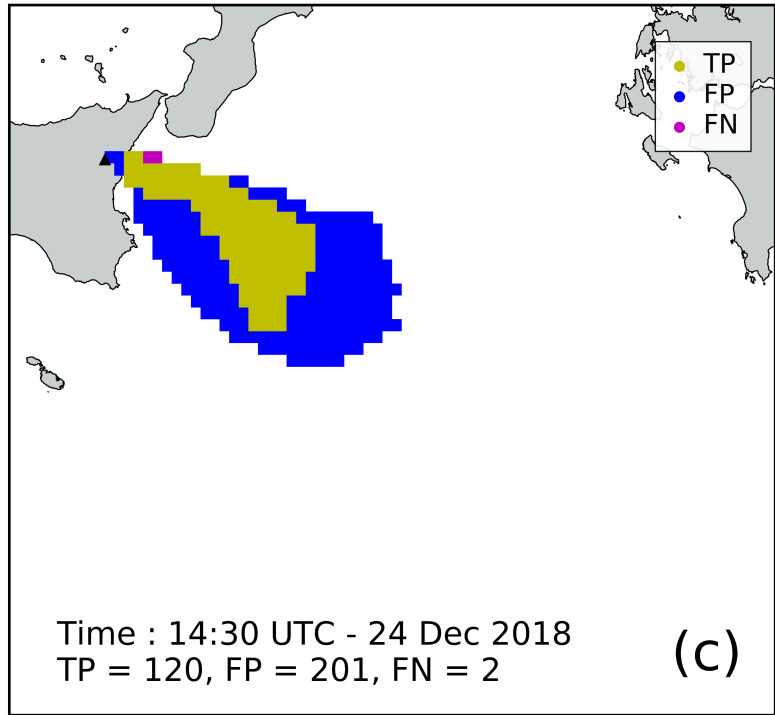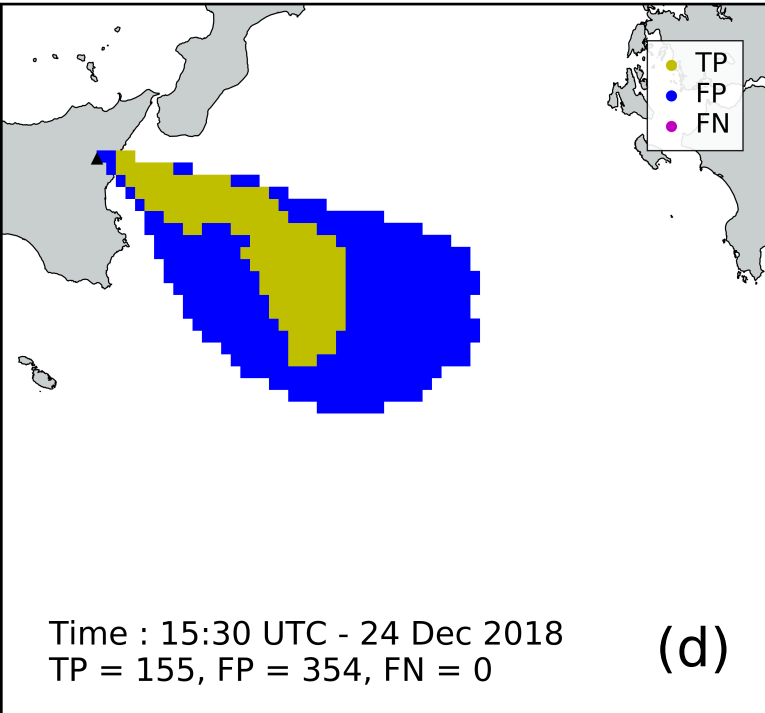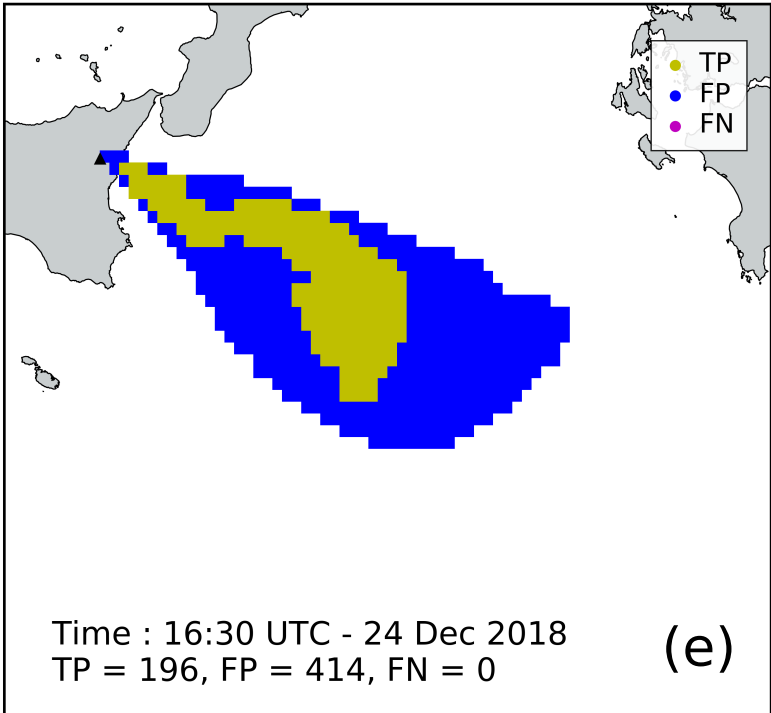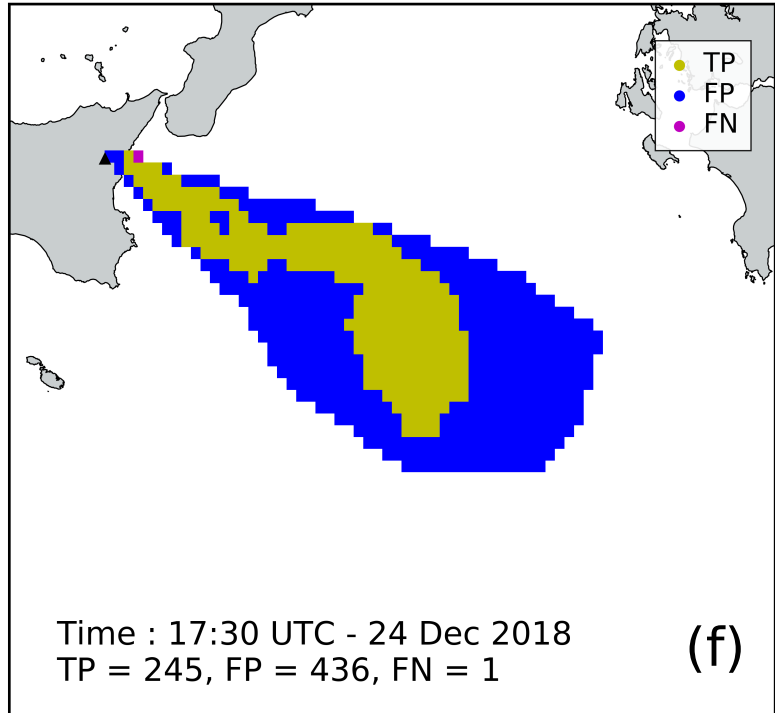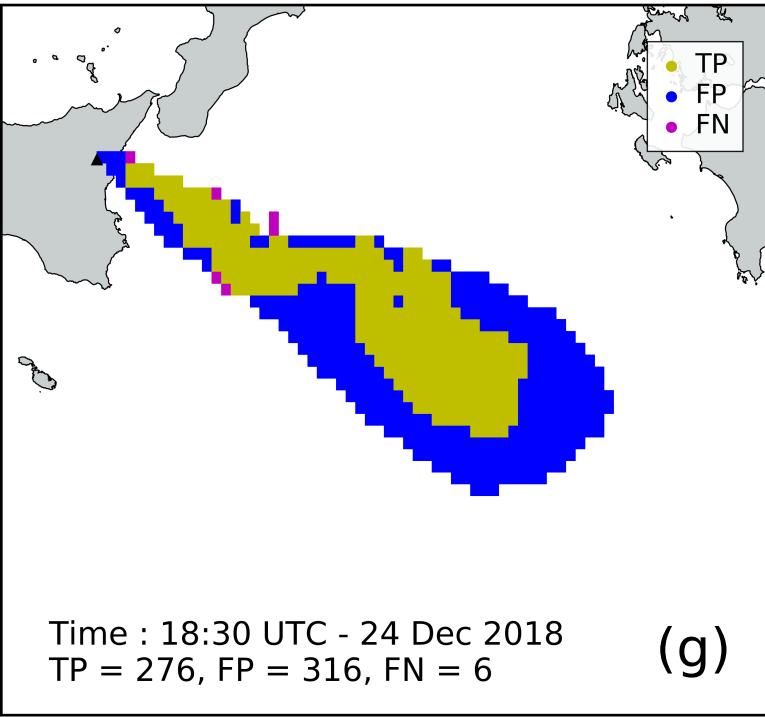

Supplement: s1 [file s1]

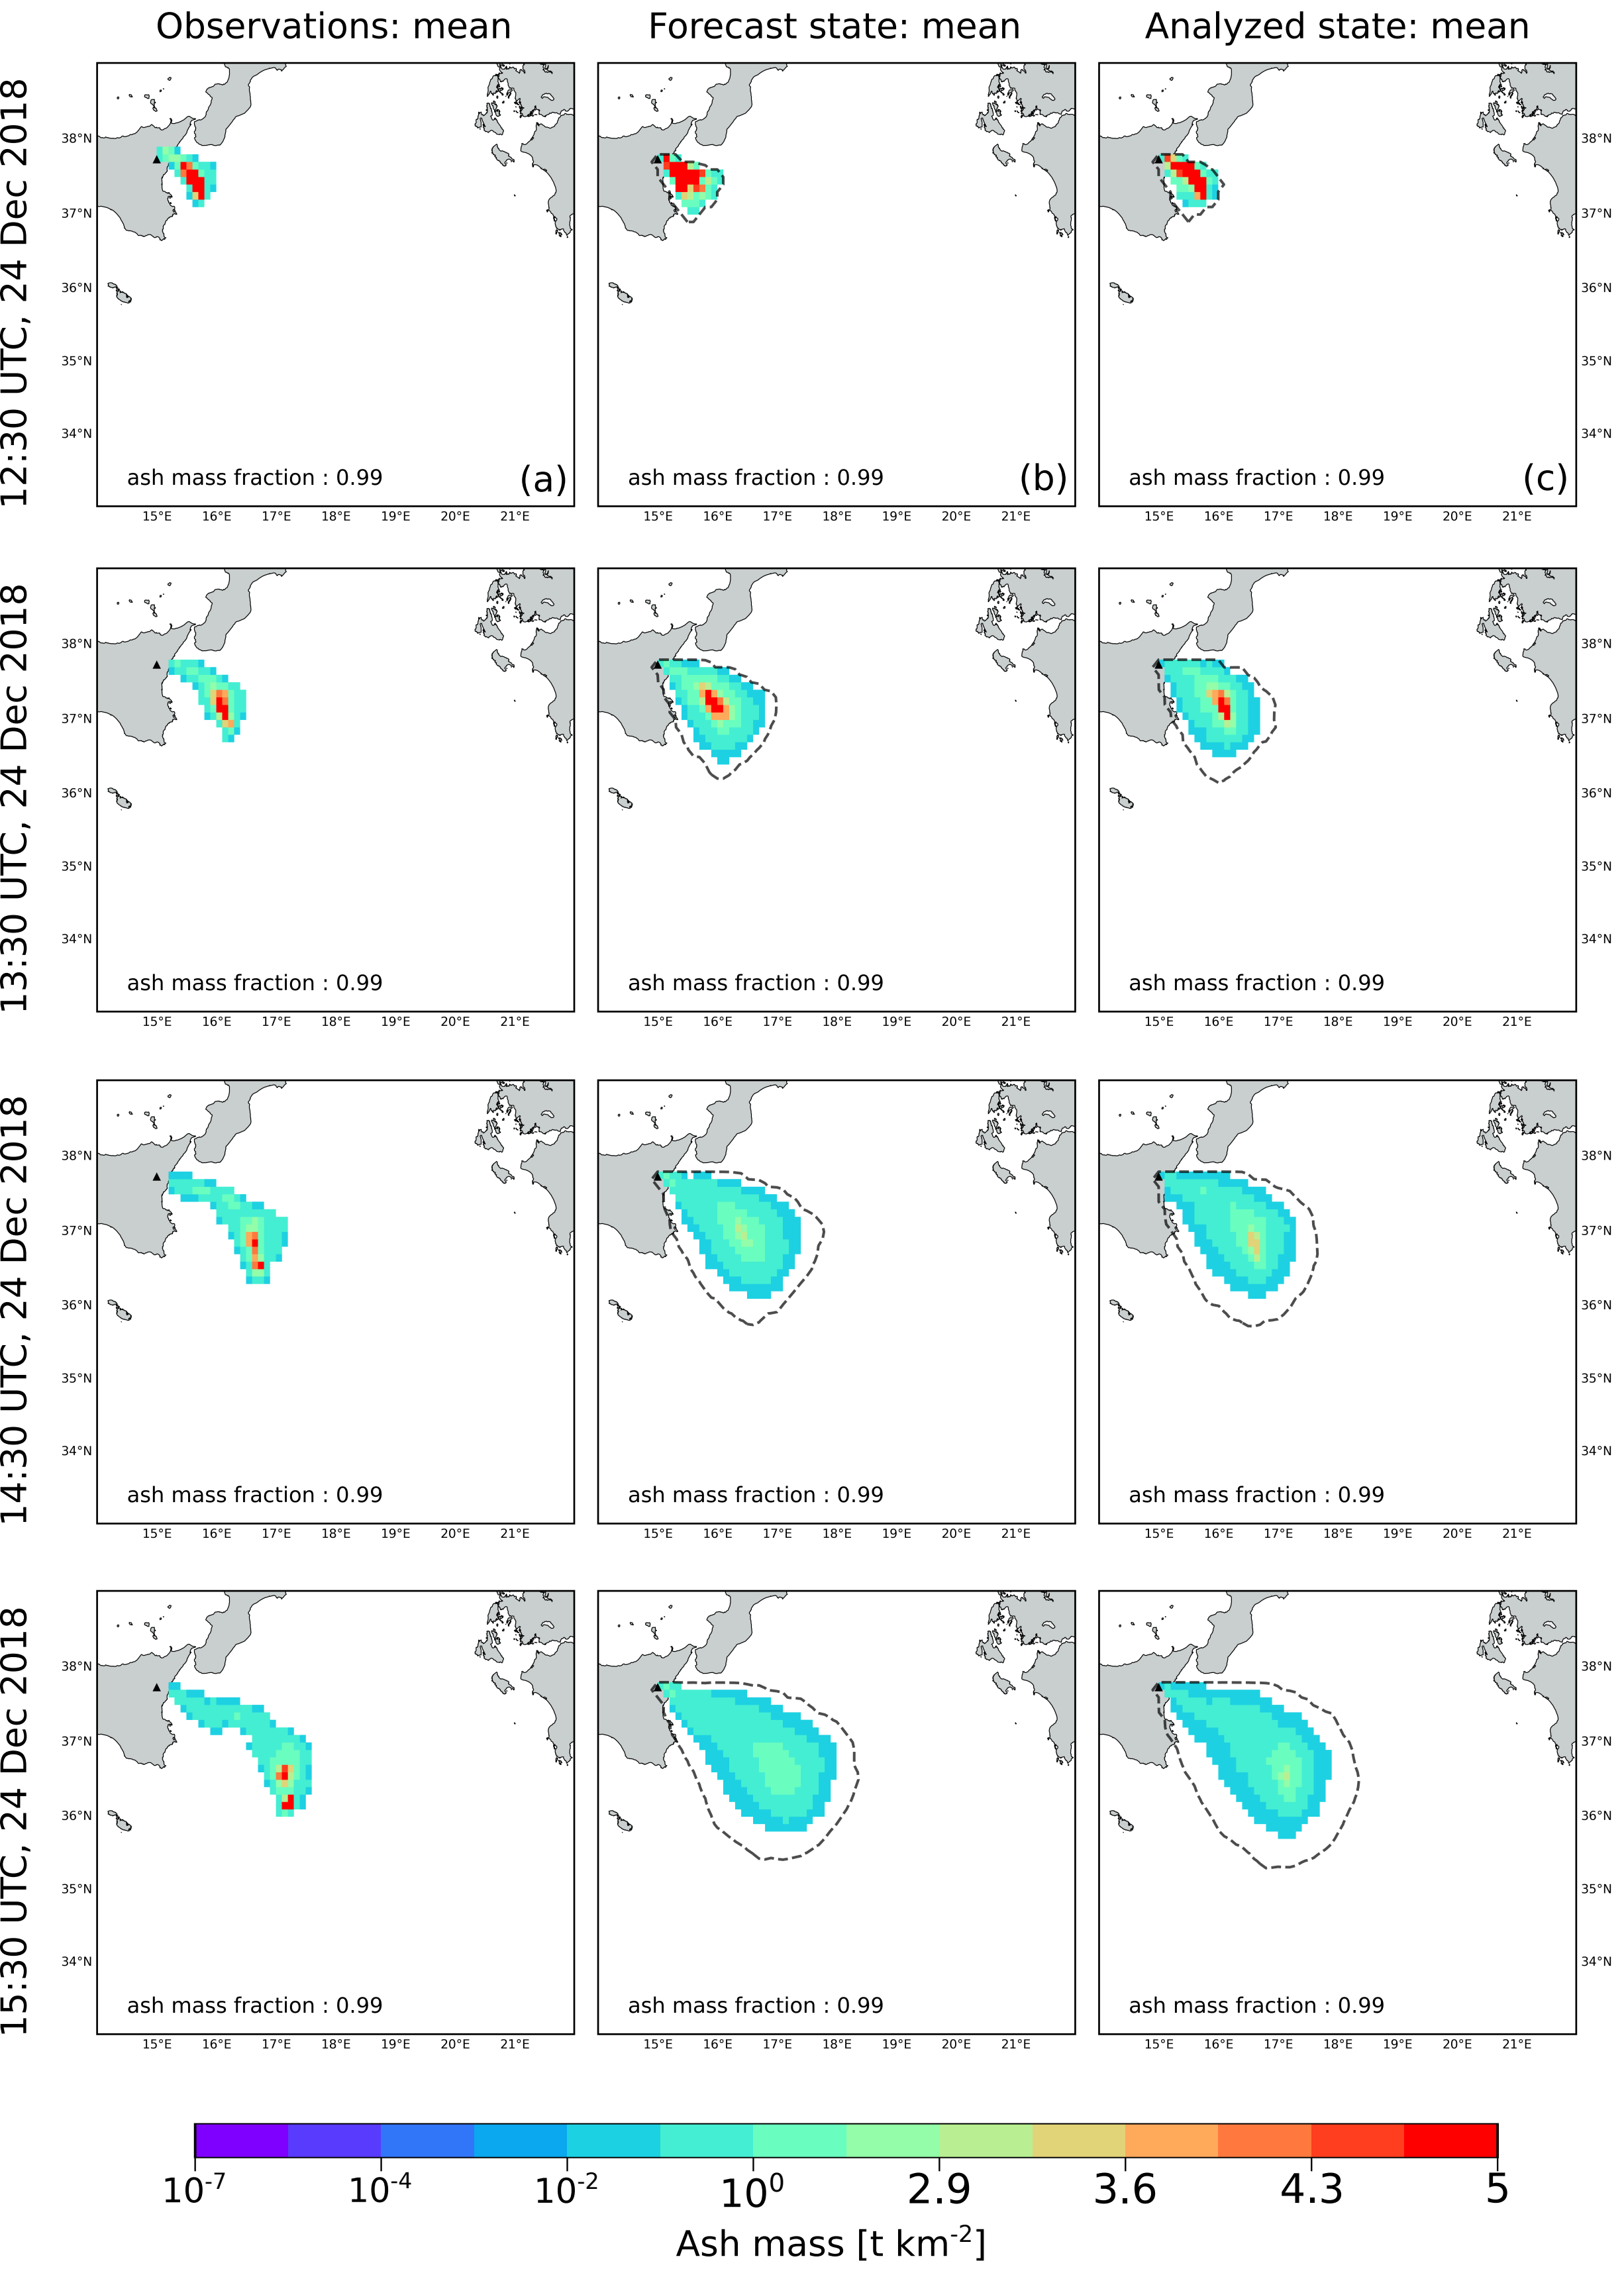

Supplement: s1 [file s1]

16:30 UTC, 24 Dec 2018

Observations: mean

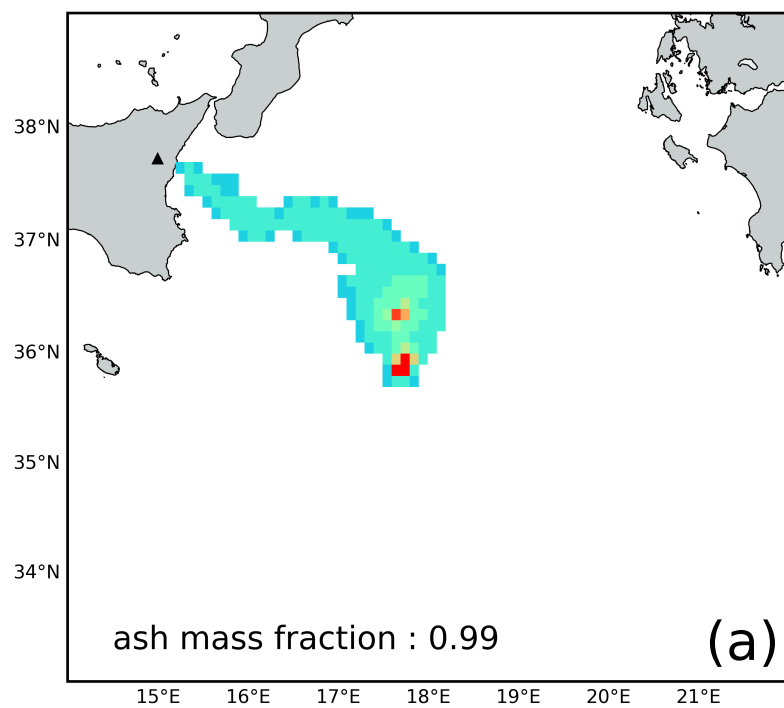

Forecast state: mean

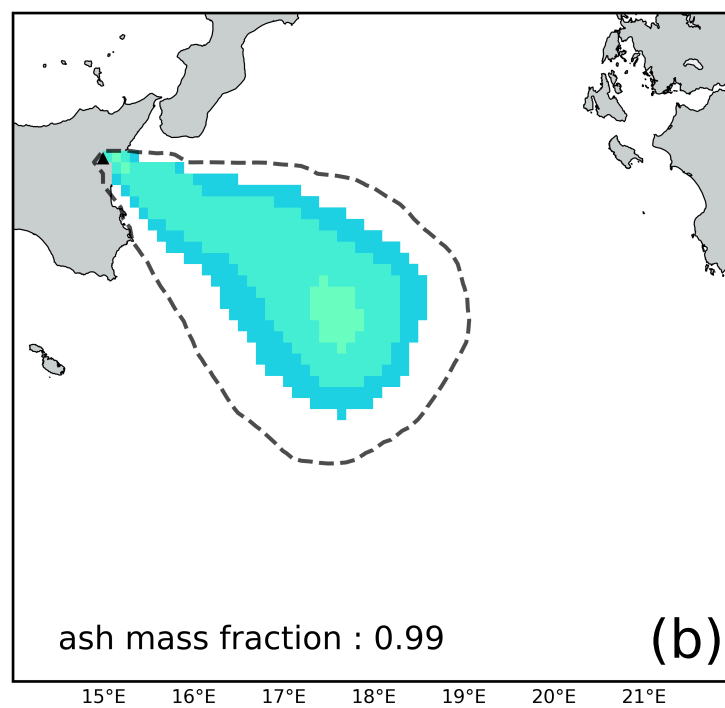

Analyzed state: mean

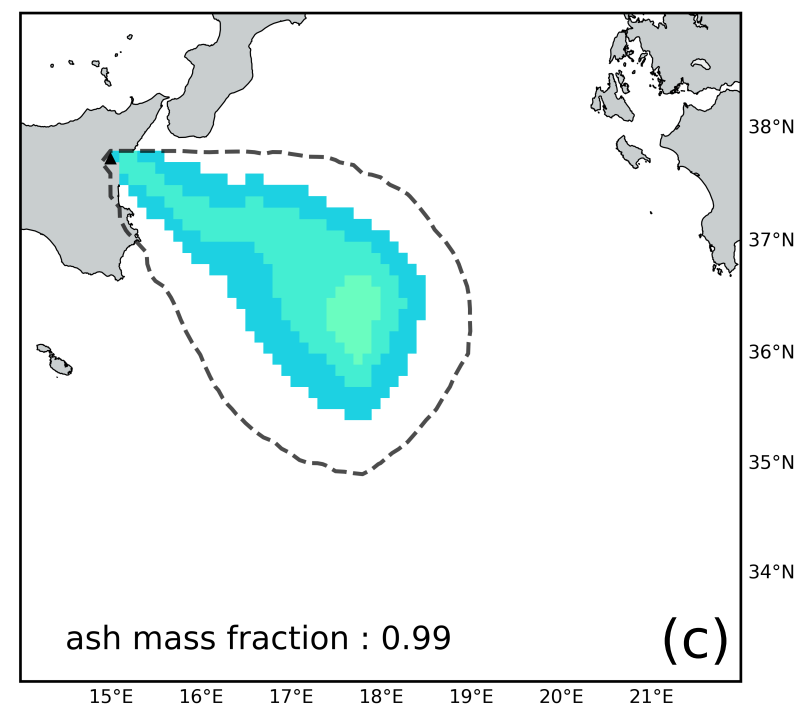

17:30 UTC, 24 Dec 2018

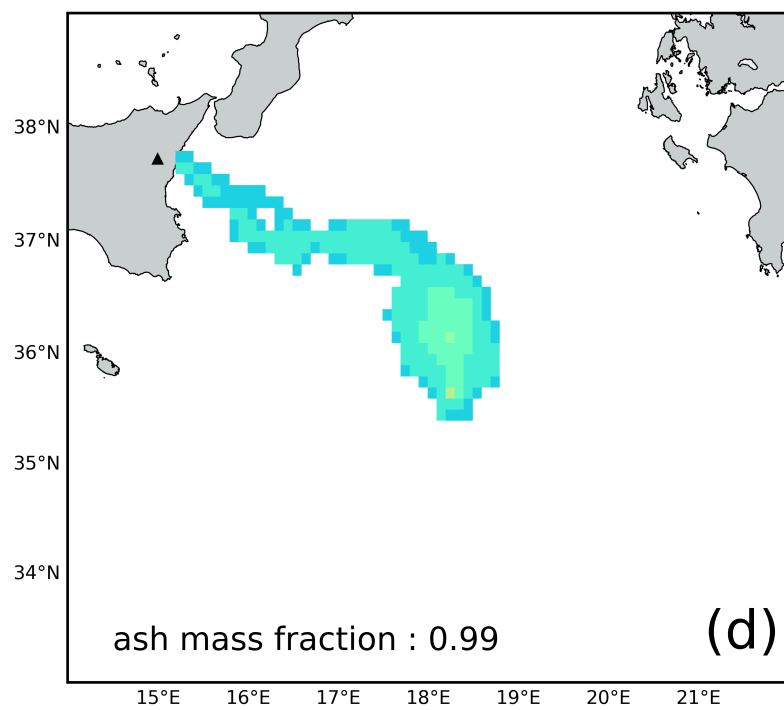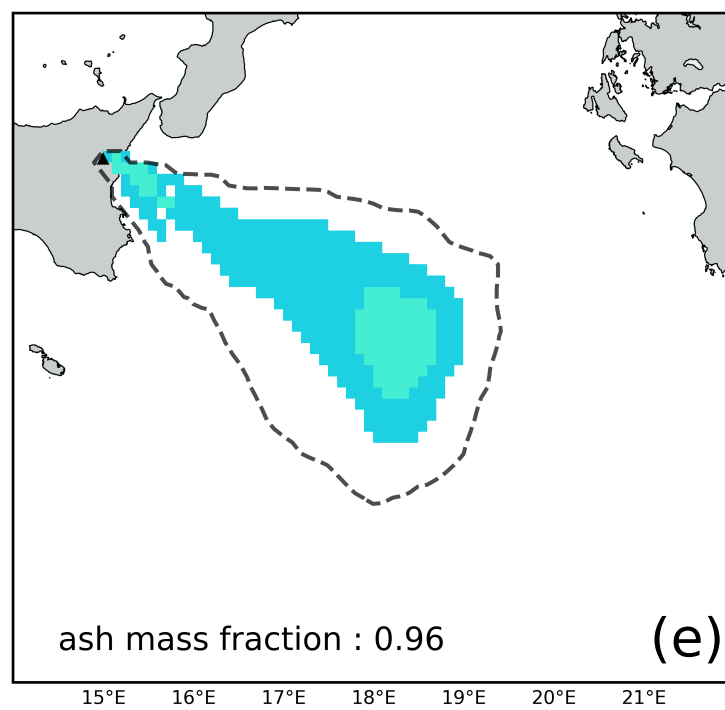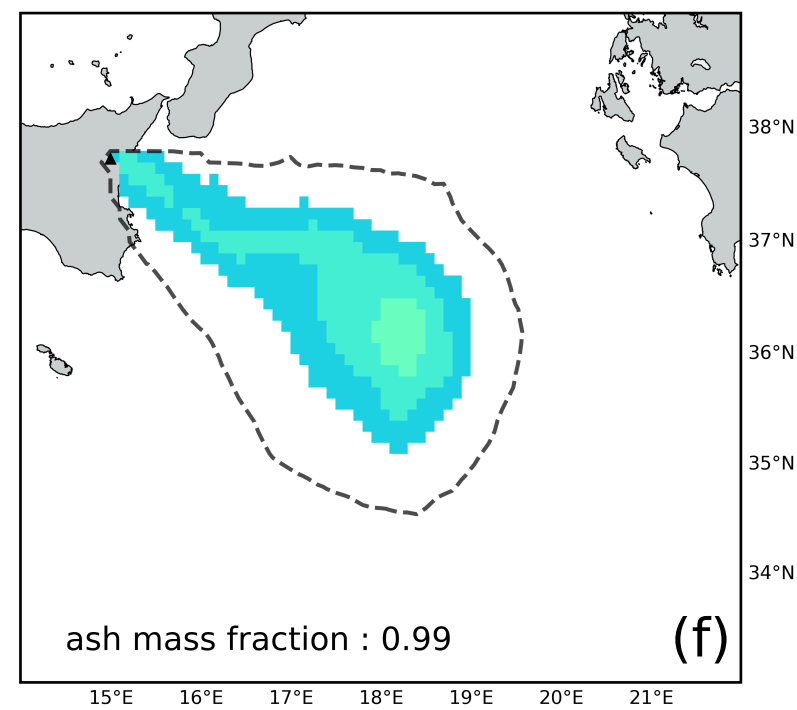

18:30 UTC, 24 Dec 2018

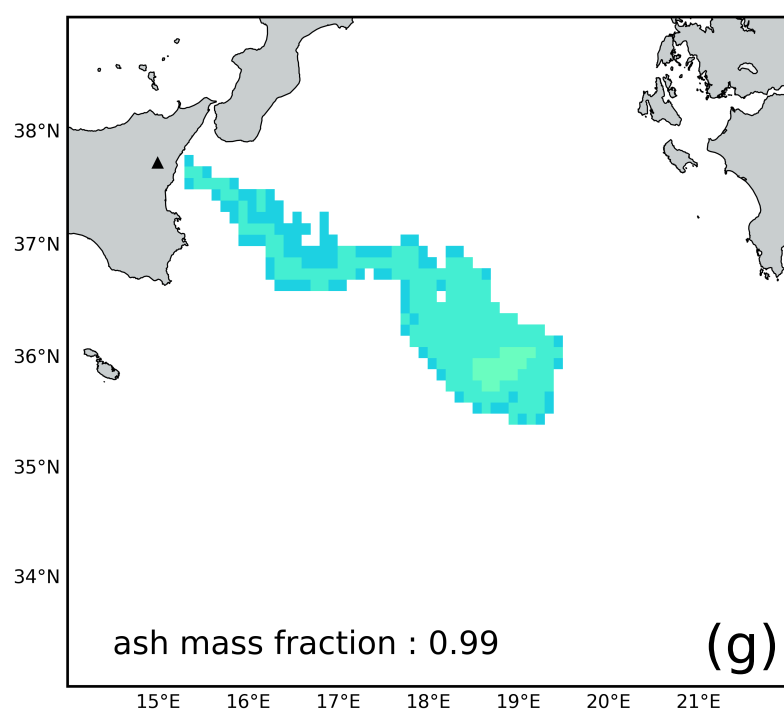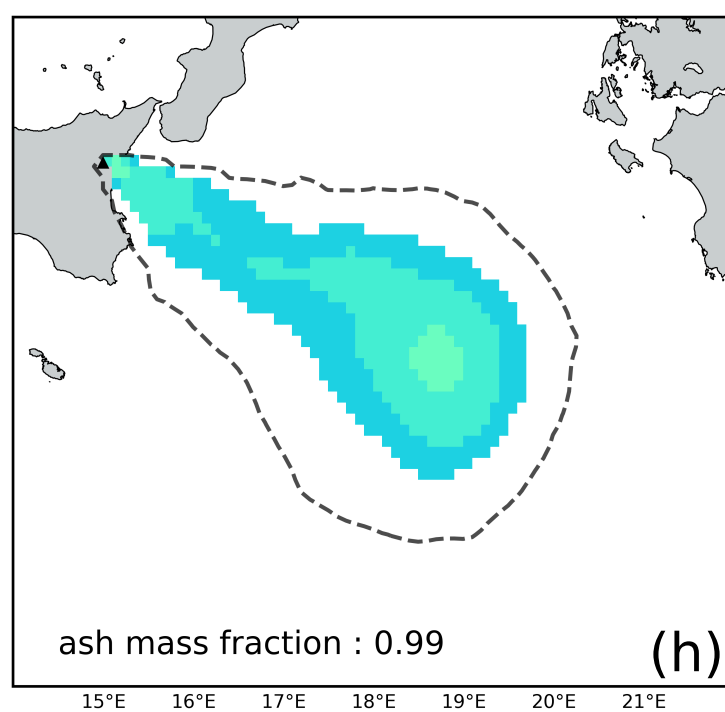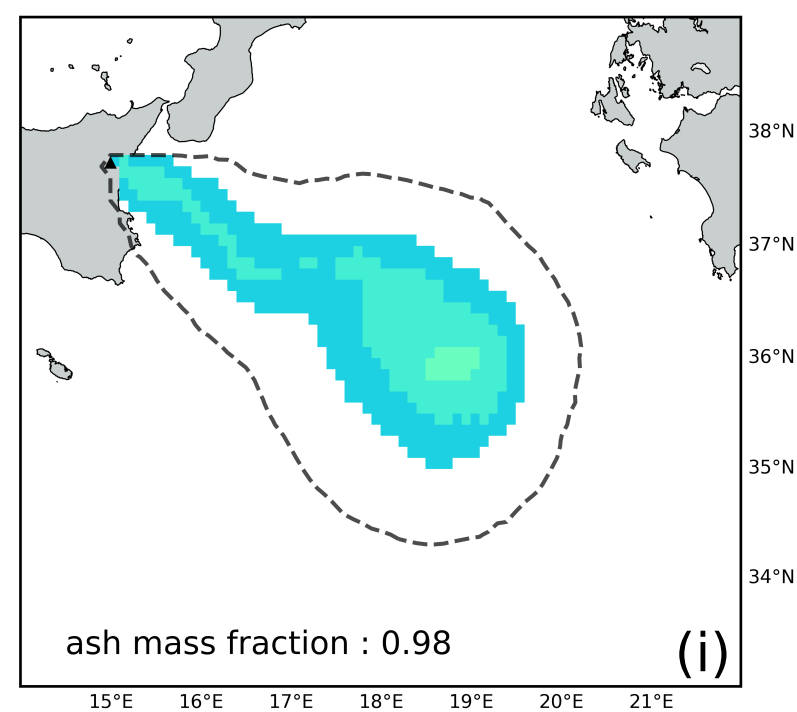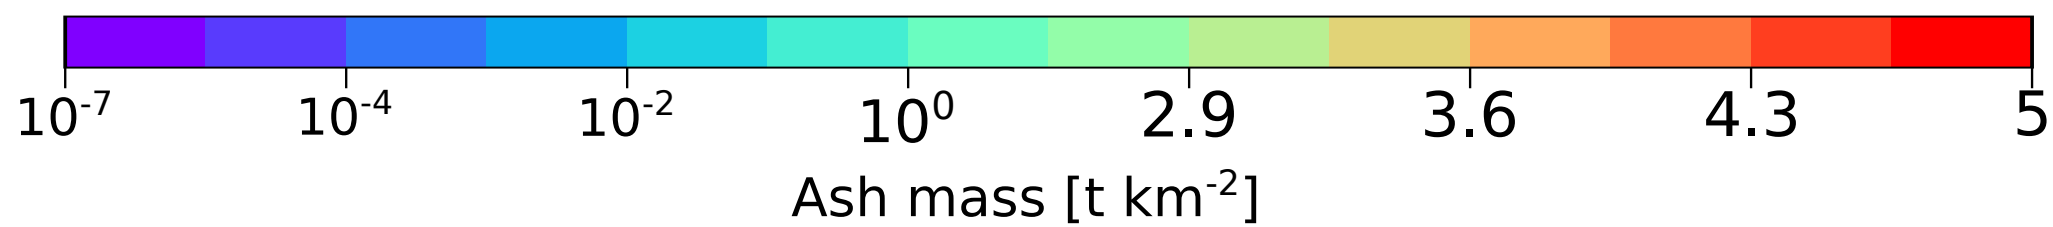

Supplement: s1 [file s1]

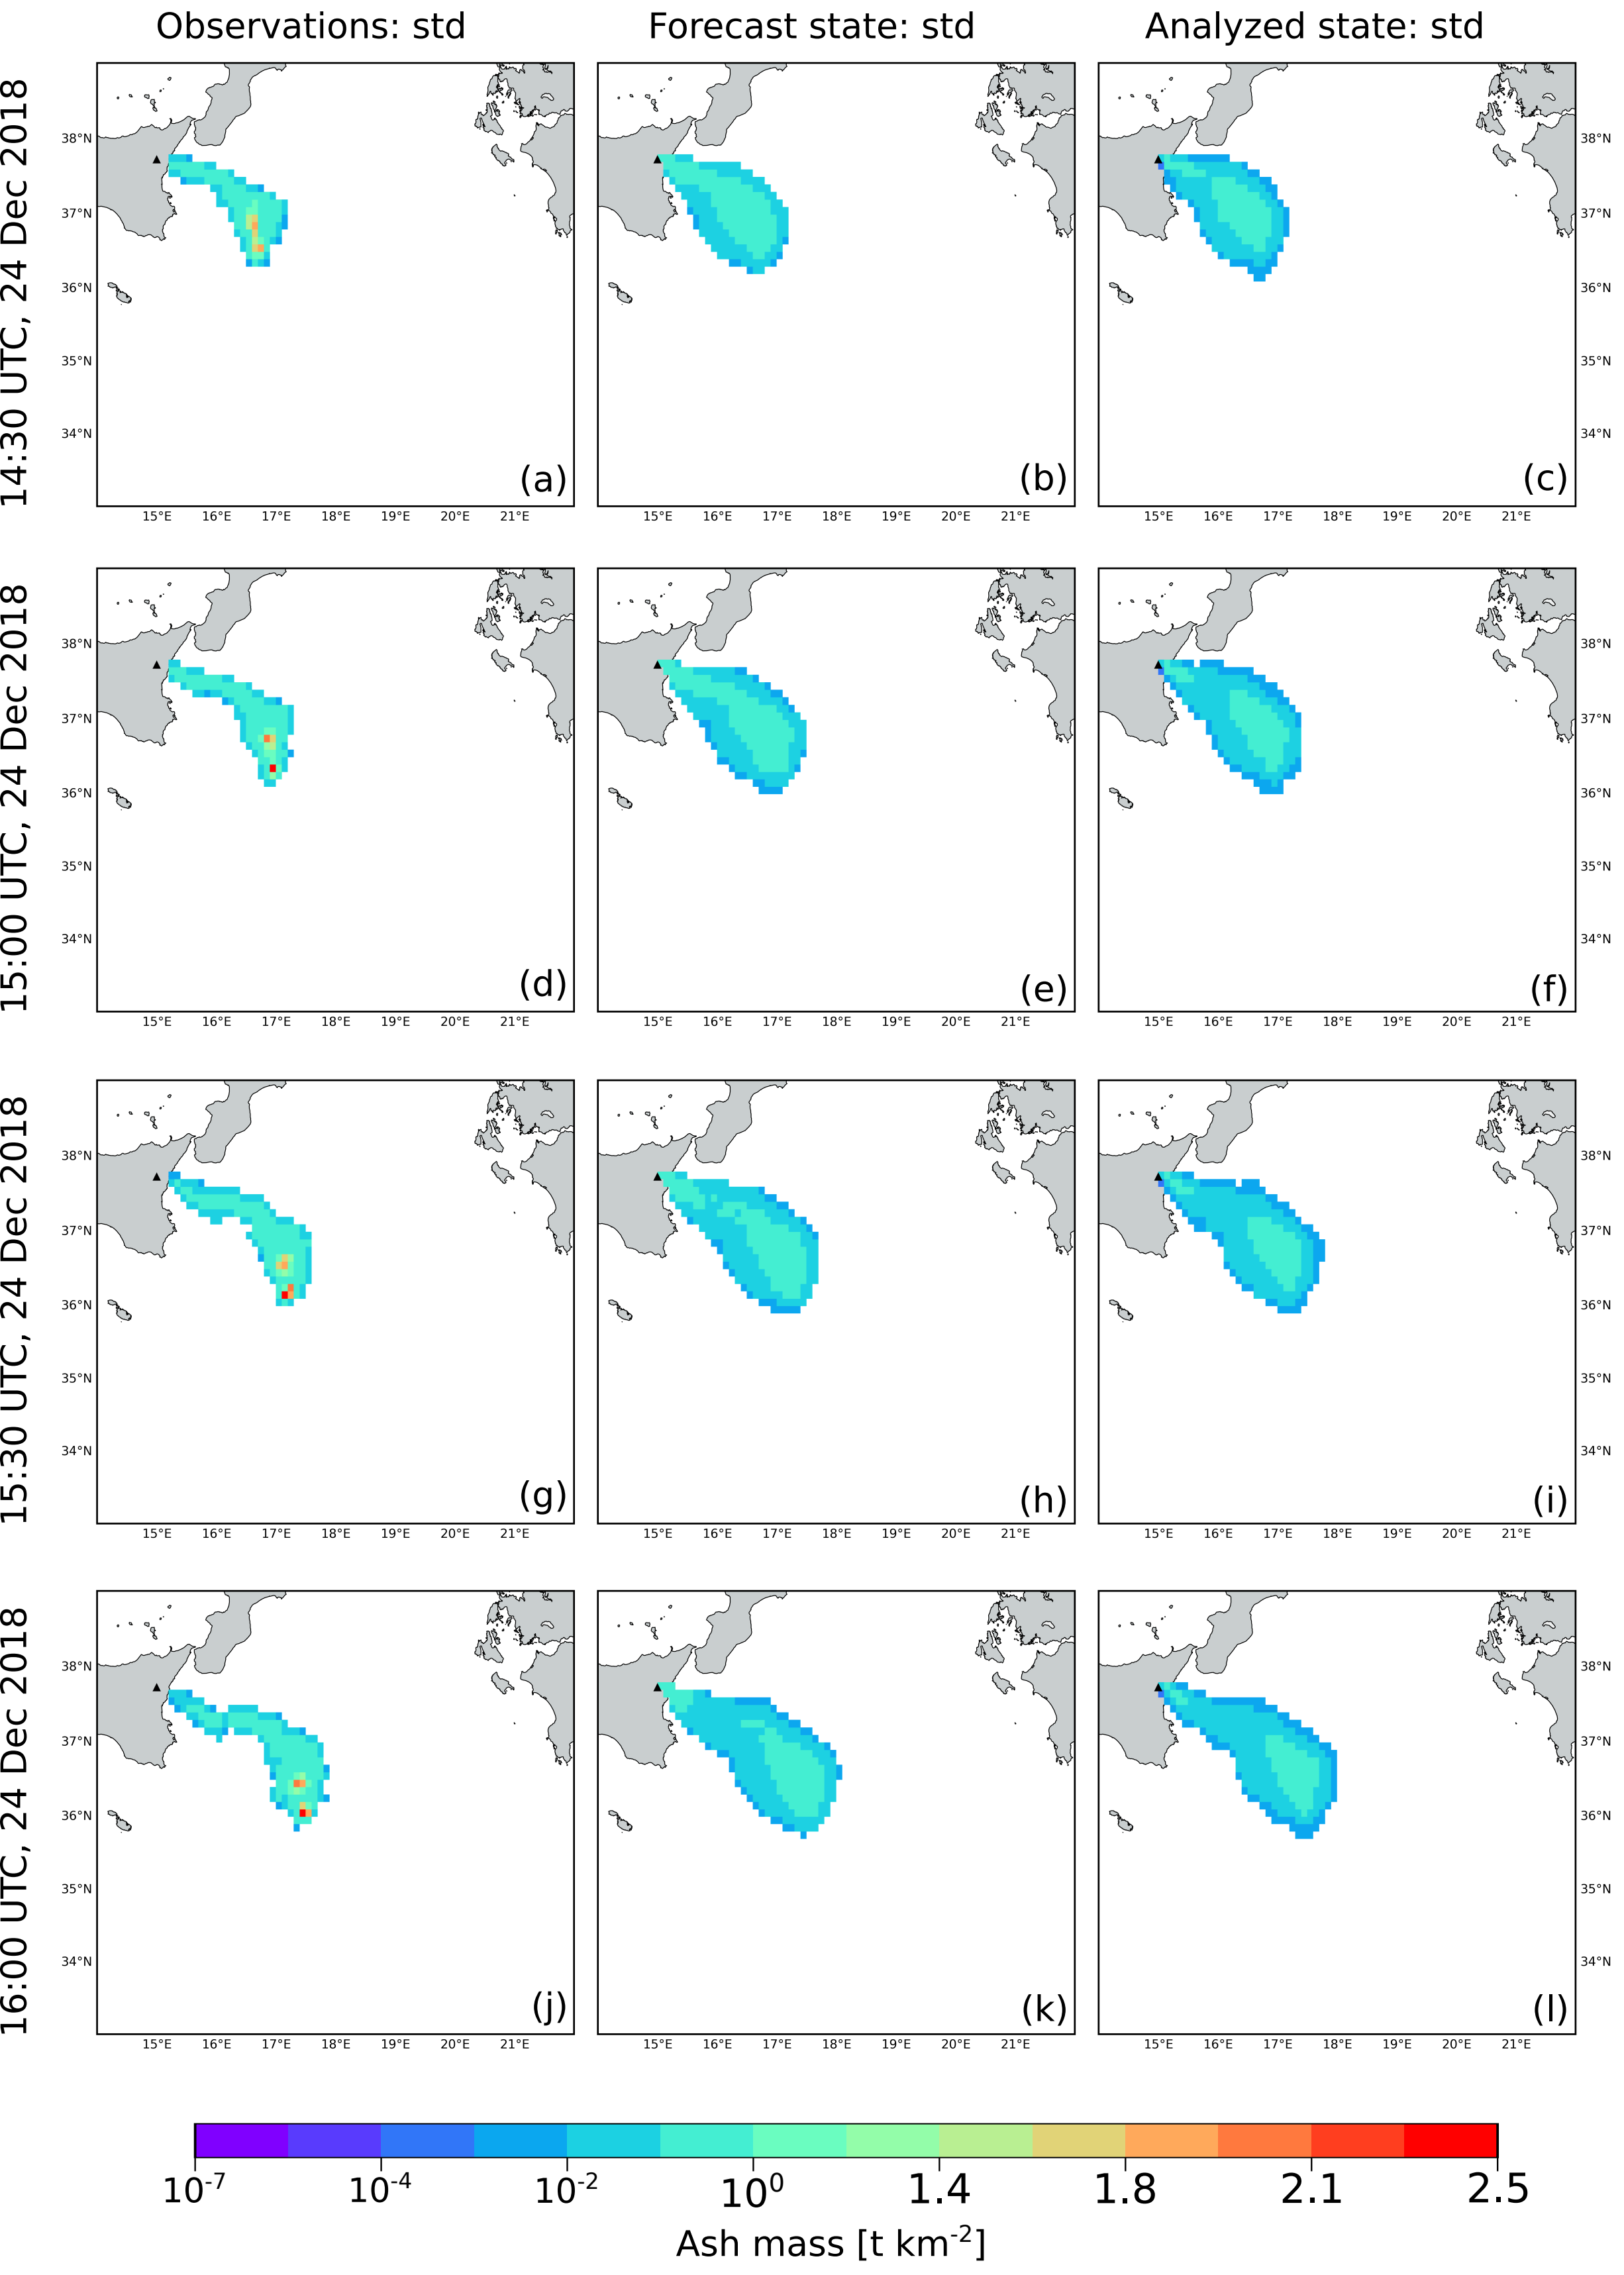

Supplement: s1 [file s1]
